# World Cynipoidea (Hymenoptera): A Key to Higher-Level Groups

Matthew L. Buffington,<sup>1,7,✉</sup> Mattias Forshage,<sup>2</sup> Johan Liljeblad,<sup>3,✉</sup> Chang-Ti Tang,<sup>4</sup> and Simon van Noort<sup>5,6,✉</sup>

<sup>1</sup>Systematic Entomology Laboratory, ARS-USDA c/o National Museum of Natural History, Smithsonian Institution, 10th & Constitution Ave NW, Washington, DC 20013, USA, <sup>2</sup>Department of Zoology, Naturhistoriska Riksmuseet, Box 50007, SE-104 05 Stockholm, Sweden, <sup>3</sup>Swedish Species Information Centre, PO Box 7007, SE-750 07 Uppsala, Sweden, <sup>4</sup>Department of Biological Sciences, The George Washington University, SEH, Suite 6300, 800 22nd Street, NW, Washington, DC 20052, USA, <sup>5</sup>Research and Exhibitions Department, South African Museum, Iziko Museums of South Africa, P.O. Box 61, Cape Town 8000, South Africa, <sup>6</sup>Department of Biological Sciences, University of Cape Town, Private Bag, Rondebosch 7701, South Africa, and <sup>7</sup>Corresponding author, e-mail: [matt.buffington@usda.gov](mailto:matt.buffington@usda.gov)

Subject Editor: Heather Hines

Received 1 October, 2019; Editorial decision 14 February, 2020

## Abstract

While much has been learned regarding the phylogeny and evolution of cynipoid wasps, clearly illustrated diagnostic tools and identification keys have remained stagnant. So too, where keys do exist, they are often to genus or species, and there are no user-friendly keys to groups such as tribes, subfamilies, or families. This state of affairs leaves a knowledge gap for non-specialists and slows future research on the group. To address this, we provide a fully illustrated key to the higher-level groups of world Cynipoidea. We also provide summaries of all higher-level taxa with updated generic lists, biological data, distribution, and literature resources. The dichotomous key presented here is complimented with a multi-entry matrix-based key, created in Lucid, and served on [www.waspweb.org](http://www.waspweb.org) with online versions of the dichotomous keys also available.

**Key words:** gall wasp, Cynipidae, Figitidae, parasitoid, Ibalidae

Cynipoid wasps are a relatively diverse lineage of Hymenoptera. Species range from being internal parasitoids of endopterygote insect larvae, including hyperparasitoids, to gall inducers on higher plants. To address the diversity of this group from an identification standpoint, [Weld \(1952\)](#), and later, [Fergusson in Goulet and Huber \(1993\)](#) have been the best resources for identifying families within the group. Since these publications came out, the general understanding of the evolution of cynipoids, and their classification, has changed significantly. Further, our taxonomic knowledge of many groups within the cynipoids has matured, while a taxonomic resource to higher groups (families, subfamilies, and tribes) has languished. We present here a fully illustrated identification key to the higher-level groups of Cynipoidea of the world. In addition, we provide a general overview of each group, taxonomic resources that are available for that group, comments on the biology and evolution of the group, and an updated list of genera currently assigned to that group.

The key allows identification to families, and further for the two common and species-rich families: Cynipidae into its constituent tribes, and Figitidae into its subfamilies. Thus, family-level taxa which the key does not allow identification of are the subfamilies of the rare Liopteridae, and the still somewhat preliminary tribes of the figitid subfamily Eucoilinae.

## Key to Families, Subfamilies, and Tribes of World Cynipoidea

The skeleton of this key was devised by MB, MF, and JL while teaching The Hym Course in Tovetorp, Sweden, in 2012; later drafts were updated with student feedback from each subsequent Hym Course offering. Some key characters are modifications of the Hymenoptera of the World key ([Goulet and Huber 1993](#)). Additional characters and character state definitions presented here follow [Ronquist et al. \(2015\)](#) and [van Noort et al. \(2015\)](#). All morphological terms follow those used in Hymenoptera of the World ([Goulet and Huber 1993](#)) and are further defined on the Hymenoptera Anatomy Ontology project (<http://portal.hymao.org/projects/32/public/ontology/>). No new terminology is introduced here. Reviewers of earlier drafts of this paper helped in clarifying problematic characters and definitions. The key is illustrated using color photomicrographs of museum specimens. We are hoping this brings the user closer to the reality of working with specimens. For those interested in using a multi-entry matrix key, [www.waspweb.org](http://www.waspweb.org) hosts the Lucid version of this key.

The key covers all Cynipoidea worldwide, and some of these groups are only found in certain areas or on certain plants. Some rarer taxa that may not be routinely collected worldwide

include Austrocynipidae, Liopteridae, and among the cynipids, the tribes Qwaqwaiini, Phanacidini, Pediapidini, Paraulacini, and Eschatocerini; among the figitids, Parnipinae, Thrasorinae, Pycnostigminae, Emargininae, Euceroptinae, Plectocynipinae, and Mikeiinae. If the user arrives at any of these using the key, we suggest double-checking the characters before making a final decision.

The systematic overview following the key gives a general introduction to each group, especially in terms of diversity, geographical distribution, and biology. Diagnostic characters are usually not repeated in this section, but certain morphological key factors in evolution are highlighted. We list the most relevant literature, and the included genera in each group. The genera are ordered into any valid family-level taxa, the authorship of which are given (and in a few cases in informal groups of genera). For genera, authorship, species number, and geographical distributions are given. Geographical distributions are summarized in text or by abbreviations of biogeographic regions; AT for Afrotropical, AU for Australasian or Oceanic, NA for Nearctic, NT for Neotropical, OR for Oriental, PA for Palearctic (often divided into wPA and ePA for western and eastern Palearctic).

There is no single up to date, authoritative catalog for Cynipoidea. The closest to an updated online resource is Hymenoptera Online (<https://hol.osu.edu/>), which contains JL's personal cynipid catalog started in the late 1990s, as well as various other cynipoid taxa added over time. It contains a large number of problematic names, and changes made and taxa described since 2008 have been somewhat haphazardly maintained in HOL, as there is no one cynipoid curator of the data in that database. MF has kept a personal catalog focused mostly on Figitidae. Parts of this catalog have been published over time in smaller regional projects (e.g., [Forsbage et al. 2013](#); [van Noort et al. 2015](#)). Charipinae have been cataloged by the Barcelona research group ([Ferrer-Suay et al. 2012](#)); however, these data are not yet present in HOL. Thus, here we have based classification and species numbers on our own lists, manually keeping track of the additions and subtractions from the last decades, referring back to HOL for comparison but including numerous changes from recent years alerted via Zoological Record and other sources, as well as making certain pragmatic considerations.

There are still a rather large number of mystery names available, linked to lost or missing type specimens. In some cases, it is not clear if a particular name even belongs in Cynipoidea, or rather Chalcidoidea, Diapriidae or dipteran Cecidomyiidae. Further, some genera (e.g., *Eucoila*, *Ganaspis*, *Trybliographa*, *Andricus*, *Dryocosmus*) have had a large number of species assigned to them for seemingly arbitrary reasons. Keeping all these difficult circumstances in mind, we have presented species numbers that we have found documentation for and consider meaningful as preliminaries, while these numbers may still differ significantly from actual species numbers. In genera where these numbers are particularly problematic, we have mentioned this specifically, and also to indicate where particularly large number of undescribed species belong, as well as where large numbers of clearly misclassified or insufficiently known species reside. Hopefully, the data here will pinpoint where future research is most needed.

All specimens used here, except for Qwaqwaiini, are housed at the USNM (National Museum of Natural History, Washington, DC) and were often cleaned with a minute paintbrush and mounted to achieve the necessary views for each couplet. Unique specimen identifiers, in the form of USNMENT 'barcode' numbers, link images to specimens housed at the USNM. Images were captured using a Macroscopic Solutions 'microkit' (Tolland, CT) imaging station and stacked using Zerene Stacker LLC (Richland, WA). Please contact MB for additional details of this process.

We suggest the following to get the most out of using this key: 1) high-quality optics are a necessity for observing the pronotal plate and other small features throughout the key; 2) light dispersing film (in the United States, mylar is commonly used) should be installed if using fiber optic light sources with incandescent bulbs (the glare produced by these lights will obscure details of the cuticle). Lastly, having some biological and geographic data will make using the key easier.

As the basic identification of many of these groups is a general impediment to taxonomic progress, this key, and the taxonomic treatments that follow, provide a point of entry into cynipoid research not previously available. We hope this publication spurs renewed interest in cynipoid systematics, biology, and evolution.

## Identification Key to Families, Subfamilies, and Tribes of World Cynipoidea

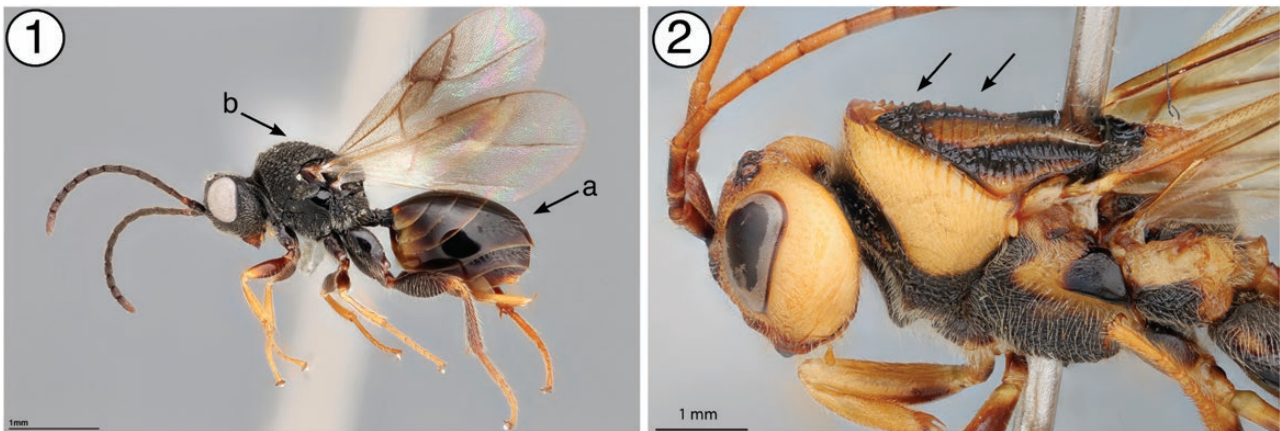

**Figs. 1 and 2.** Fig. 1, *Paramblynotus virginianus* Liu, Ronquist and Nordlander, 2007, lateral view. USNMENT01231827. Fig. 2, *Ibalia anceps* Say, 1824, lateral view. USNMENT01231826.

1. Metasomal segment four, five or six the largest (in lateral view), with two to four small segments preceding largest segment (a, Fig. 1). Wings always fully formed, with marginal cell of forewing sometimes very elongate. Often large wasps, exceeding 10 mm in length. Mesoscutum with heavy sculpture (well-developed ridges or pits; b, Fig. 1; arrows, Fig. 2) .....

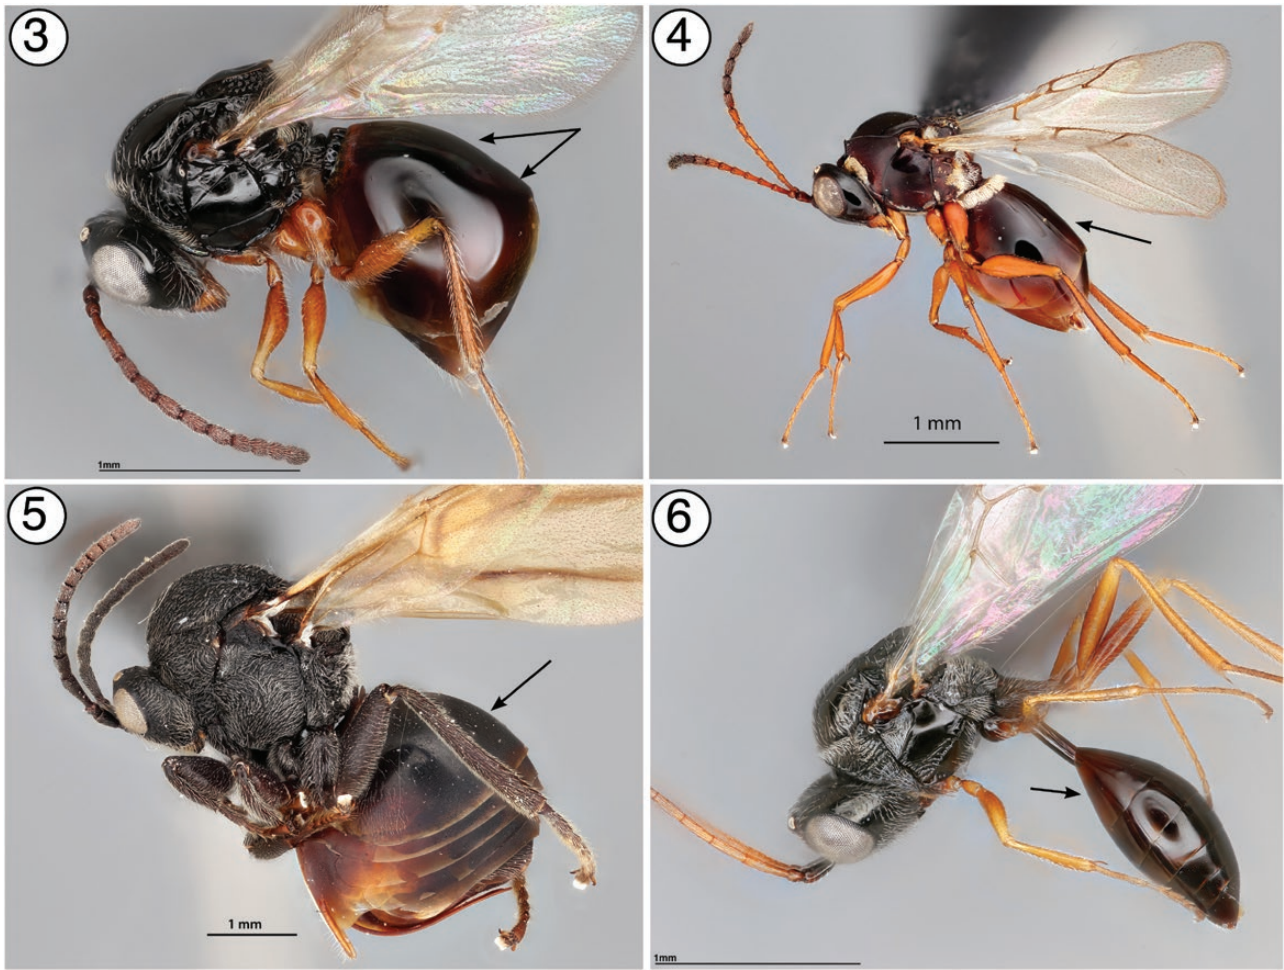

**Figs. 3–6.** Fig. 3, *Afrostitlba* sp., lateral view. USNMENT01022103. Fig. 4, *Dieucoila* sp., lateral view. USNMENT01231825. Fig. 5, *Amphibolips hidalgoensis* Pujade-Villar and Melika, 2011, lateral view. USNMENT01231834. Fig. 6, *Anacharis melanoneura* Ashmead, 1887, lateral view. USNMENT01231833.

— Metasomal segment two or three the largest (in lateral view), or fused into a syntergum (arrows, **Figs. 3 and 4**), with at most one or two segments preceding the largest (arrows, **Figs. 5 and 6**). Wings usually fully formed; marginal cell of forewing usually shorter, rarely as long as 3× as long as high. Adult wasps smaller than 10 mm in length. Deep ridges in mesoscutum less common; typically microcoriaceous or smooth

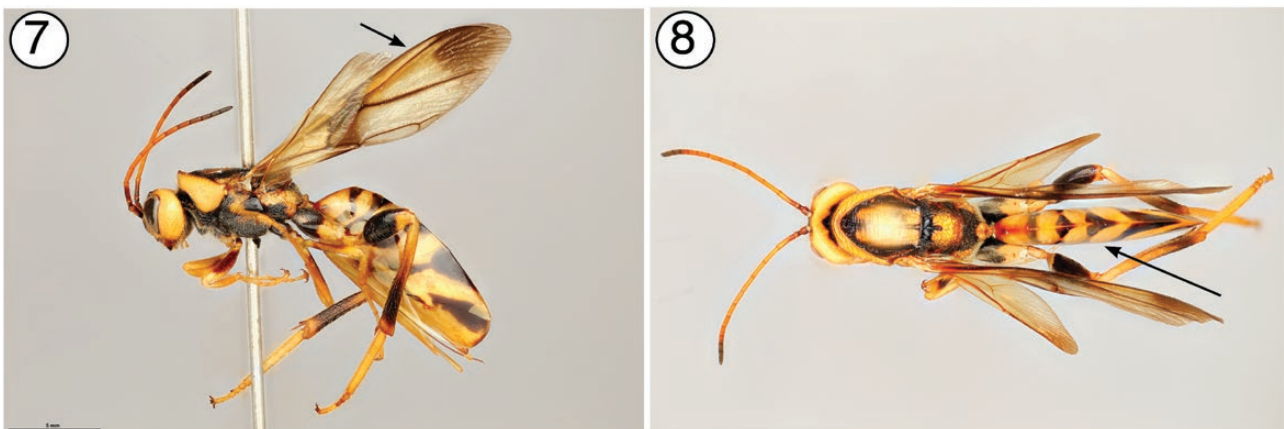

**Figs. 7 and 8.** Fig. 7, *Ibalia anceps*, lateral view. USNMENT01231826. Fig. 8, *Ibalia anceps*, dorsal view. USNMENT01231826.

2. Marginal cell of forewing extremely elongate (9× as long as high) (arrow, **Fig. 7**). Metasoma in dorsal view elongate and very laterally compressed, thin, blade-like (arrow, **Fig. 8**). Large, over 20 mm in length



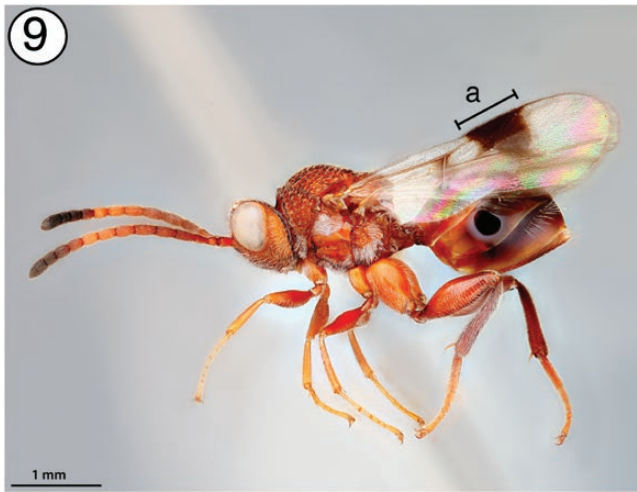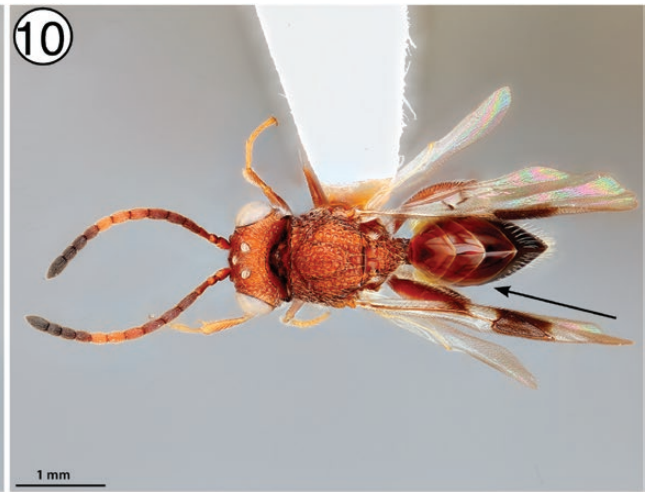

**Figs. 9 and 10.** Fig. 9, *Paramblynotus* sp., lateral view. USNMENT01231832. Fig. 10, *Paramblynotus* sp., dorsal view. USNMENT01231832.  
 — Marginal cell of forewing moderately elongate (3–4× as long as high) (a, Fig. 9). Metasoma in dorsal view rounded, ovate, subcylindrical (arrow, Fig. 10). Size varying, sometimes small, always under 20 mm ..... Liopteridae

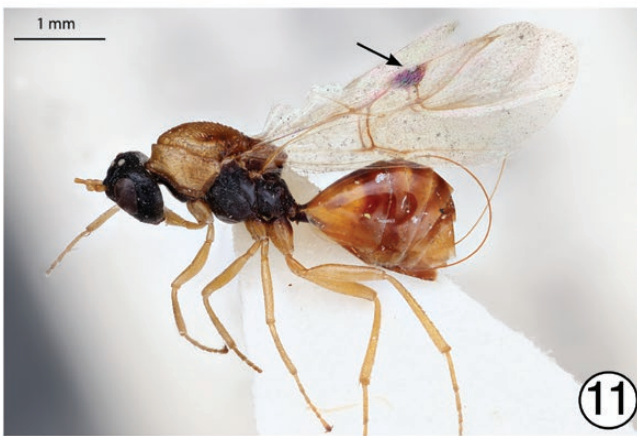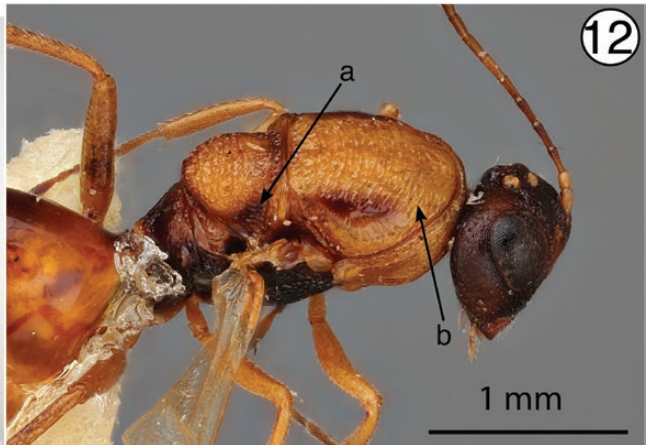

**Figs. 11 and 12.** Fig. 11, *Austrocynips mirabilis* Riek, 1971, lateral view. Holotype, ANIC. Fig. 12, *Austrocynips mirabilis*, lateral view. Holotype, ANIC.  
 3. With a pterostigma (arrow, Fig. 11), always fully winged. No foveae or lateral bars on scutellum (a, Fig. 12). Mesoscutum with well-developed transversal ridges (b, Fig. 12). Australia only, very rare ..... Austrocynipidae



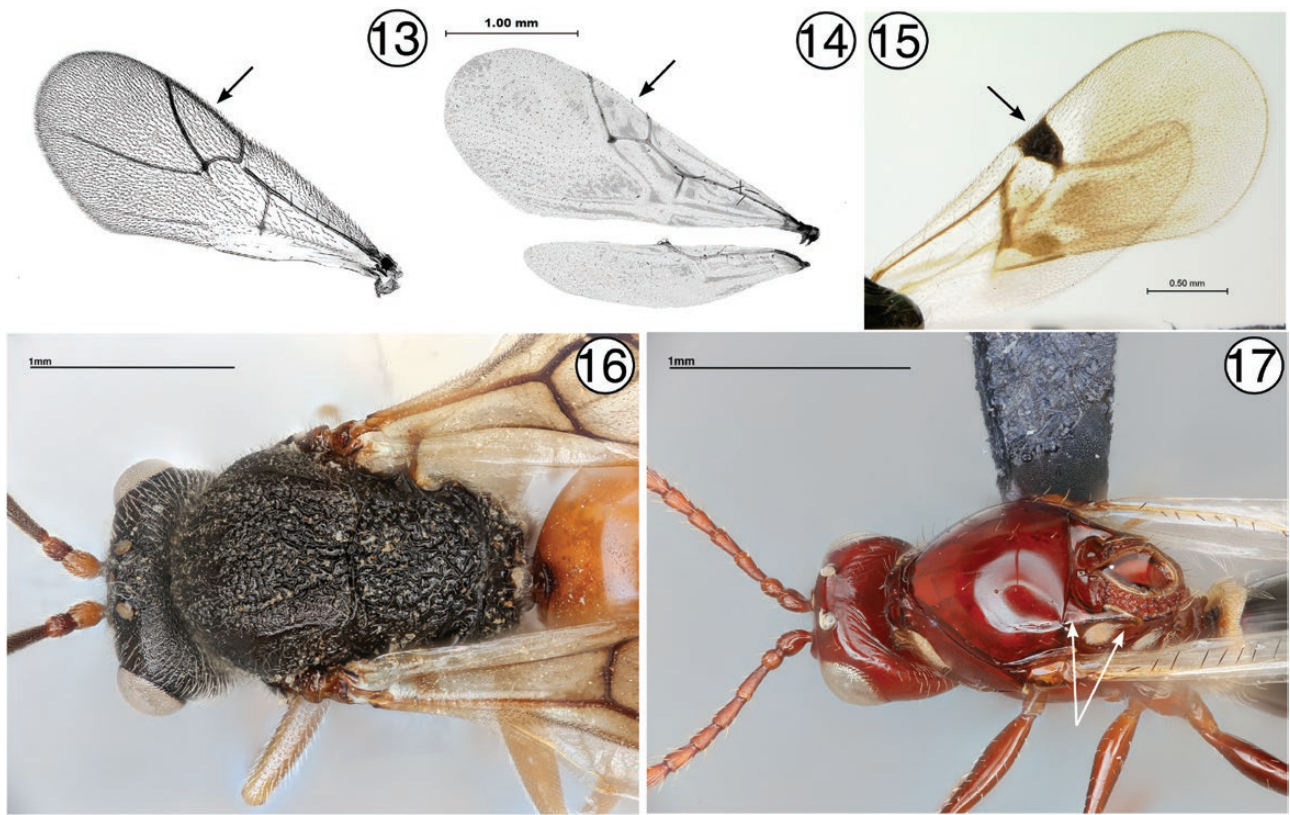

**Figs. 13–17.** Fig. 13, *Euceroptres maritimus* Weld, 1926, fore wings. USNMENT01525886. Fig. 14, *Odontosema anastrephae* Borgmeier, 1935, fore and hind wings. USNMENT00655913. Fig. 15, *Tylosema dayae* Buffington and van Noort, 2007, forewing. SAM-HYM-P0024394. Fig. 16, *Diplolepis bicolor* (Harris, 1852), dorsal view. USNMENT01231831. Fig. 17, *Striatovertex* sp., dorso-lateral view. USNMENT01231830.

— Without a pterostigma (arrows, [Figs. 13](#) and [14](#)) (very rarely the entire marginal cell is pigmented forming a pseudostigma; arrow, [Fig. 15](#)), rarely brachypterous/apterous. Usually with more or less developed foveae and lateral bars of scutellum (arrows, [Fig. 17](#)). Mesoscutum usually without well-developed transversal ridges ([Figs. 16](#) and [17](#)). Worldwide ..... 4

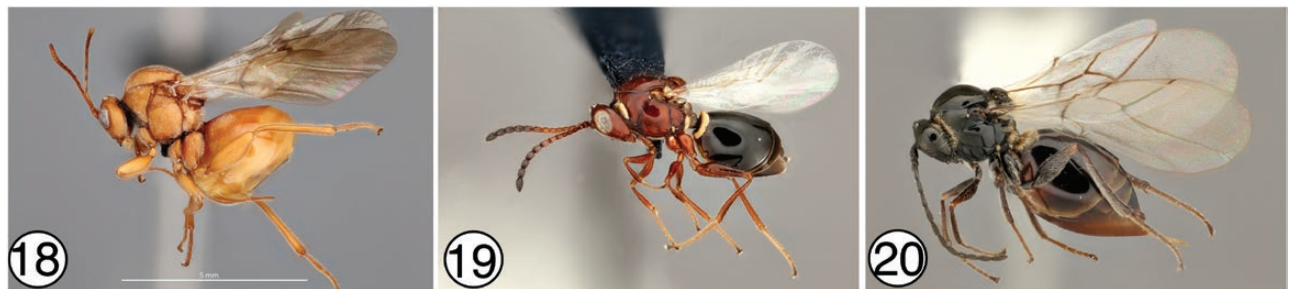

**Figs. 18–20.** Fig. 18, *Andricus quercuscalifornicus* (Bassett, 1881), lateral view. USNMENT01231839. Fig. 19, *Striatovertex* sp., lateral view. USNMENT01231830. Fig. 20, *Trybliographa melanopectera* (Hartig, 1843), lateral view. USNMENT01231838.

4. Fully winged ([Figs. 18–20](#)). Note: brachypterous/wingless forms, or specimens with obscured, tangled or damaged wings, can be identified via this route too ..... 5

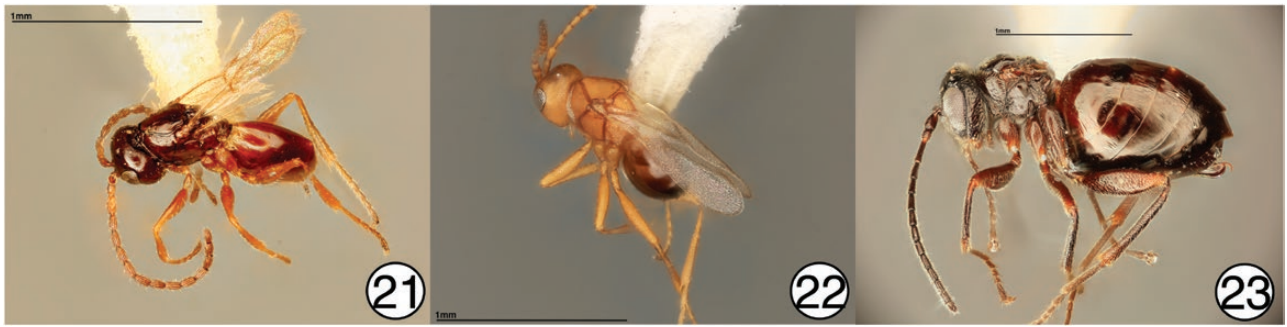

**Figs. 21–23.** Fig. 21, *Kleidotoma* sp., dorso-lateral view. USNMENT01231837. Fig. 22, *Lytoxysta brevipalpis* Kieffer, 1909, dorso-lateral view. USNMENT01231836. Fig. 23, *Phylloteras* sp., lateral view. USNMENT01231835.

— Brachypterous or apterous (Figs. 21–23) (shortcut route to groups where this feature is known) ..... 33

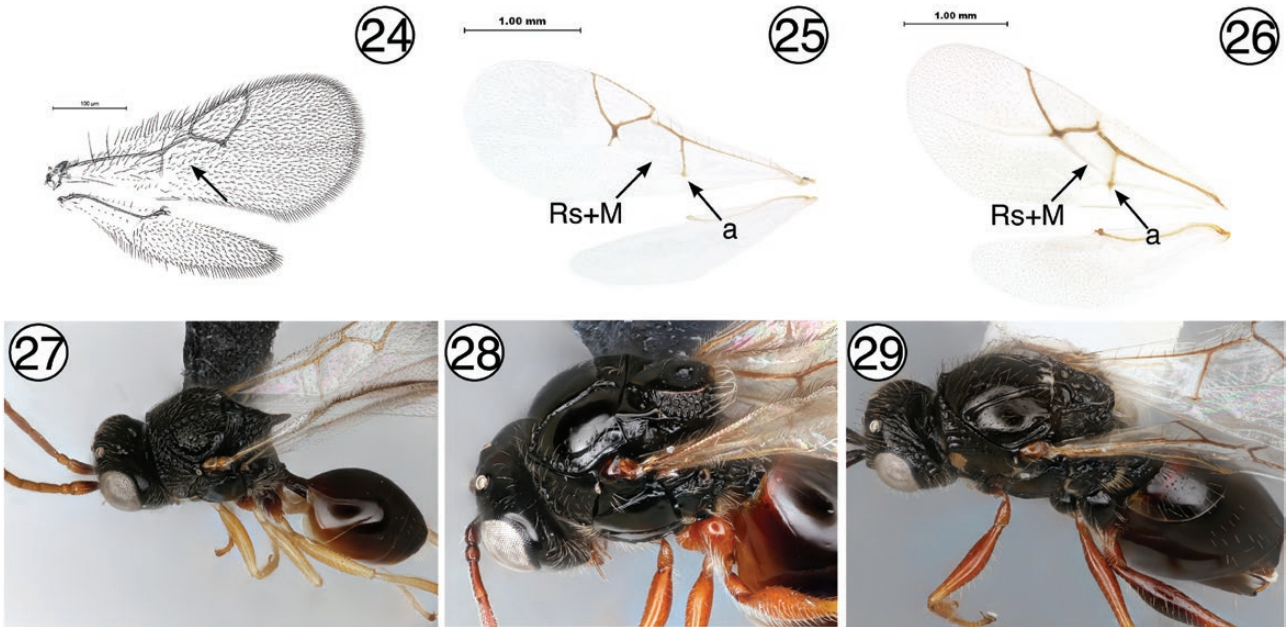

**Figs. 24–29.** Fig. 24, *Zaeucoila robusta* (Ashmead, 1896) fore and hind wings. USNMENT00993082. Fig. 25, *Figites* sp. fore and hind wings. USNMENT00764745. Fig. 26, *Paraspicera bakeri* Kieffer, 1907, fore and hind wings. USNMENT00764748. Fig. 27, *Xyalaspis flavipes* Ashmead, 1896, dorso-lateral view. USNMENT01231844. Fig. 28, *Gronotoma* sp., dorso-lateral view. USNMENT01231843. Fig. 29, *Figites* sp., dorso-lateral view. USNMENT01231842.

5. Rs+M vein often indistinct or absent (arrow, Fig. 24); its proximal part, when present as a faint vein (Fig. 26) or a fold (Fig. 25) joins basal vein at ventral end of basal vein (a, Fig. 26). Areolet usually absent. Usually head and mesosoma shiny (Figs. 28 and 29), rarely rugose or matte (Fig. 27). Scutellum often complex, with differentiated structures such as, plates, spines etc ..... 6



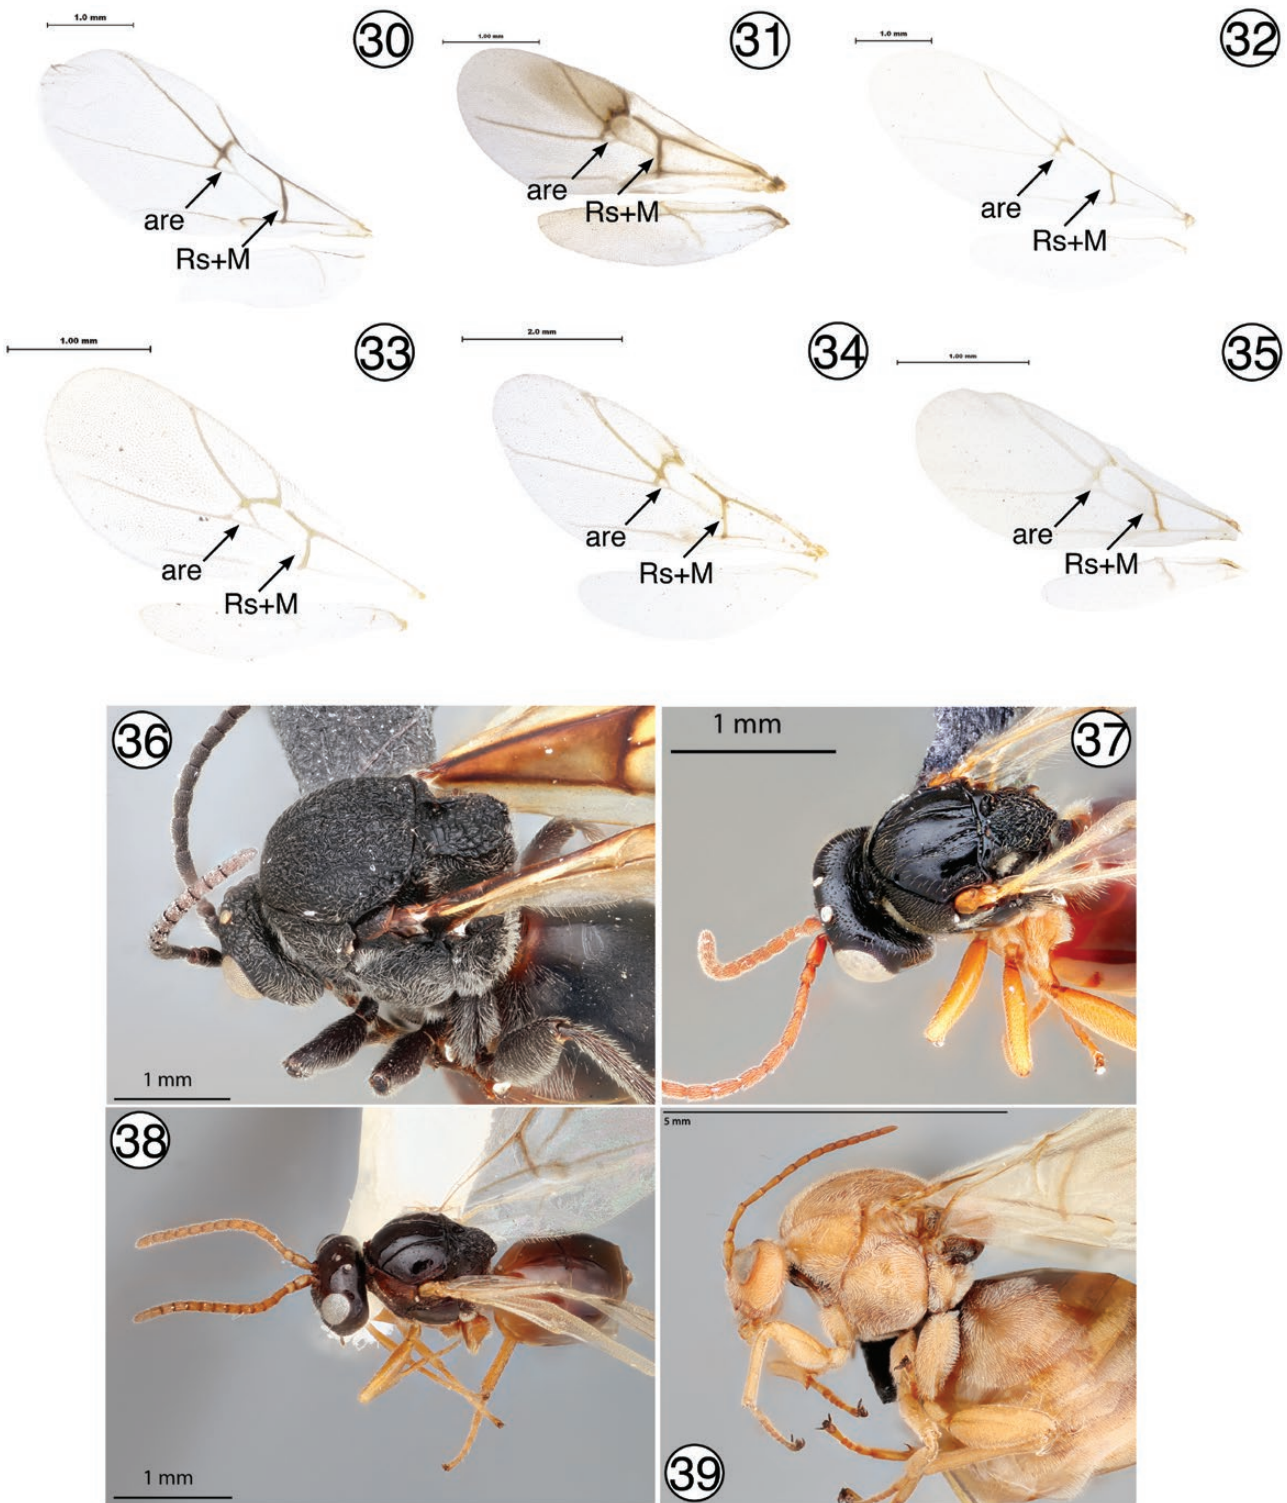

**Figs. 30–39.** Fig. 30, *Cerroneuroterus* sp., fore and hind wings. USNMMENT00655874. Fig. 31, *Diplolepis rosae* (Linnaeus, 1758) fore and hind wings. USNMMENT00655959. Fig. 32, *Biorhiza eburnea* (Bassett, 1890), fore and hind wings. USNMMENT00655850. Fig. 33, *Synophromorpha sylvestris* (Osten-Sacken, 1861), fore and hind wings. USNMMENT00764755. Fig. 34, *Plagiotrochus suberi* Weld, 1926, fore and hind wings. USNMMENT00655825. Fig. 35, *Neuroterus quercusirregularis* (Osten-Sacken, 1861), fore and hind wings. USNMMENT00655854. Fig. 36, *Amphibolips hidalgoensis*, dorso-lateral view. USNMMENT01231834. Fig. 37, *Diastrophus kinkaidii* Gillette, 1893, dorso-lateral view. USNMMENT01448499. Fig. 38, *Dryocosmus kuriphilus* sp., dorso-lateral view. USNMMENT01231850. Fig. 39, *Andricus sternlichti* Bellido, Pujade-Villar & Melika, 2003, lateral view. USNMMENT01231841.

— Rs+M starts at (or points towards) mid-length of basal vein (Rs+M, Figs. 30–35). Aerolet often present (are, Figs. 30–35). Usually large parts of head and mesosoma matte (Figs. 36 and 39), rarely smooth/shiny (Figs. 37 and 38). Scutellum distinct structure other than general fovea or rugosity (most of Cynipidae) ..... 8



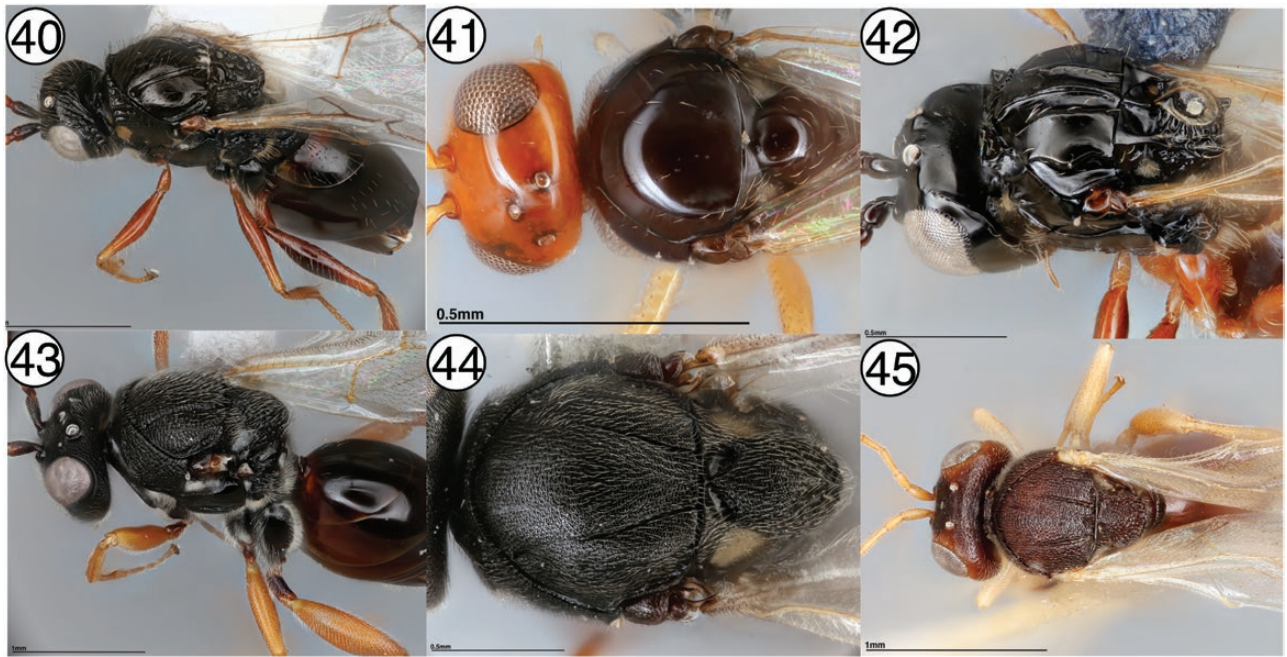

**Figs. 40–45.** Fig. 40, *Figites* sp., dorso-lateral view. USNMENT01231842. Fig. 41, *Alloxysta* sp., dorsal view. USNMENT01231840. Fig. 42, *Dettmeria* sp., dorso-lateral view. USNMENT01231849. Fig. 43, *Euceroptres maritimus*, dorso-lateral view. USNMENT01231848. Fig. 44, *Melanips* sp., dorsal view of mesosoma. USNMENT01231847. Fig. 45, *Synergus incisus* Gillette, 1896, dorsal view. USNMENT01231859.

- 6. Head, pronotum and mesoscutum shiny, more or less smooth, and usually not densely pubescent (Figs. 40–42) (most of Figitidae) ..... 19
- Head, pronotum and mesoscutum matte from dense microsculpture, and more or less densely pubescent (Figs. 43–45) ..... 7

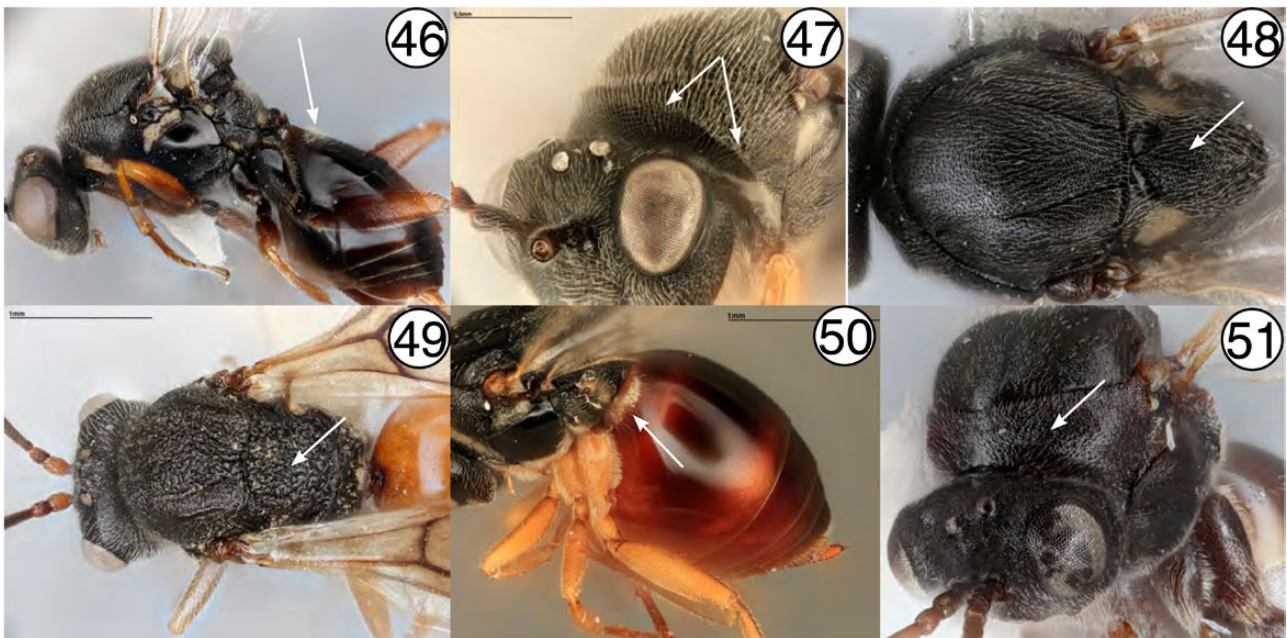

**Figs. 46–51.** Fig. 46, *Melanips* sp., lateral view. USNMENT01231847. Fig. 47, *Euceroptres maritimus*, pronotum, antero-lateral view. USNMENT01231848. Fig. 48, *Melanips* sp., mesosoma, dorsal view. USNMENT01231847. Fig. 49, *Diplolepis bicolor*, dorsal view. USNMENT01231831. Fig. 50, *Diastrophus kinkaidii*, metasoma, lateral view. USNMENT01448499. Fig. 51, *Isocolus tinctorius* Melika & Gharaei, 2006, antero-dorsal view. USNMENT01231846.

- 7. With dense pubescence on base of metasoma (arrow, Fig. 46). Usually with distinct pronotal plate (arrows, Fig. 47). Often with complex structure on scutellum (arrow, Fig. 48) (some Figitidae) ..... 19
- Usually without dense pubescence on base of metasoma (Fig. 49) but sometimes with small lateral patch (arrow, Fig. 50). Usually without distinct pronotal plate (arrow, Fig. 51). Always with a relatively simple scutellum dominated by evenly distributed fovea or rugosity (arrow, Fig. 49) (some Cynipidae) ..... 8



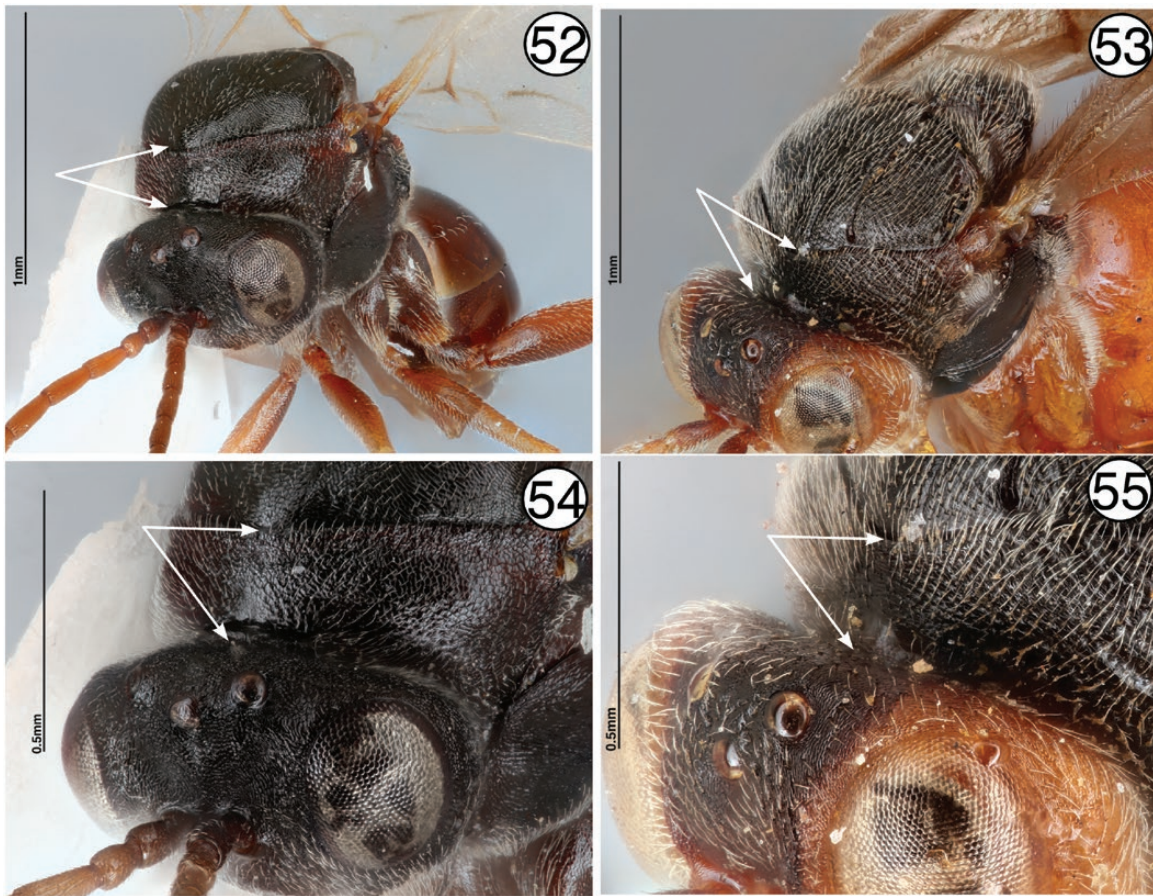

**Figs. 52–55.** Fig. 52, *Isocolus tinctorius*, antero-dorsal view. USNMENT01231846. Fig. 53, *Synergus atripennis* Ashmead, 1896, antero-dorsal view. USNMENT01231845. Fig. 54, *Isocolus tinctorius*, antero-dorsal view. USNMENT01231846. Fig. 55, *Synergus atripennis*, antero-dorsal view. USNMENT01231845. 8. Pronotum high, dorsomedially at least 1/5, usually 1/3, as long as greatest length of pronotum laterally (arrows, Figs. 52–55). The median area of pronotum with two submedian pits and often more or less sharply defined lateral demarcations. Pronotal plate present or absent ..... 9



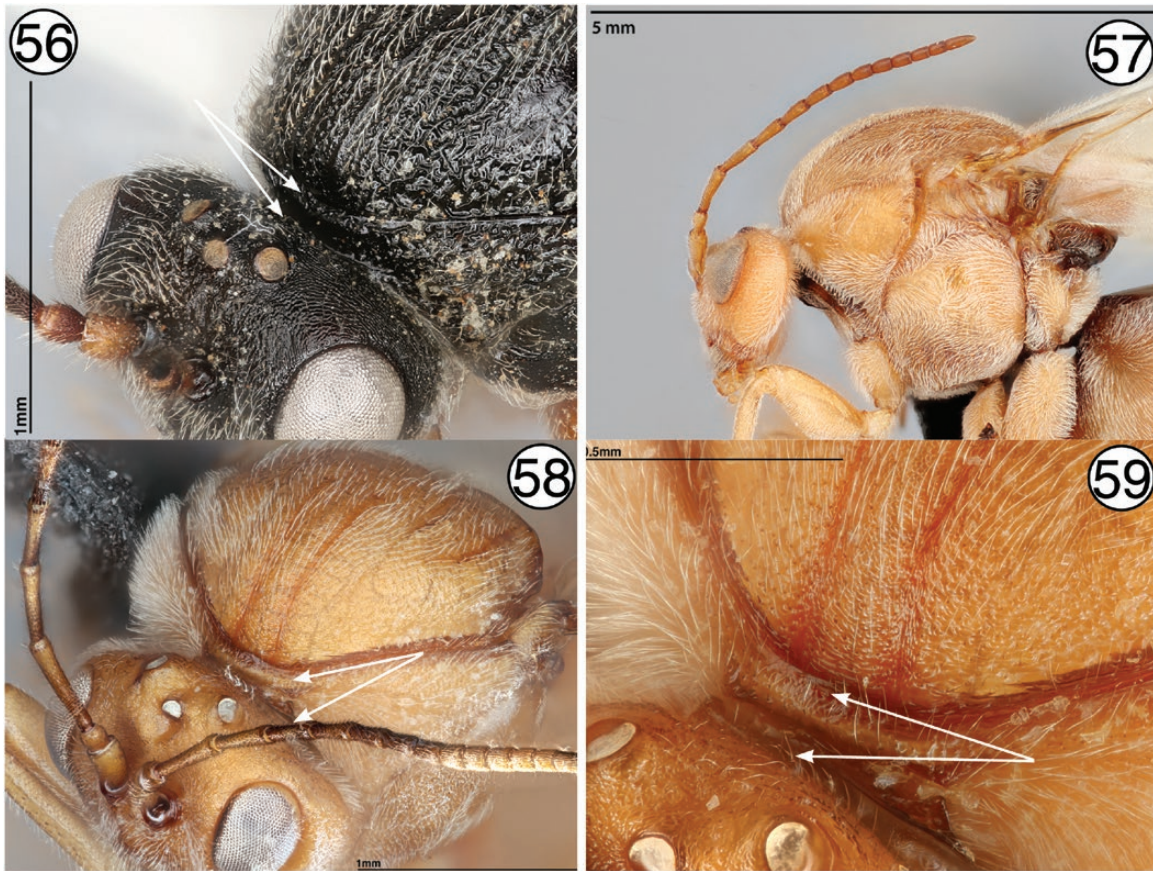

**Figs. 56–59.** Fig. 56, *Diplolepis bicolor*, antero-dorsal view. USNMENT01231831. Fig. 57, *Andricus quercuscalifornicus*, lateral view. USNMENT01231839. Fig. 58, *Andricus quercuscalifornicus*, antero-dorsal view. USNMENT01231839. Fig. 59, *Andricus quercuscalifornicus*, antero-dorsal view. USNMENT01231839. — Pronotum low, dorsomedially short, 1/7 or less compared to length of pronotum laterally (arrows, Figs. 56–59). Median area of pronotum without well-defined structures, at most with superficial depressions. Pronotal plate always absent ..... 17

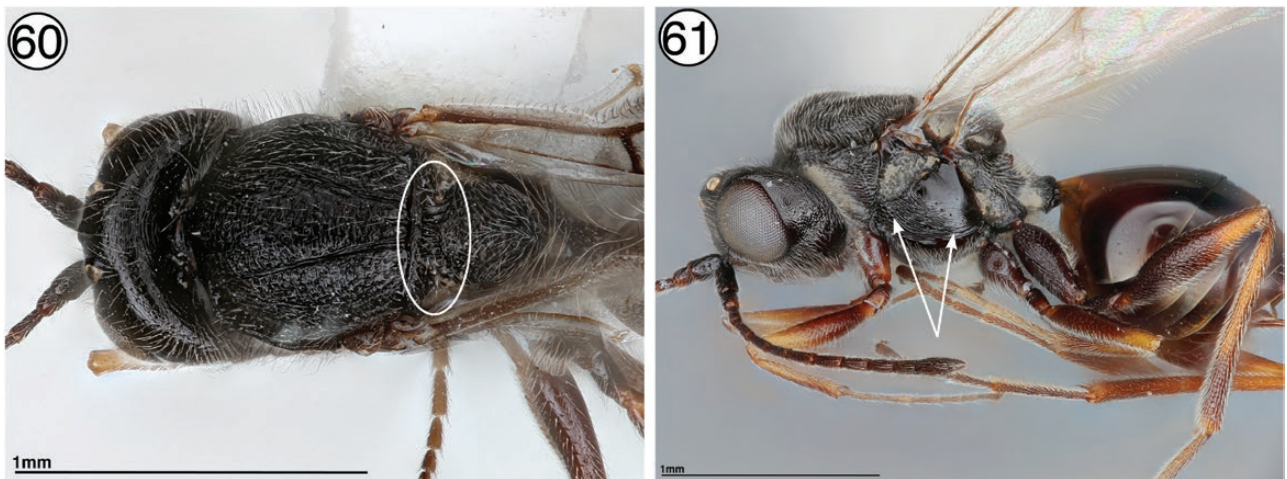

**Figs. 60 and 61.** Fig. 60, *Paraulax queulensis* Nieves-Aldrey and Liljeblad, 2009, dorsal view. USNMENT01231854. Fig. 61, *Paraulax queulensis*, lateral view. USNMENT01231854.

9. Scutellar foveae shallow, usually faint to completely absent (oval, Fig. 60). Mesopleuron with a median longitudinal mesopleural impression, sometimes very faint (arrows, Fig. 61) or absent. Inhabiting galls on *Nothofagus* or inducing galls on *Acer* (including the genus *Hymalocynips* from Nepal with biology unknown). Rarely encountered ..... 10



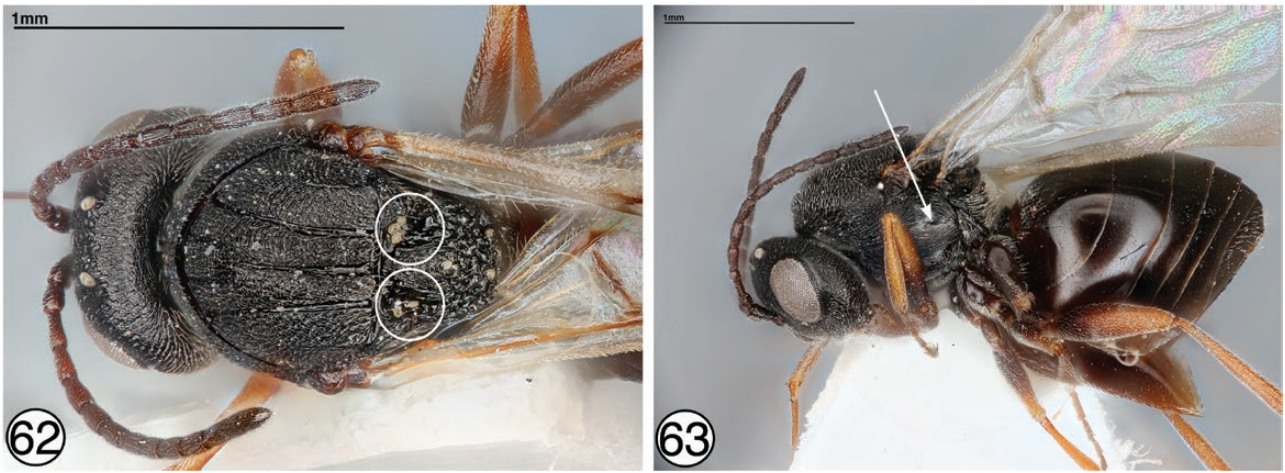

**Figs. 62 and 63.** Fig. 62, *Aulacidea irani* Melika & Gharaei, 2006, dorsal view. USNMENT01231853. Fig. 63, *Aulacidea irani*, lateral view. USNMENT01231853.  
 — Scutellar foveae usually well differentiated and deep, sometimes confluent and forming a transverse depression (circles, Fig. 62). Mesopleuron without a median longitudinal impression (arrow, Fig. 63) ..... 11

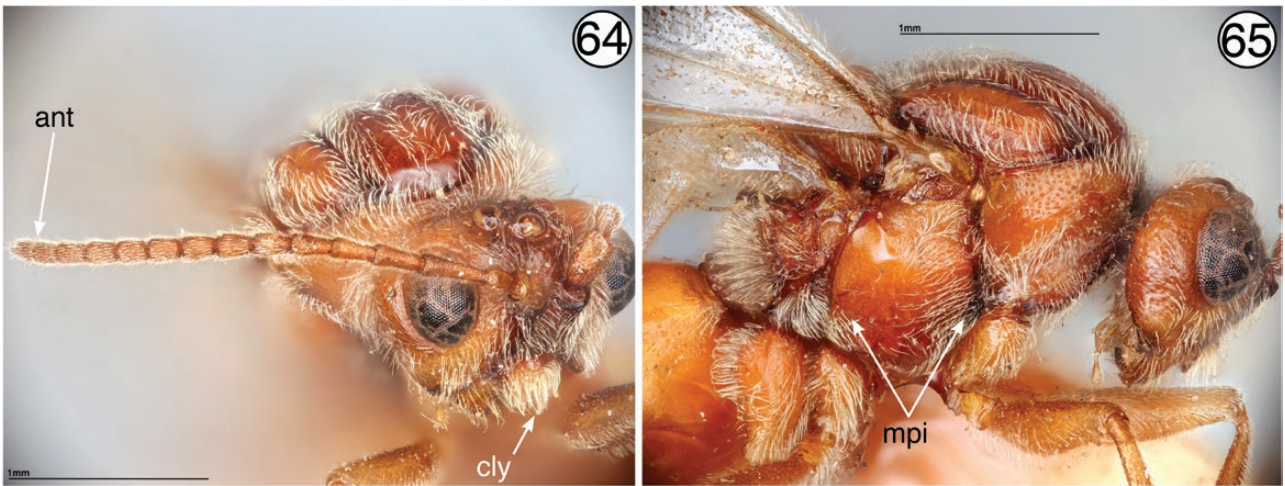

**Figs. 64 and 65.** Fig. 64, *Pediaspis aceris* (Gmelin, 1790), antero-lateral view. USNMENT01231852. Fig. 65, *Pediaspis aceris*, lateral view. USNMENT01231852.  
 10. Female antenna with 12 or more flagellomeres; last flagellomere not wider than the penultimate (ant, Fig. 64); male antenna without modified F1. Ventral area of gena without vertical carinae, genal carina absent. Ventral part of clypeus broadly projecting over mandibles (cly, Fig. 64). Dorsolateral margin of pronotal plate not projecting laterad (Fig. 65). Mesopleural impression absent or faint (mpi, Fig. 65). Profemur not modified. Palearctic gall-inducers on *Acer* or biology unknown ..... Pediaspidini

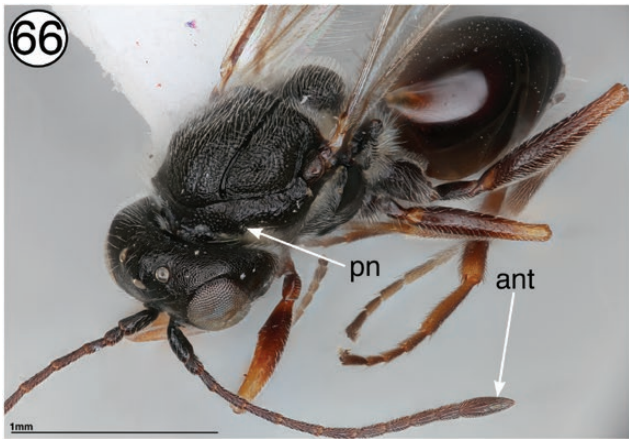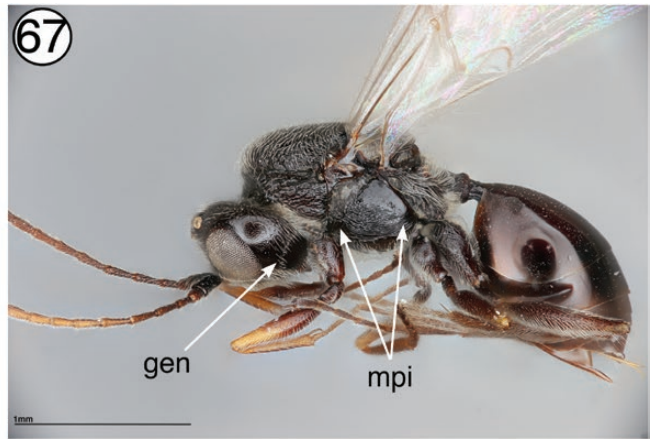

**Figs. 66 and 67.** Fig. 66, *Cecinothophagus* sp., antero-dorsal view. USNMMENT01231851. Fig. 67, *Cecinothophagus* sp., lateral view. USNMMENT01231851.

— Female antenna with 10 flagellomeres; last flagellomere wider than the penultimate (ant, Fig. 66); male antenna with either F2, F3 or both modified. Ventral area of gena with 5–9 vertical carinae (gen, Fig. 67). Genal carina present. Ventral part of clypeus at most slightly projecting over mandibles. Dorsolateral margin of pronotal plate strongly projecting laterad (pn, Fig. 66). Mesopleural impression present (mpi, Fig. 67). Profemur with ventral swelling composed of 4–5 rows of sharp, closely spaced, deep costulae. Associated with Neotropical galls on *Nothofagus* .....Paraulacini

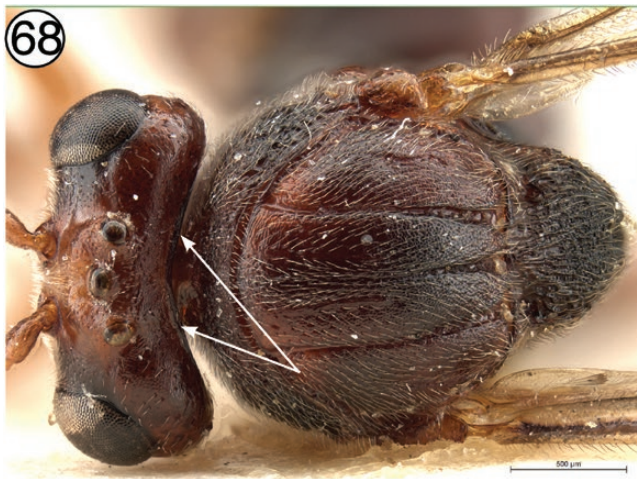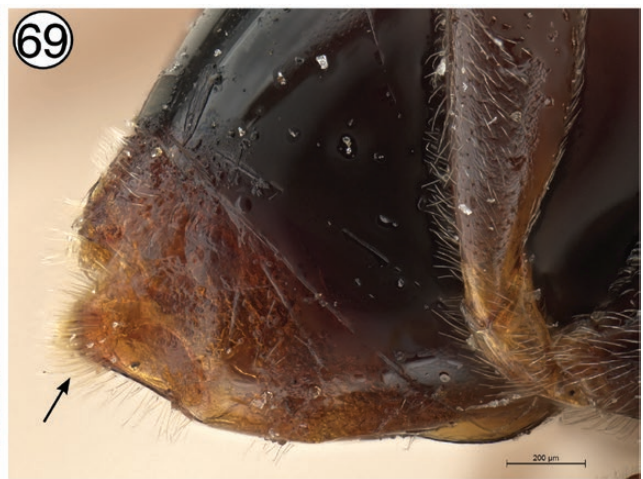

**Figs. 68 and 69.** Fig. 68, *Qwaqwaia scolopiae* Liljeblad, Nieves-Aldrey & Melika, 2006, dorsal view. SAMHYMP044067. Fig. 69, *Qwaqwaia scolopiae*, metasoma, lateral view. SAMHYMP044067.

11. Occiput with strong and sharp occipital carina (arrows, Fig. 68). Hypopygium abrupt, not prolonged into a ventral spine; with a dense tuft of long setae (arrow, Fig. 69). South African gall-inducers on *Scolopia*. Rarely encountered .....Qwaqwaiini



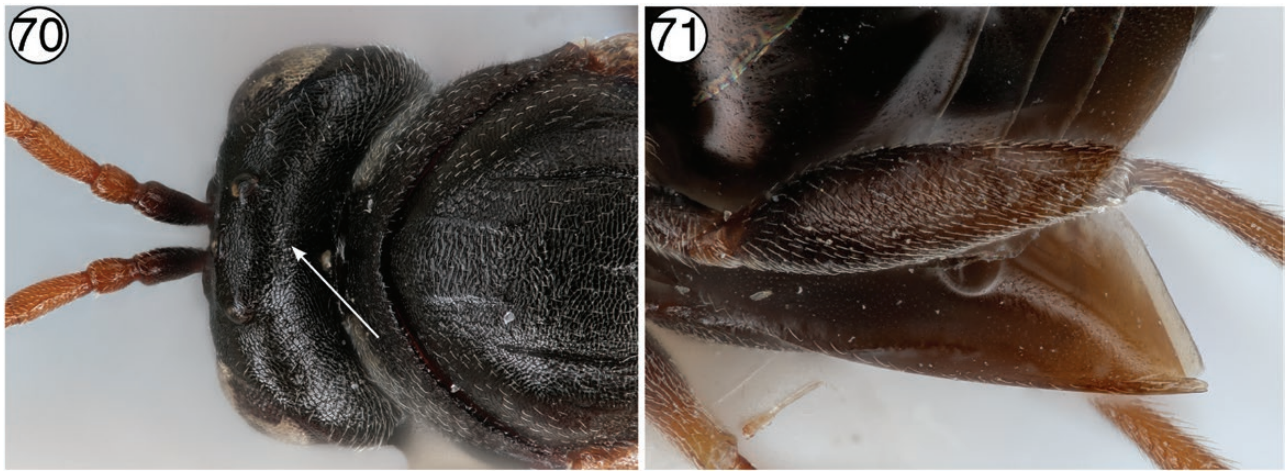

**Figs. 70 and 71.** Fig. 70, *Aulacidea irani*, head, dorsal view. USNMMENT01231853. Fig. 71, *Aulacidea irani*, hypopygium, lateral view. USNMMENT01231853.  
 — Occiput without distinct and sharp occipital carina (arrow, Fig. 70), sometimes with some strong parallel occipital rugae. Hypopygium with more or less distinct, elongated, needle-like ventral spine, with subapical setae never forming a dense tuft (Fig. 71) ..... 12

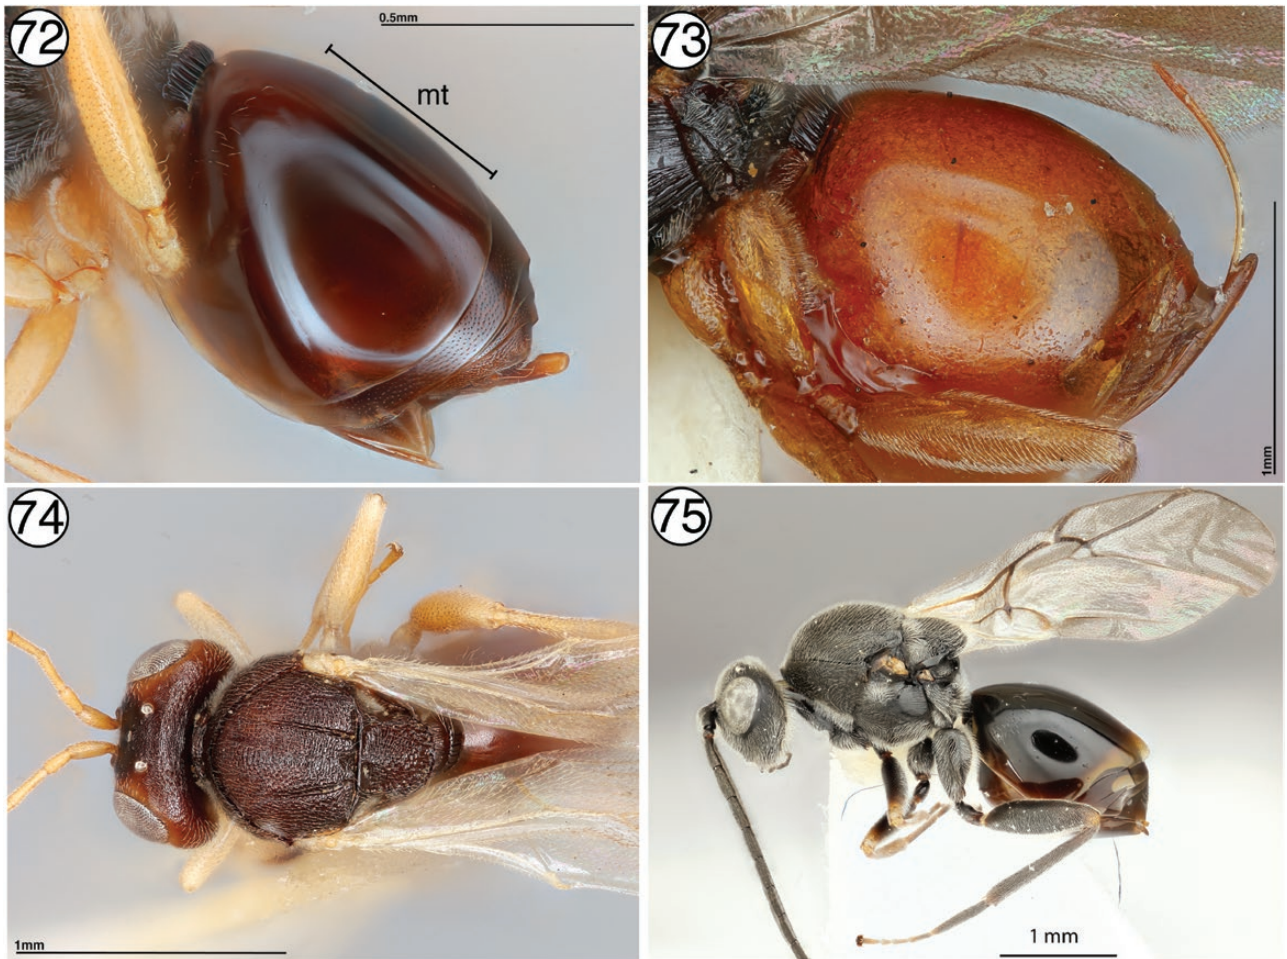

**Figs. 72–75.** Fig. 72, *Synergus* sp., metasoma, lateral view. USNMMENT01231858. Fig. 73, *Synergus atripennis*, metasoma, lateral view. USNMMENT01231845. Fig. 74, *Synergus incisus*, dorsal view. USNMMENT01231859. Fig. 75, *Synophrus politus* Hartig, 1843, lateral view. USNMMENT01231857.  
 12. Metasomal terga 2 + 3 fused, or apparently fused, with or without a suture between terga 2 and 3; metasoma appears as one large segment (Figs. 72 and 73), sometimes with indistinct and continuous suture between these terga in either sex. Head and mesosoma almost always sculptured (Figs. 74 and 75). Metasoma anteroventrally angled, relative to midline, in lateral view (mt, Fig. 72). Holarctic and Oriental inquiline in galls ..... 13



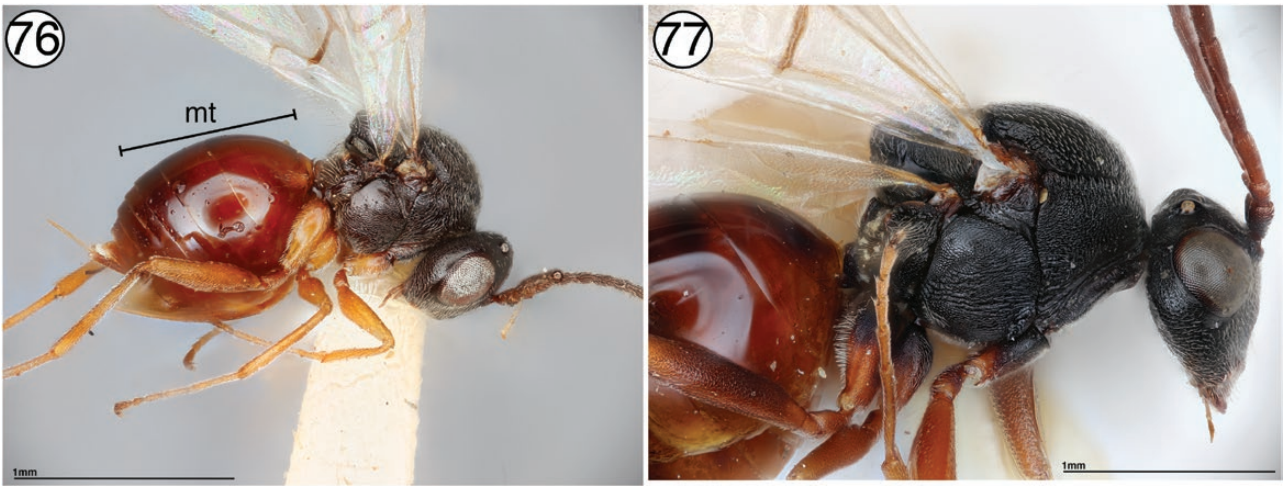

**Figs. 76 and 77.** Fig. 76, *Aylax papaveris* (Perris, 1841), lateral view. USNMENT01231856. Fig. 77, *Barbotinia oraniensis* (Barbotin, 1964), lateral view. USNMENT01448491.

— Terga 2–7 free in most cases (Fig. 76); if terga 2 + 3 fused in females into one large segment then head and mesosoma almost always smooth and shiny (otherwise, head and mesosoma sculptured) (Fig. 77). Metasoma usually more or less oval in lateral view (mt, Fig. 76. Holarctic gall-inducers on herbaceous plants or *Rubus* ..... 14

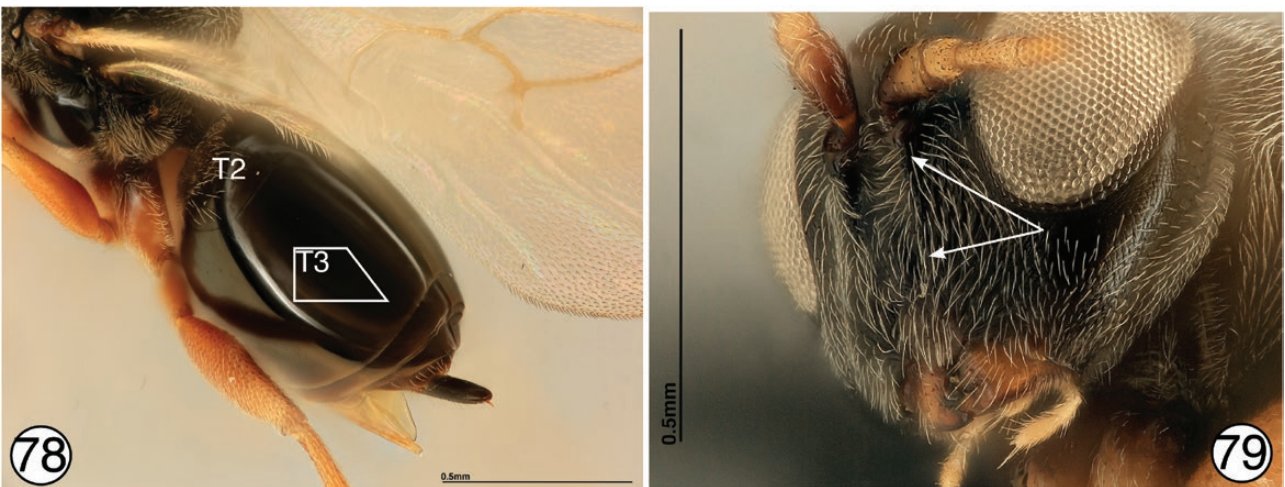

**Figs. 78 and 79.** Fig. 78, *Ceroptres* sp., metasoma, lateral view. USNMENT00917016. Fig. 79, *Ceroptres* sp., head, anterior view. USNMENT00917016.

13. Metasomal T2 separated from T3 by suture; T2 much smaller than T3 (Fig. 78); first tergum hardly visible (Fig. 78). Depression present ventral of torulus (arrows, Fig. 79). Upper face, mesopleuron and vertex smooth. Metasoma hair patch often present. Pronotal plate complete ..... Ceroptresini

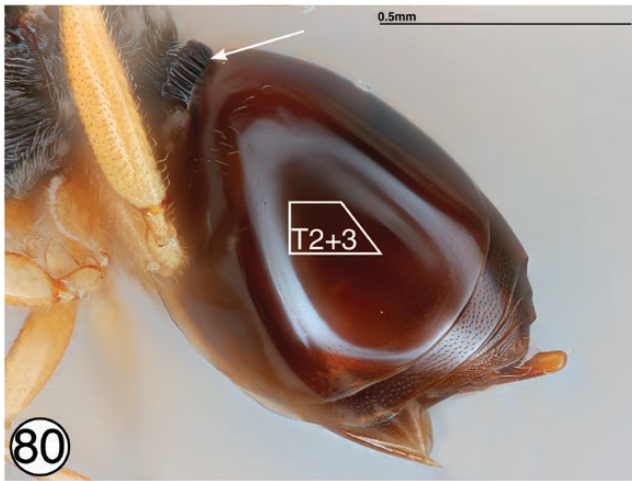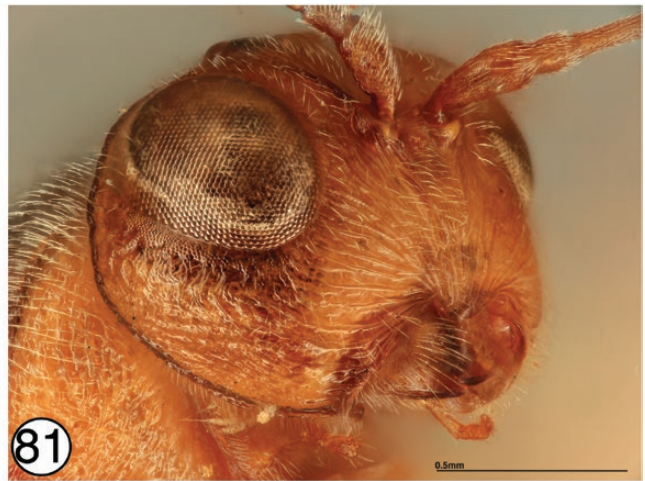

**Figs. 80 and 81.** Fig. 80, *Synergus* sp. Metasoma, lateral view. USNMENT01231858. Fig. 81, *Synergus lignicola* (Osten-Sacken, 1862), head, anterior view. USNMENT01448497.

— Second and third tergum of metasoma fused into syntergum (T2 + 3, Fig. 80); no suture present between T2 and T3; first tergum relatively large, ring-like, longitudinally sulcate (arrow, Fig. 80). Depression absent ventral of torulus (though striae frequently present) (Fig. 81). Upper face, mesopleuron and vertex with various degrees of sculpture, not smooth. Pronotal plate incomplete dorsally .....Synergini

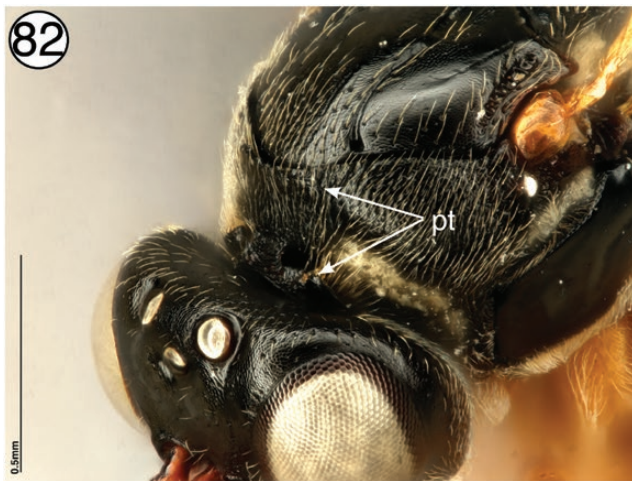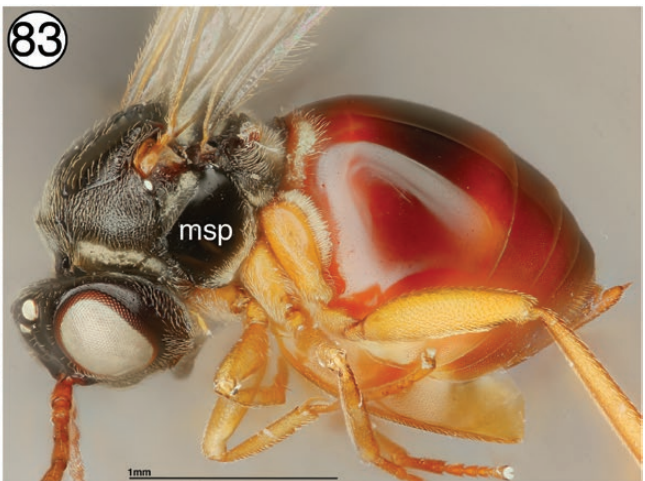

**Figs. 82 and 83.** Fig. 82, *Diastrophus kinkaidii*, antero-dorsal view. USNMENT01448499. Fig. 83, *Diastrophus kinkaidii*, lateral view. USNMENT01448499.

14. Pronotal plate present, defined dorsally and ventrally (pt, Fig. 82). Mesopleuron and mesosoma smooth (msp, Fig. 83). Most females with 10 flagellomeres in antenna. Metatarsal claws with distinct lobe. Gallers and inquilines on Rosaceae, or host unknown ..... Diastrophini



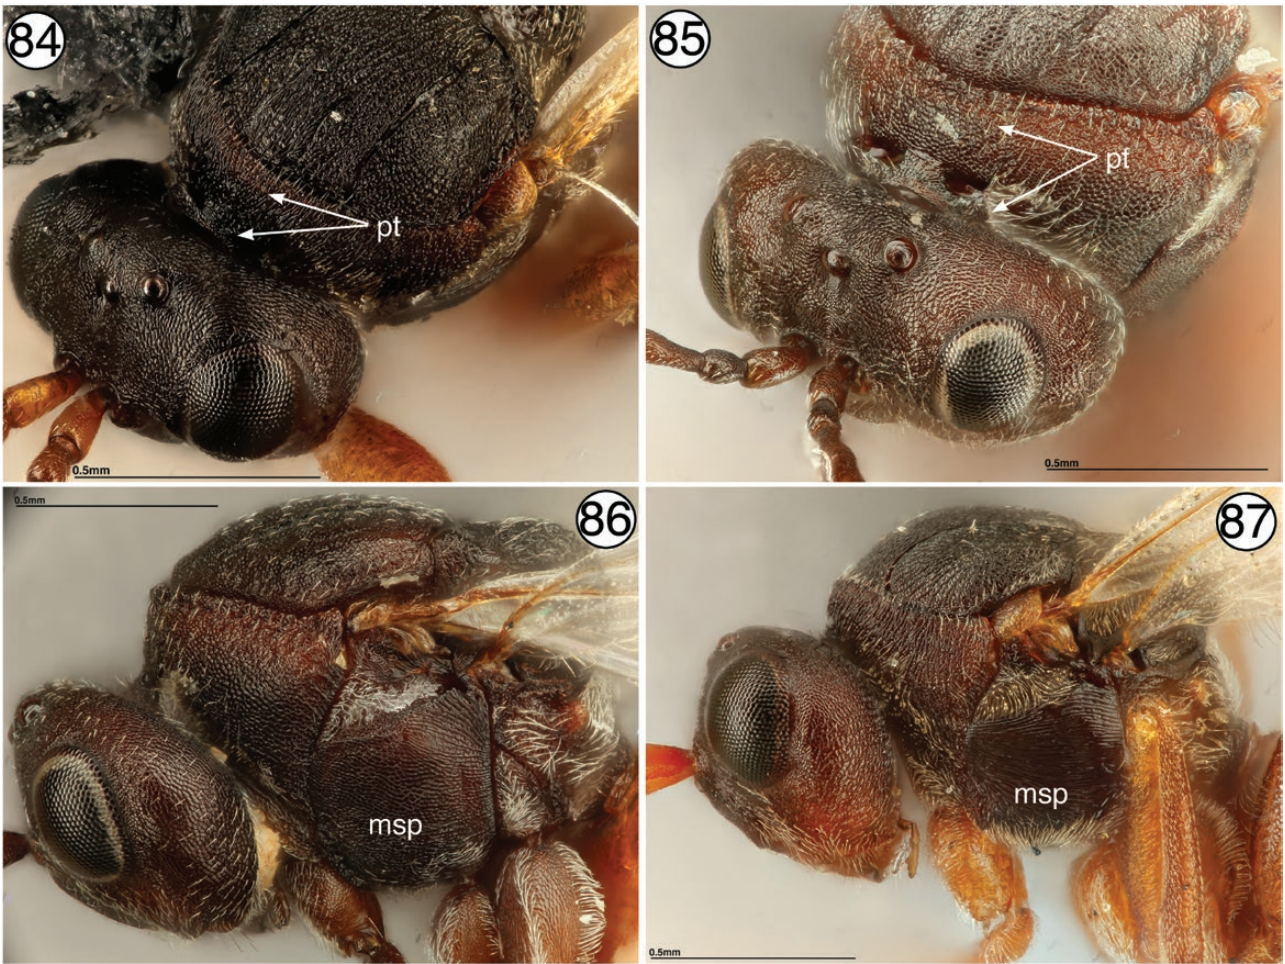

**Figs. 84–87.** Fig. 84, *Aulacidea podagrae* (Bassett, 1890), antero-dorsal view. USNMENT01448495. Fig. 85, *Antistrophus laciniatus* Gillette, 1891, antero-dorsal view. USNMENT01448496. Fig. 86, *Antistrophus laciniatus*, lateral view. USNMENT01448496. Fig. 87, *Aulacidea podagrae*, lateral view. USNMENT01448495.

— Pronotal plate incomplete, not defined dorsally (pt, Figs. 84 and 85). Mesopleuron and mesosoma sculptured to various degrees (msp, Figs. 86 and 87). Most females with more than 10 flagellomeres in antenna. Metatarsal claws simple. Gallers on various herbaceous plants ..... 15

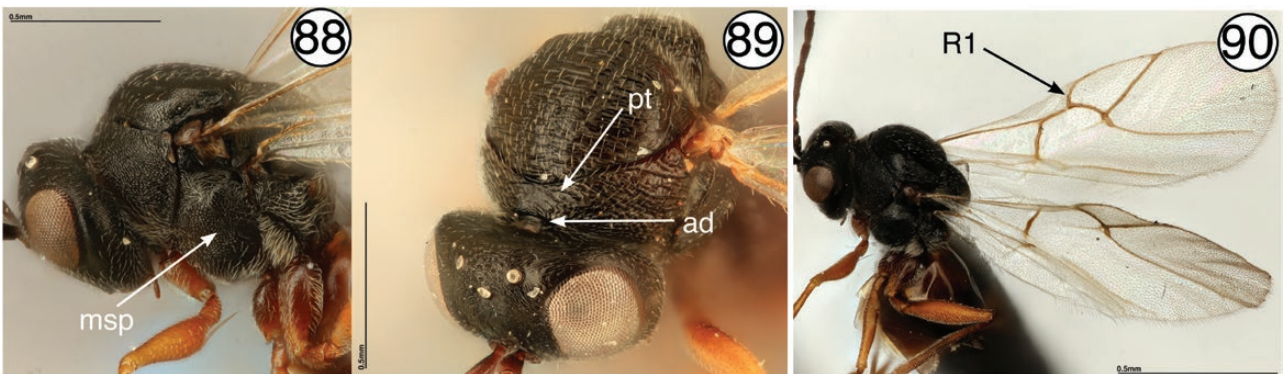

**Figs. 88–90.** Fig. 88, *Phanacis* sp., lateral view. USNMENT01448498. Fig. 89, *Phanacis* sp., antero-dorsal view. USNMENT01448498. Fig. 90, *Phanacis* sp., forewings. USNMENT01231855.

15. Mesopleuron with reticulate or rugulose sculpture (msp, Fig. 88). Submedian depressions on pronotal plate effaced, shallow, and indistinct (ad, Fig. 89). Dorsal part of pronotal plate not reaching mesoscutum (pt, Fig. 89). R1 in forewing reaching anterior margin of wing (R1, Fig. 90), and marginal cell at least partially closed (Fig. 90). Gallers on Asteraceae, rarely on other plants .....Phanacidini



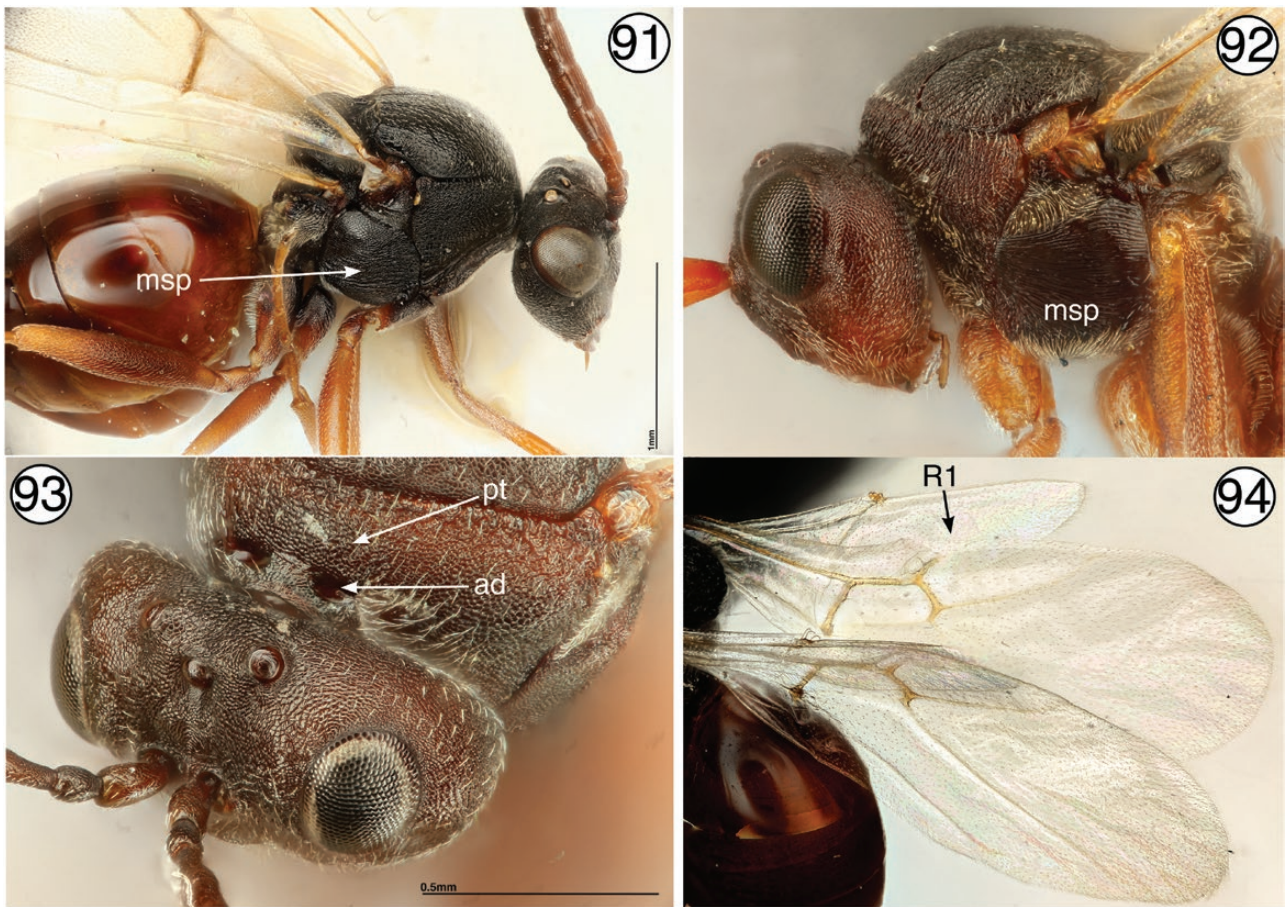

**Figs. 91–94.** Fig. 91, *Barbotinia oraniensis*, lateral view. USNMENT01448491. Fig. 92, *Aulacidea podagrae*, lateral view. USNMENT01448495. Fig. 93, *Antistrophus laciniata*, antero-dorsal view. USNMENT01448496. Fig. 94, *Antistrophus laciniata*, forewings. USNMENT01448496.

— Mesopleuron longitudinally striate, striate-reticulate, or smooth, never rugulose (msp, **Figs. 91** and **92**). Submedian depressions of pronotal plate present, typically separated (ad, **Fig. 93**). Dorsal part of pronotal plate typically reaching mesoscutum. R1 of forewing reaching or not reaching wing margin (R1, **Fig. 94**). Marginal cell open or closed (**Fig. 94**)..... 16

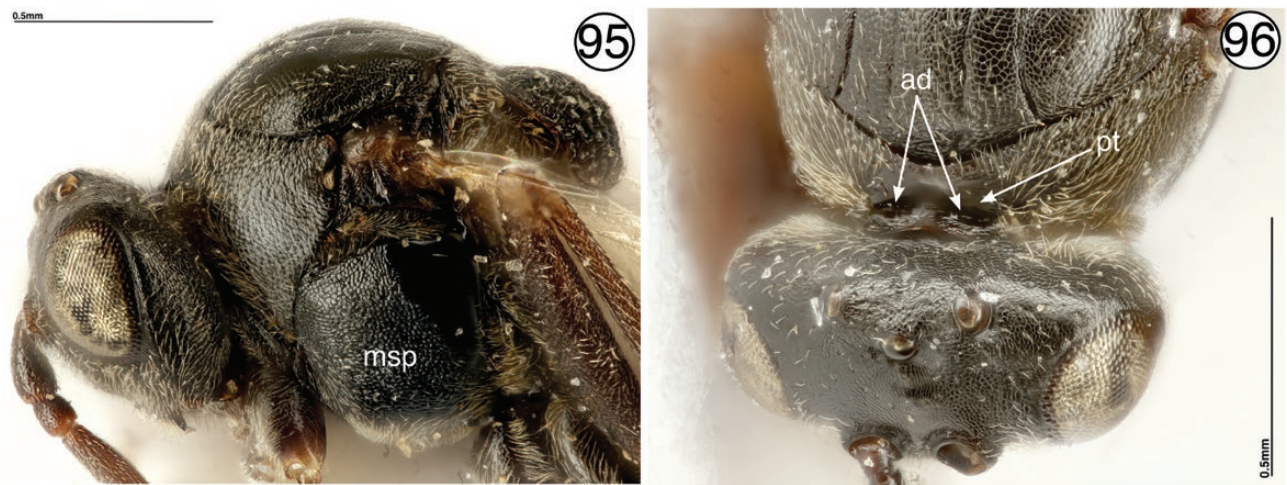

**Figs. 95 and 96.** Fig. 95, *Iraella ionescui* Pujade-Villar & Schiopu, 2015, lateral view. USNMENT01231864. Fig. 96, *Iraella ionescui*, antero-dorsal view. USNMENT01231864.

16. Mesopleuron striate-reticulate or reticulate (msp, **Fig. 95**); female antenna with 12 flagellomeres; pronotum (in dorsal view) short, about 1/5 as long as greatest length of outer margin (pt, **Fig. 96**); admedian depressions narrowly separated and strongly transverse (ad, **Fig. 96**); galls on *Papaver* (Papaveraceae) .....Aylacini



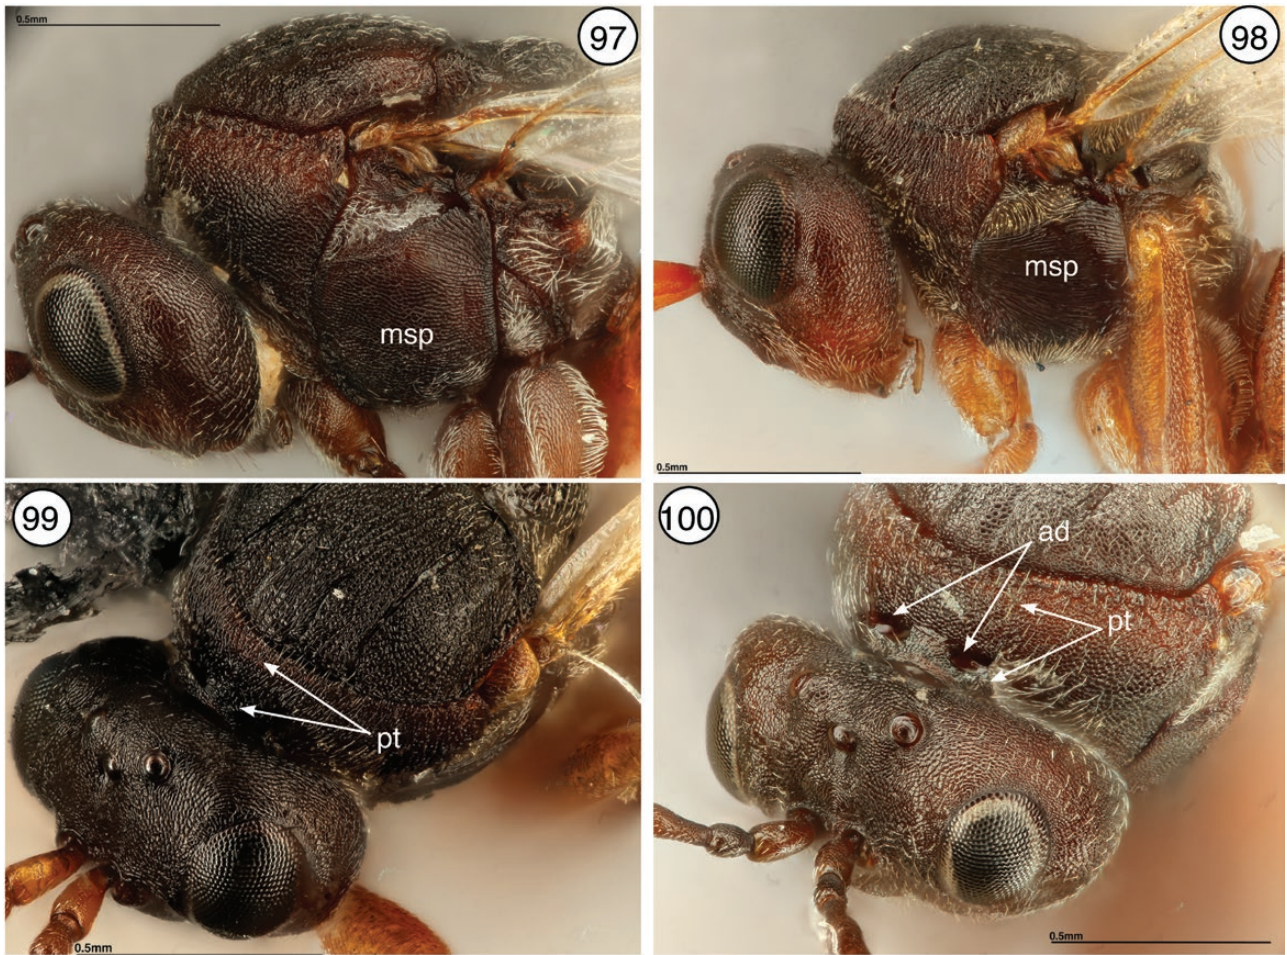

**Figs. 97–100.** Fig. 97, *Antistrophus laciniata*, lateral view. USNMENT01448496. Fig. 98, *Aulacidea podagrae*, lateral view. USNMENT01448495. Fig. 99, *Aulacidea podagrae*, antero-dorsal view. USNMENT01448495. Fig. 100, *Antistrophus laciniata*, antero-dorsal view. USNMENT01448496.

— Mesopleuron longitudinally striate (msp, Figs. 97 and 98); female antenna with 10–11 flagellomeres; pronotum (in dorsal view) longer, about 1/3 to 1/4 as long as greatest length of outer margin (pt, Figs. 99 and 100); admedian depressions oval or round, usually more widely separated (ad, Fig. 100); galls on Asteraceae, Lamiaceae, Valerianaceae, and Papaveraceae ..... Aulacideini



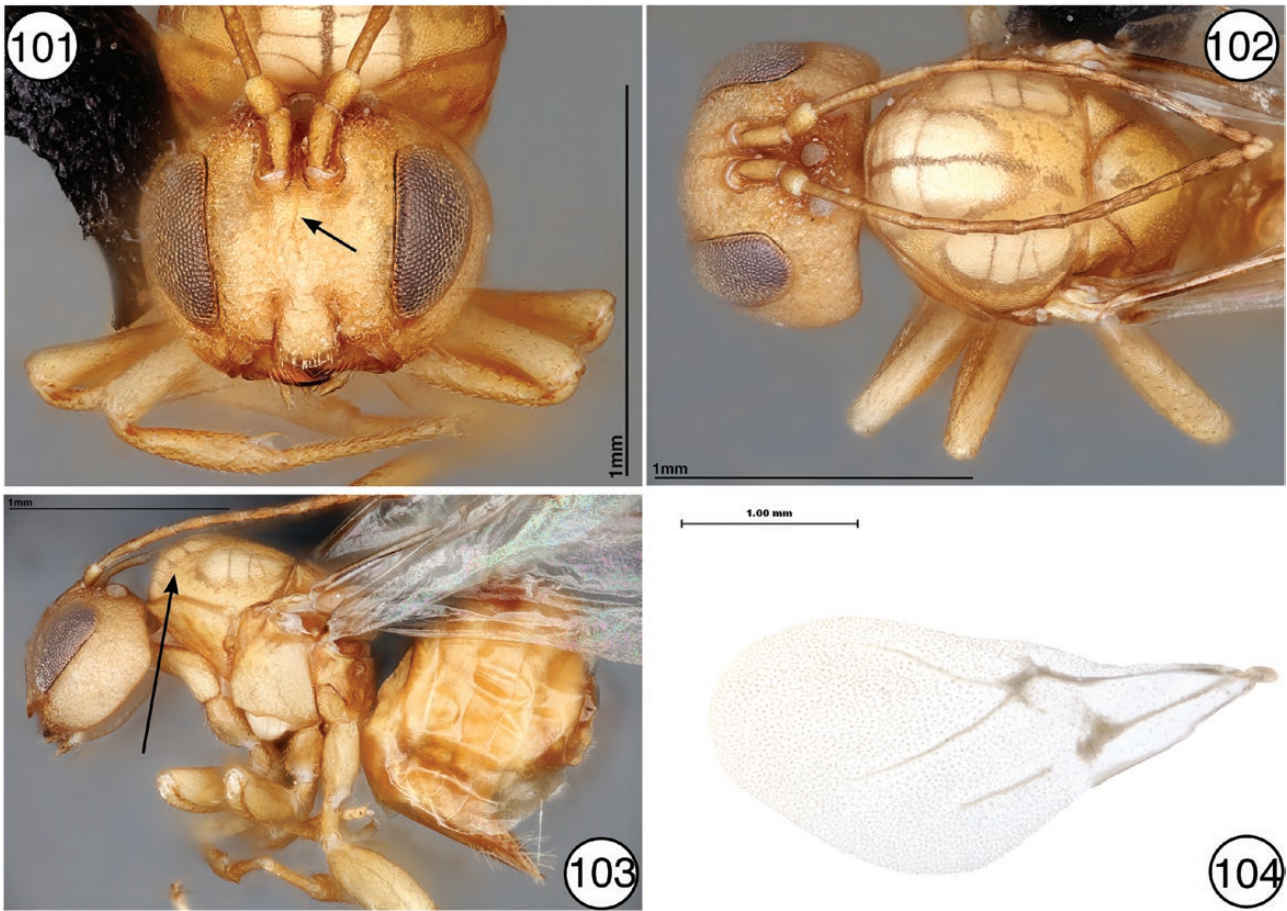

**Figs. 101–104.** Fig. 101, *Eschatocerus acaciae* Mayr, 1881, head, anterior view. USNMENT01231863. Fig. 102, *Eschatocerus acaciae*, dorsal view. USNMENT01231863. Fig. 103, *Eschatocerus acaciae*, lateral view. USNMENT01231863. Fig. 104, *Eschatocerus acaciae*, forewing. USNMENT00655966.

17. Frons between antennal toruli with strong longitudinal carina (arrow, Fig. 101); notauli and scutellar foveae absent (Fig. 102); mesoscutum bulging above pronotum (arrow, Fig. 103); Rs+M and R1 of forewing inconspicuous, marginal cell with Rs separate from anterior wing margin; basal vein absent (Fig. 104); Neotropical gall-inducers on *Acacia* or *Prosopis* ..... Eschatocerini

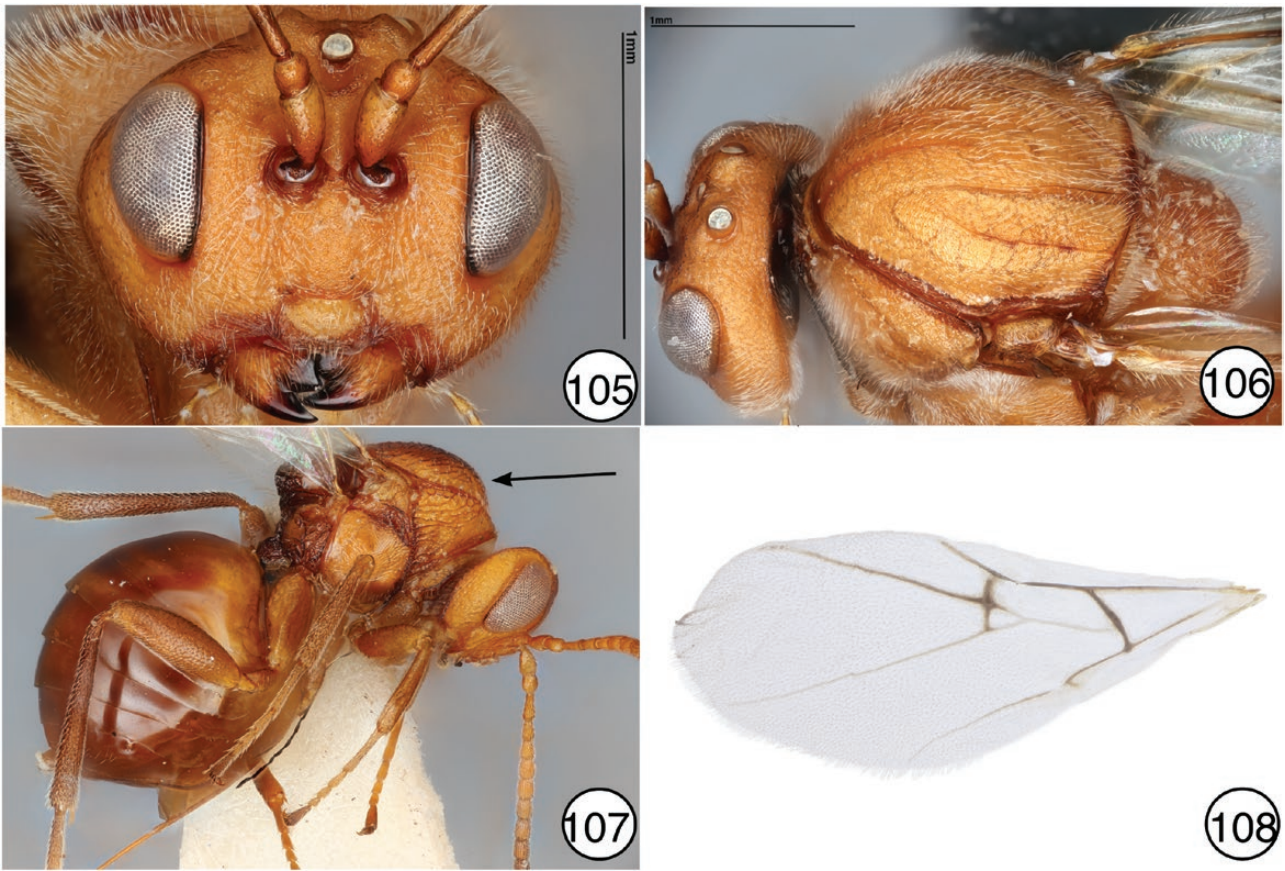

**Figs. 105–108.** Fig. 105, *Andricus quercuscalifornicus*, head, anterior view. USNMENT01231839. Fig. 106, *Andricus quercuscalifornicus*, dorsal view. USNMENT01231839. Fig. 107, *Callirhytis glandium* (Giraud, 1859), lateral view. USNMENT01231862. Fig. 108, *Cerroneuroterus* sp., forewing. USNMENT00655874.

— Frons usually without median carina (Fig. 105); if present, (some *Plagiotrochus*) then it is not so strong and cannot be readily differentiated from Fig. 101. Notauli complete, incomplete or absent (Fig. 106). Scutellar foveae present or confluent, forming shallow transverse depression in lateral view. Mesoscutum not bulging above pronotum (arrow, Fig. 107); Rs+M and R1 of forewing usually present and visible, Rs reaching or almost reaching anterior wing margin. Basal vein present (Fig. 108) in forewing. Gall-inducers on Fagaceae or *Rosa* ..... 18



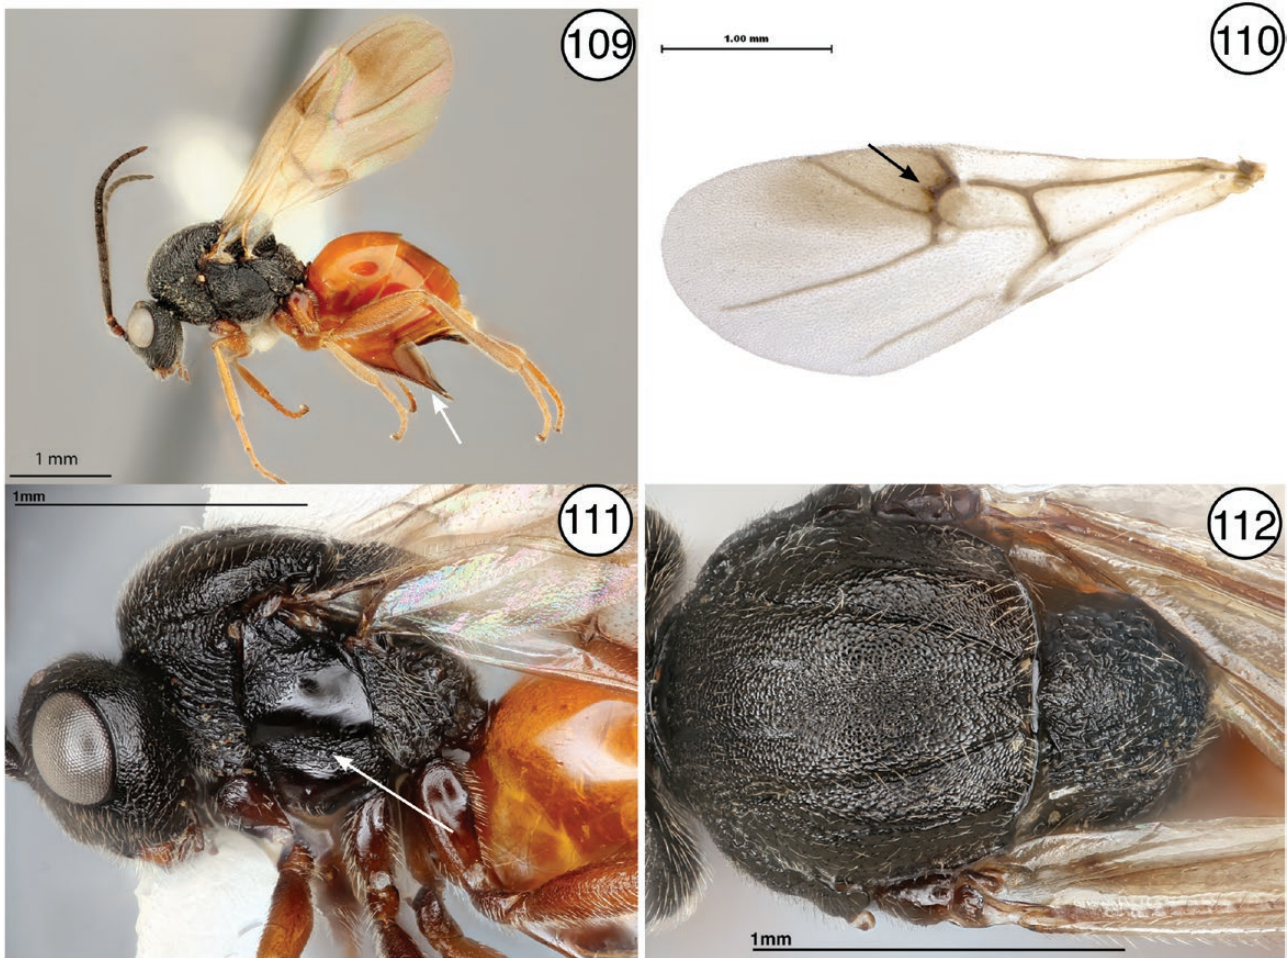

**Figs. 109–112.** Fig. 109, *Diplolepis bicolor*, lateral view. USNMENT01231831. Fig. 110, *Diplolepis rosae*, forewing. USNMENT00655959. Fig. 111, *Diplolepis bicolor*, lateral view. USNMENT01231831. Fig. 112, *Diplolepis bicolor*, dorsal view. USNMENT01231831.

18. Mesopleuron with a broad, crenulate mesopleural impression (arrow, Fig. 111). Usually with a combination of the following character states: hypopygium plough-shaped (arrow, Fig. 109); lateral propodeal carinae indistinct; scutellar foveae faint or absent (Fig. 112); 2r of forewing with a median vein stump projecting distad (arrow, Fig. 110); Holarctic gall-inducers on *Rosa* .....Diplolepidini

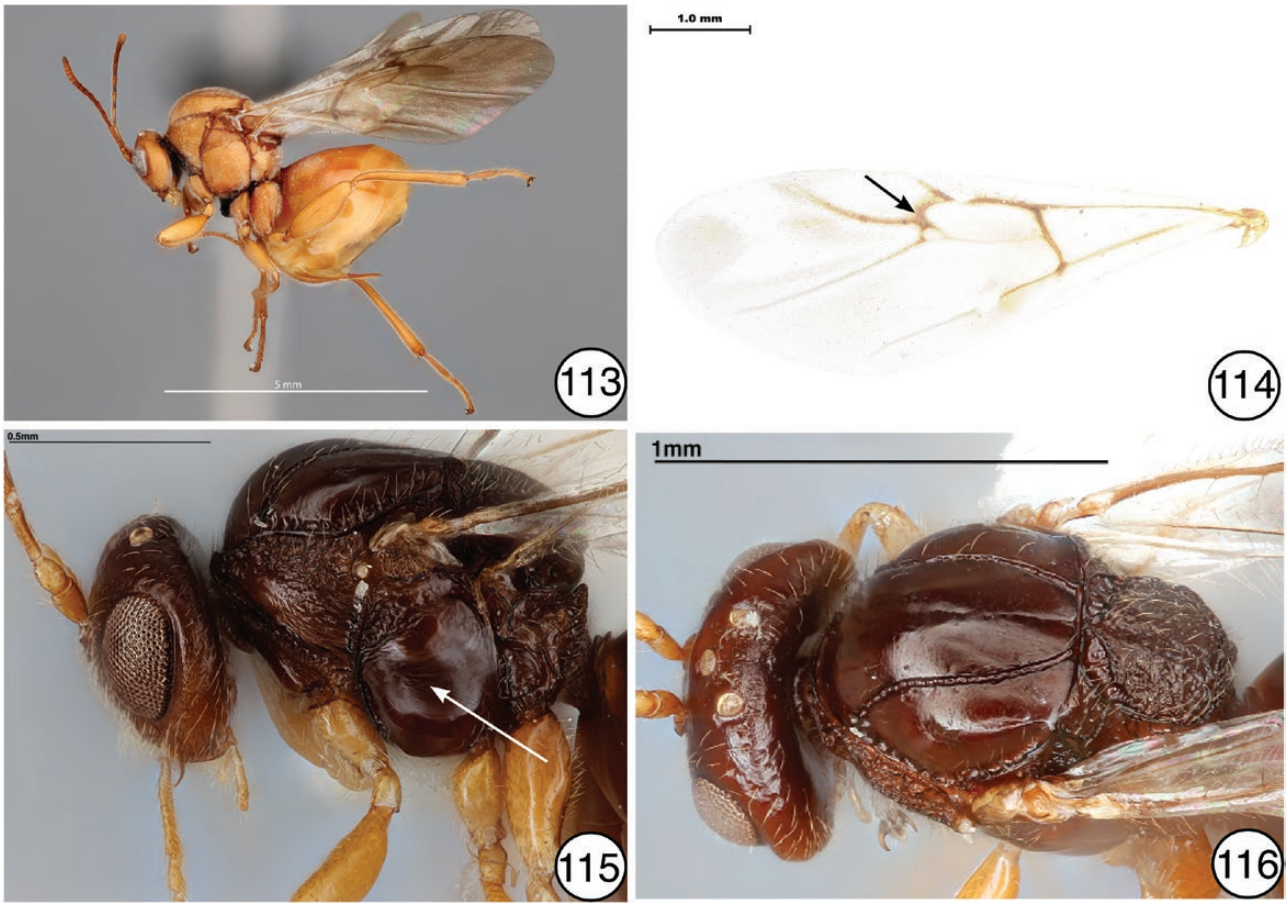

**Figs. 113–116.** Fig. 113, *Andricus quercuscalifornicus*, lateral view. USNMENT01231839. Fig. 114, *Andricus corniger* (Osten-Sacken, 1862), forewing. USNMENT00655954. Fig. 115, *Dryocosmus kuriphilus* Yasumatsu, 1951, lateral view. USNMENT01231861. Fig. 116, *Dryocosmus kuriphilus*, lateral view. USNMENT01231861.

— Mesopleuron usually without a mesopleural impression (Fig. 113; arrow, Fig. 115). Without other characters combined (Figs. 113–116). Holarctic and Oriental gall-inducers on Fagaceae, mainly *Quercus* .....Cynipini

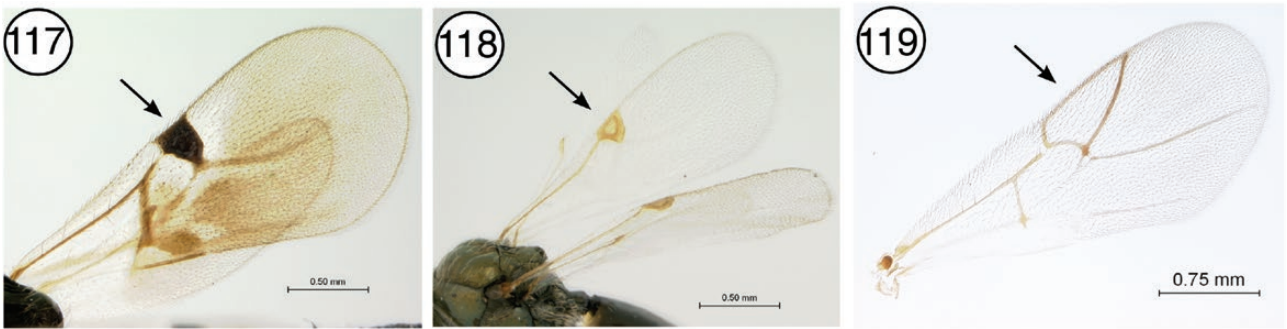

**Figs. 117–119.** Fig. 117, Forewing, *Tylosema dayae*, SAM-HYM-P0024394. Fig. 118, *Pycnostigmus mastersonae* Buffington and van Noort, 2007, forewing. SAM-HYM-P0024397. Fig. 119, *Melanips* sp., forewing. USNMENT00655980.

19. Marginal cell sclerotized into a pseudostigma (arrows, Figs. 117 and 118). Afrotropical and southeastern Palearctic/Middle East .....Pycnostigminae  
 — Marginal cell not sclerotized (arrow, Fig. 119) ..... 20



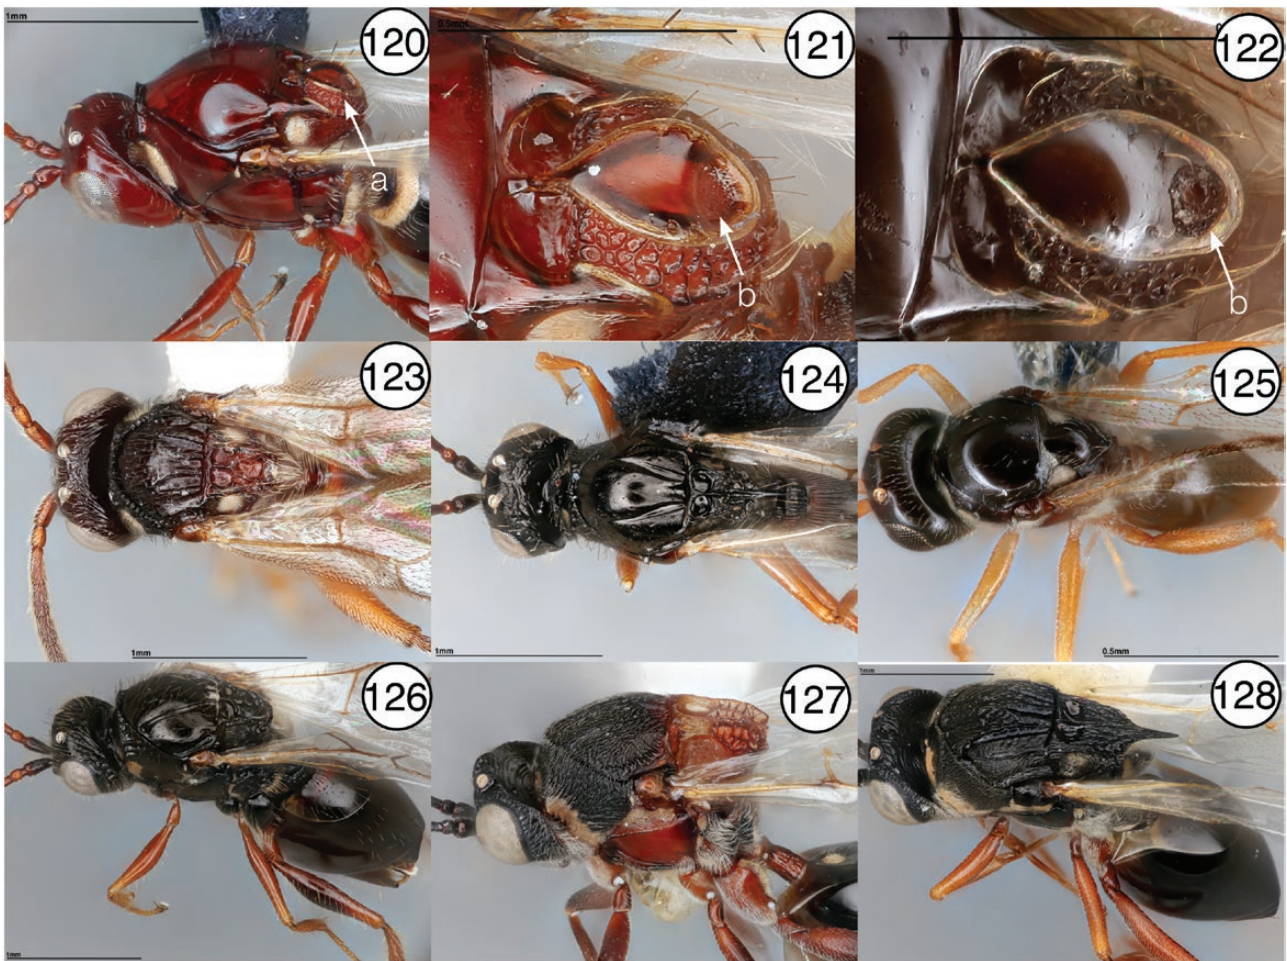

**Figs. 120–128.** Fig. 120, *Striatovertex* sp., dorso-lateral view. USNMENT01231830. Fig. 121, *Afrostilba* sp., dorso-lateral view. USNMENT01022103. Fig. 122, *Trybliographa melanoptera*, dorsal view. USNMENT01231838. Fig. 123, *Scutimica* sp., dorsal view. USNMENT01231860. Fig. 124, *Neralsia* sp., dorsal view. USNMENT01231869. Fig. 125, *Alloxysta* sp., dorsal view. USNMENT01231868. Fig. 126, *Figites* sp., dorso-lateral view. USNMENT01231842. Fig. 127, *Callaspidia* sp., lateral view. USNMENT01231867. Fig. 128, *Aspicerca hartigi* Dalla Torre, 1843, dorso-lateral view. USNMENT01231866.

20. Scutellum with an elevated scutellar plate (a, Fig. 120); with a glandular release pit (b, Figs. 121 and 122) ..... Eucoilinae  
 — Structure of scutellum variable, posterior surface relatively flat or evenly convex, never with a distinct elevated plate and associated posterior release pit (Figs. 123–128) ..... 21

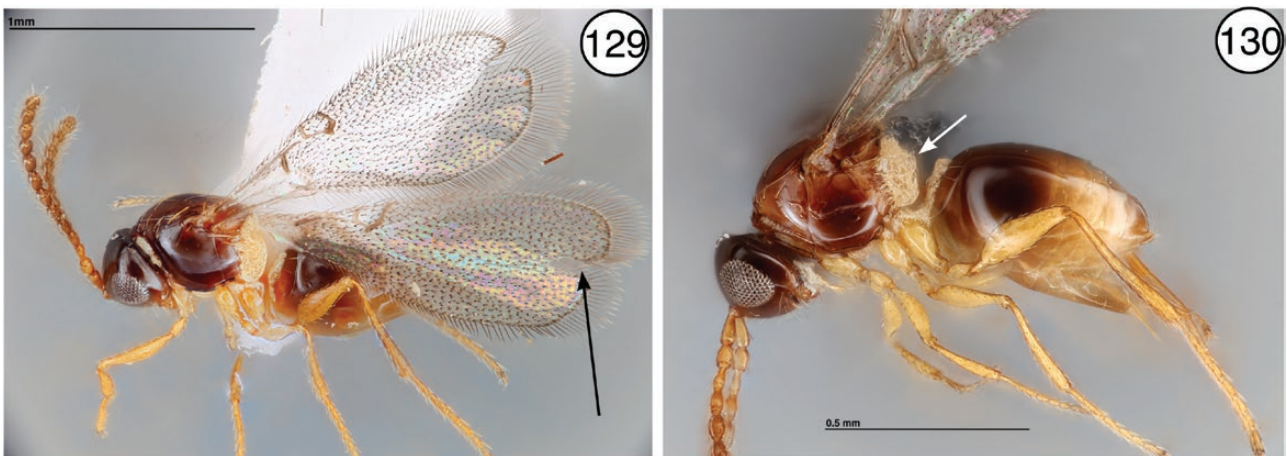

**Figs. 129 and 130.** Fig. 129, *Thoreauella* sp., lateral view. USNMENT01525887. Fig. 130, *Thoreauella* sp., lateral view. USNMENT01022106.

21. Apex of forewing deeply bilobed (arrow, Fig. 129). Often raised median area on scutellum. Densely packed (foamy) setae present on propodeum (arrow, Fig. 130). Typically 1.5 mm in length ..... Emargininae



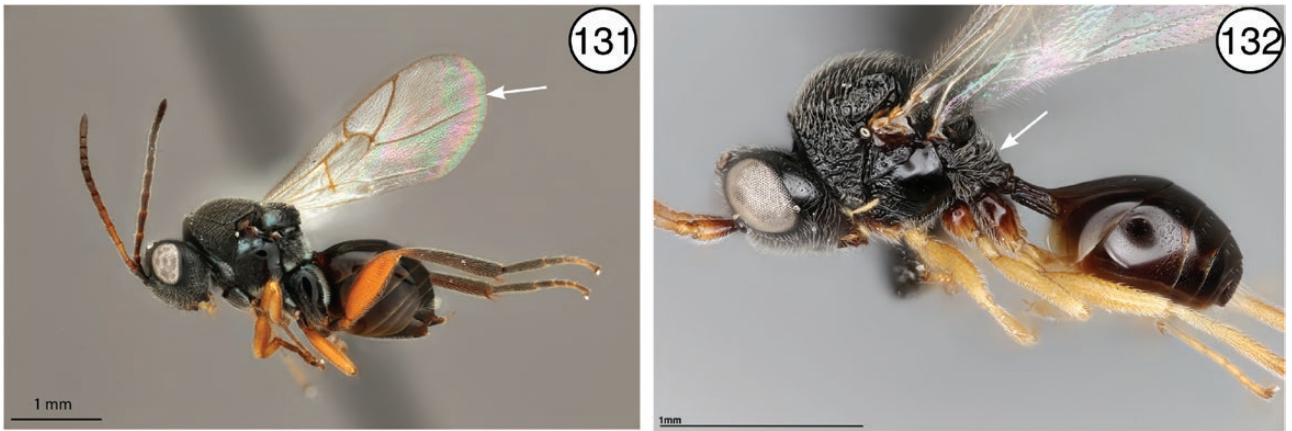

**Figs. 131 and 132.** Fig. 131, *Euceroptres maritimus*, lateral view. USNMENT01231848. Fig. 132, *Xyalaspis flavipes*, lateral view. USNMENT01231844.  
 — Apex of forewing rounded (arrow, Fig. 131). Propodeum variously setose to glabrous, never with densely packed setae (Fig. 132) ..... 22

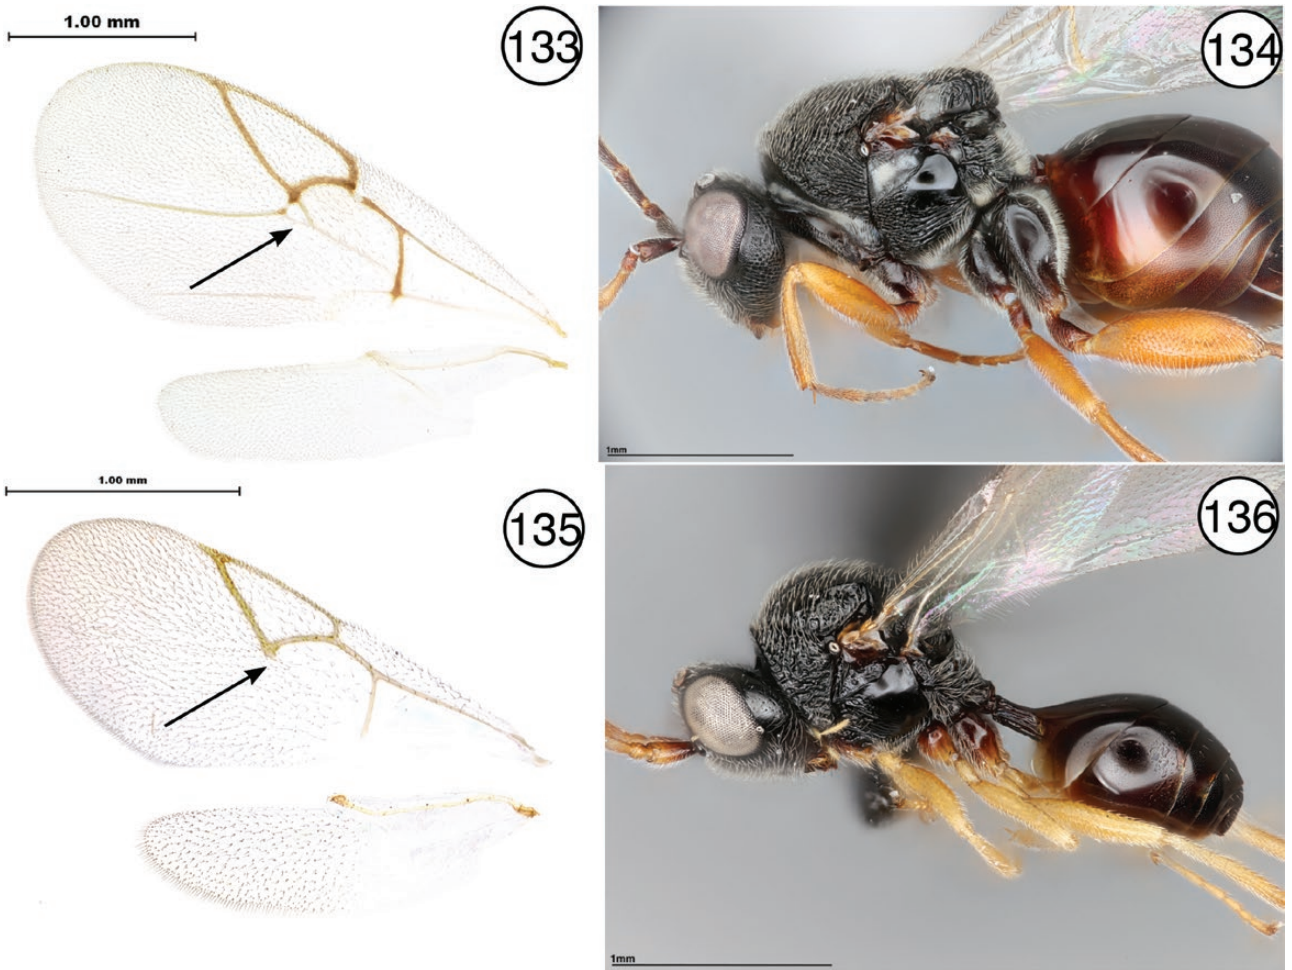

**Figs. 133–136.** Fig. 133, *Euceroptres maritimus*, forewing. USNMENT00655937. Fig. 134, *Euceroptres maritimus*, lateral view. USNMENT01231848. Fig. 135, *Xyalaspis* sp., forewing. USNMENT00655972. Fig. 136, *Xyalaspis flavipes*, lateral view. USNMENT01231844.  
 22. Areolet present (arrow, Fig. 133); base of metasoma setose or glabrous (Fig. 134) ..... 23  
 — Areolet absent (arrow, Fig. 135); base of metasoma glabrous (Fig. 136) ..... 25



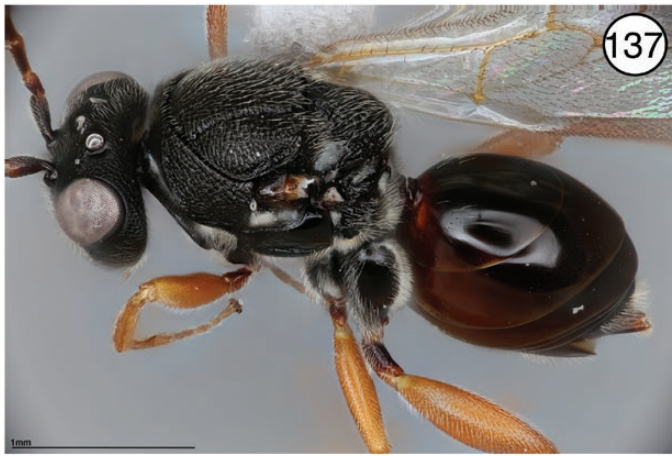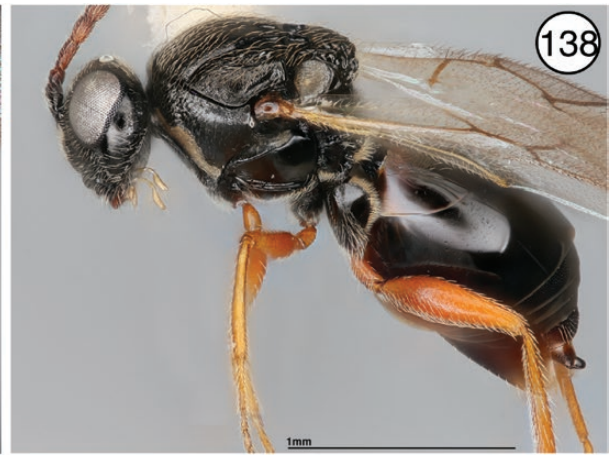

**Figs. 137 and 138.** Fig. 137, *Euceroptres maritimus*, dorso-lateral view. USNMENT01231848. Fig. 138, *Figites* sp., lateral view. USNMENT01231842.

- 23. Head and mesoscutum generally coriaceous to foveate, and frequently setose (Fig. 137) ..... 24
- Head and mesoscutum generally smooth, lacking dense setal patterns, but some stout setae present (Fig. 138) ..... some Figitinae

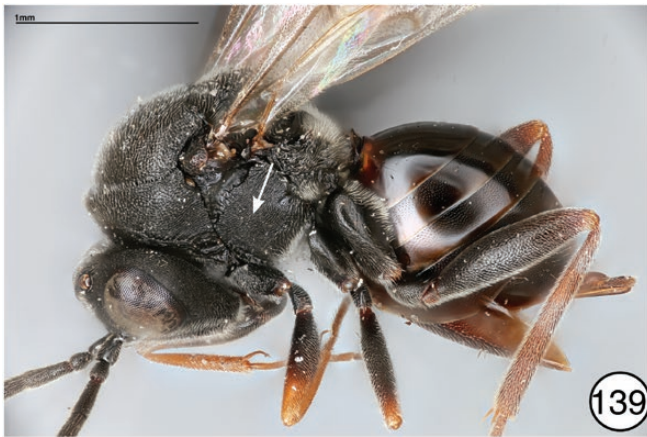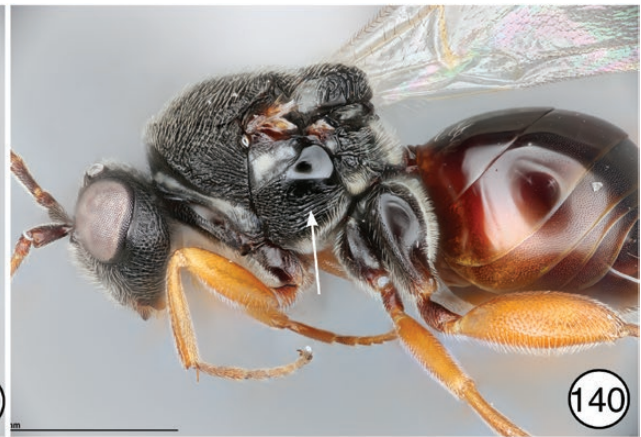

**Figs. 139 and 140.** Fig. 139, *Parnips nigripes* (Barbotin 1964), lateral view. USNMENT01231874. Fig. 140, *Euceroptres maritimus*, lateral view. USNMENT01231848.

- 24. Mesopleuron striate, with no indication of distinct mesopleural furrow (arrow, Fig. 139). Lateral pronotal carina absent. Mediterranean, on *Papaver* ..... Parnipinae
- Mesopleuron dorsally smooth, ventrally striate along the distinct mesopleural furrow (arrow, Fig. 140). Lateral pronotal carina present. Nearctic, on *Quercus* ..... Euceroptrinae

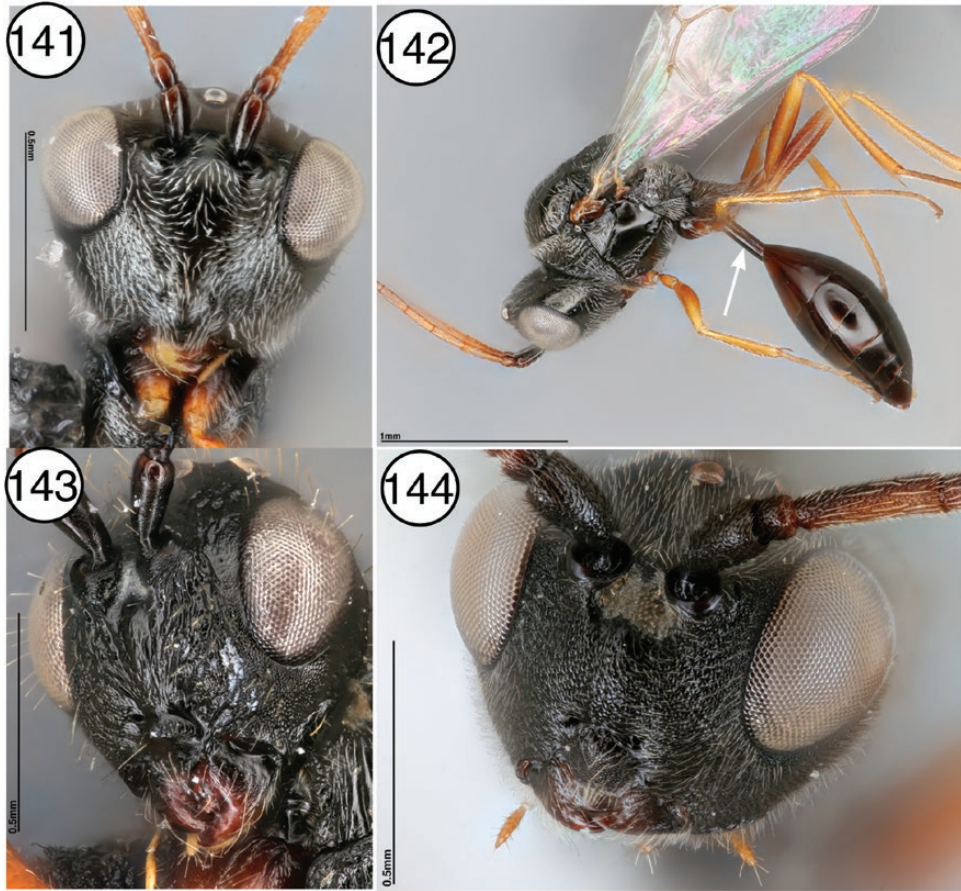

**Figs. 141–144.** Fig. 141, *Anacharis melanoneura* Ashmead, 1887, head, anterior view. USNMENT01231833. Fig. 142, *Anacharis melanoneura*, lateral view. USNMENT01231833. Fig. 143, *Callaspidia* sp., head, anterior view. USNMENT01231867. Fig. 144, *Neralsia* sp., head, anterior view. USNMENT01231869.

25. Head generally triangular in anterior view; mouth small, with broadly overlapping mandibles (Fig. 141). Petiole often long (arrow, Fig. 142). First metasomal tergum subequal in length to second, sometimes longer ..... Anacharitinae  
 — Head oval to round in anterior view (Figs. 143 and 144); mouth region broadened, mandibles larger and not extensively overlapping. Petiole typically not elongate ..... 26



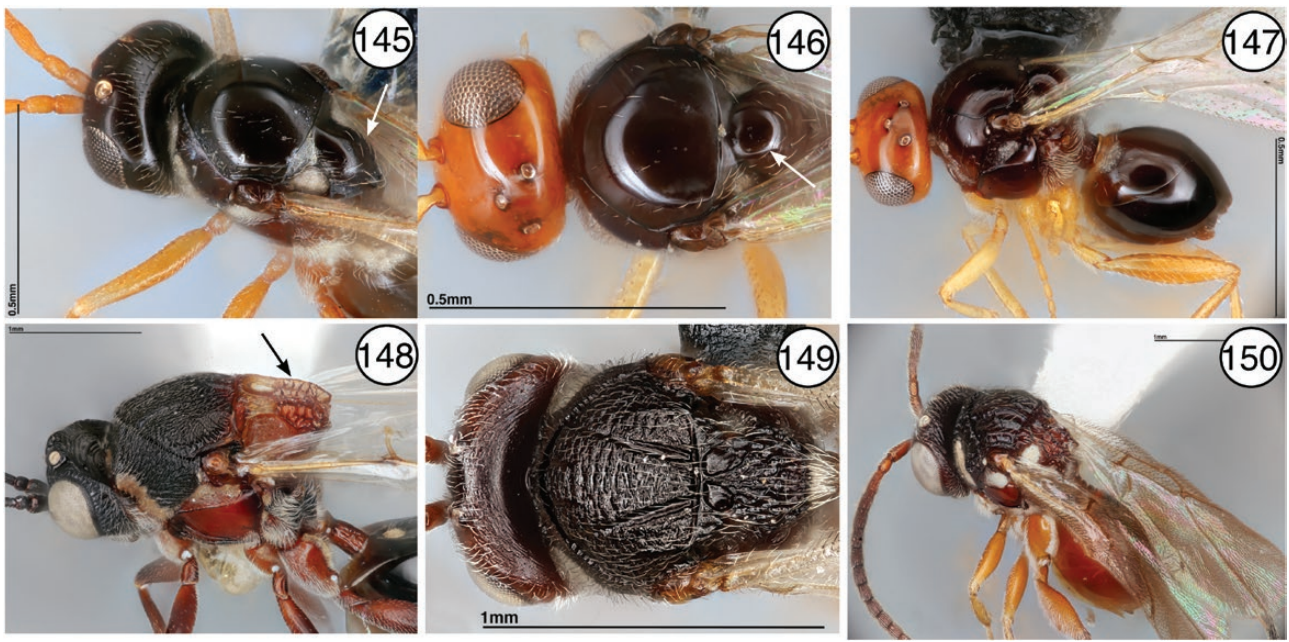

**Figs. 145–150.** Fig. 145, *Apocharips trapezoidea* (Hartig, 1841), dorso-lateral view. USNMENT01231873. Fig. 146, *Alloxysta* sp. dorsal view. USNMENT01231840. Fig. 147, *Alloxysta* sp. lateral view. USNMENT01231840. Fig. 148, *Callaspidia* sp., lateral view. USNMENT01231867. Fig. 149, *Myrtopsen mimosae* Weld, 1926, dorsal view. USNMENT01525867. Fig. 150, *Scutimica* sp., dorso-lateral view. USNMENT01231860.

26. Scutellum evenly convex, rounded, smooth (arrows, Figs. 145 and 146). Usually tiny, very often pale in color (Fig. 147). Mesoscutum usually shiny and smooth (Figs. 145–147), rarely matte ..... Charipinae  
 — Scutellum flat or weakly convex, and sculptured (Figs. 148–150). Usually darker, typically black. Mesoscutum usually with transverse ridges or distinct microsculpture (Figs. 148–150) ..... 27

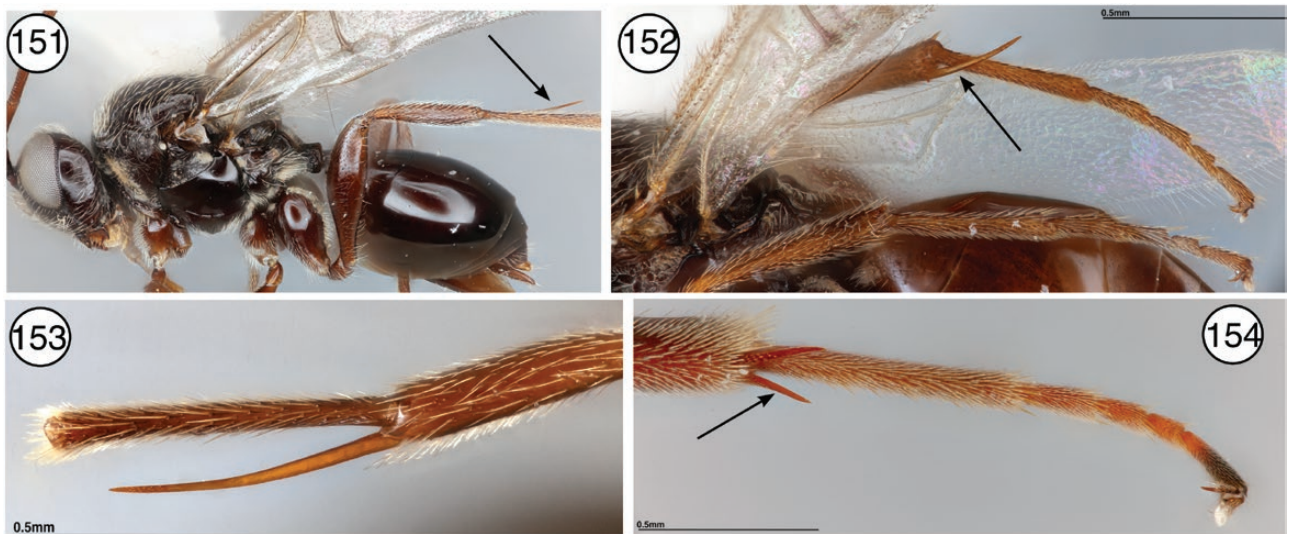

**Figs. 151–154.** Fig. 151, *Plectocynips lago* Buffington and Nieves-Aldrey, 2011, lateral view. USNMENT01231872. Fig. 152, *Araucocynips* sp., hind leg. USNMENT01231865. Fig. 153, *Plectocynips lago*, hind leg. USNMENT01231872. Fig. 154, *Callaspidia* sp., hind leg. USNMENT01231867.

27. Metatibial spur remarkably long, more than half the length of basal tarsomere (arrows, Figs. 151–153). Neotropical; associated with *Nothofagus* forests. Rarely encountered ..... Plectocynipinae  
 — Metatibial spur not remarkably long, at most a quarter of length of first tarsomere (arrow, Fig. 154) ..... 28

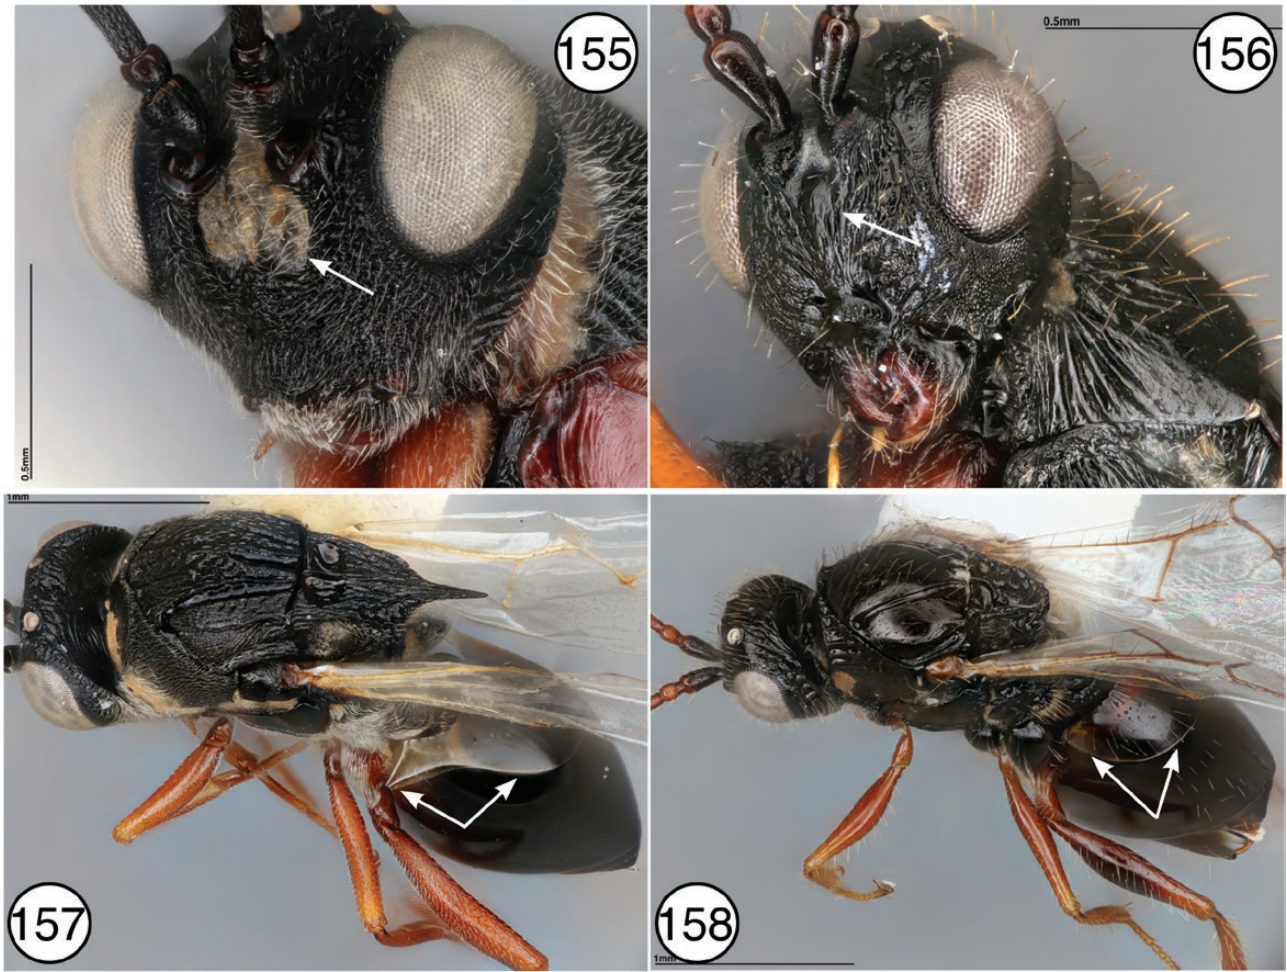

**Figs. 155–158.** Fig. 155, *Callaspidia* sp., head, anterior view. USNMENT01231867. Fig. 156, *Neralsia* sp., head, anterior view. USNMENT01231869. Fig. 157, *Aspicera hartigi*, dorso-lateral view. USNMENT01231866. Fig. 158, *Figites* sp., dorso-lateral view. USNMENT01231842.

28. Facial impression present (arrow, Fig. 155). First metasomal tergum saddle-like with concave posterolateral margin and more or less linguiform median part (arrows, Fig. 157). Often relatively large, with a well sculptured body, often red color, and wings with strongly reduced pubescence and accessory veins .....core *Aspicerinae*  
 — Facial impression absent (arrow, Fig. 156). First metasomal tergum rounded, usually with a convex margin (arrows, Fig. 158). Size varying from relatively large to very small ..... 29



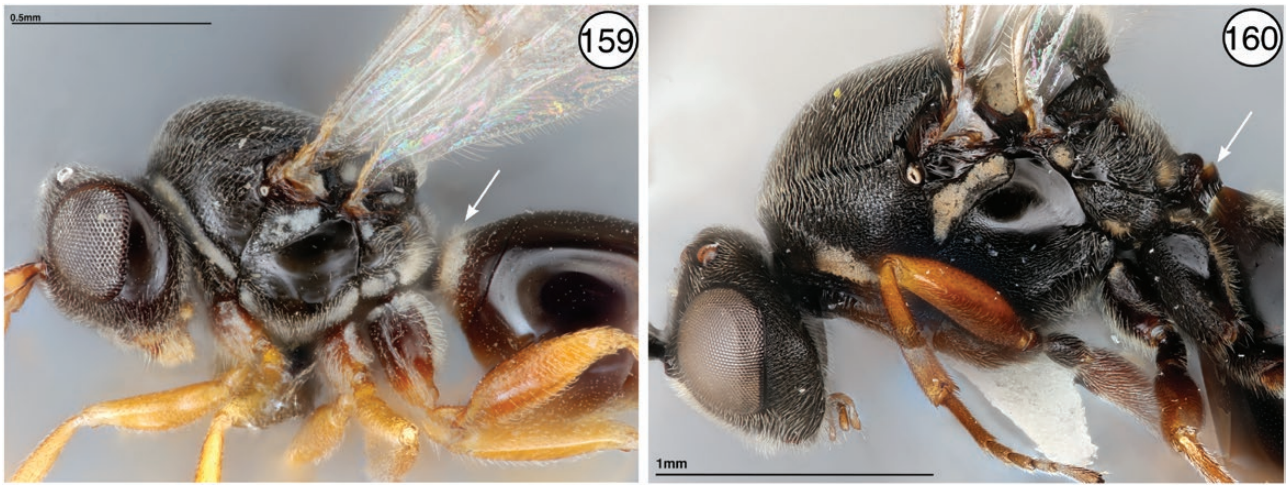

**Figs. 159 and 160.** Fig. 159, *Mikeius hartigi* (Girault, 1929), lateral view. USNMENT01231871. Fig. 160, *Melanips* sp., mesosoma, lateral view. USNMENT01231847. 29. Short petiole, no flange or collar (arrow, Fig. 159). Inquilines, mostly in Australia and Neotropical region, very rare in Nearctic and East Palearctic regions. Rarely encountered ..... 30  
 — Longer petiolar region, with a reduced basal metasomal tergum forming a collar or sheath over petiole (arrow, Fig. 160) ..... 31

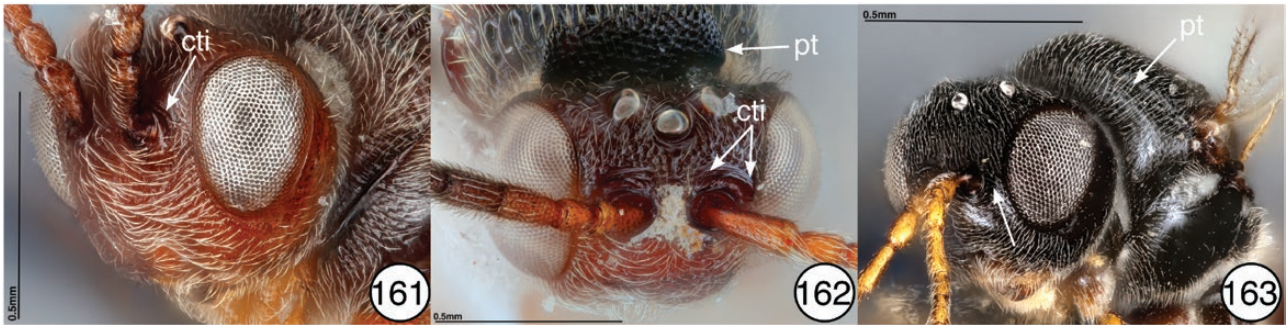

**Figs. 161–163.** Fig. 161, *Myrtopsen mimosae*, head, anterior view. USNMENT01525867. Fig. 162, *Scutimica* sp., head, dorsal view. USNMENT01231860. Fig. 163, *Mikeius hartigi*, head, anterior view. USNMENT01231871. 30. With a circumtorular impression (an impression above antennal insertion) (cti, Figs. 161 and 162). Often with a well-developed pronotal plate (pt, Fig. 162) ..... Thrasorinae  
 — Without a circumtorular impression (arrow, Fig. 163). Without a well-developed pronotal plate, just visible laterally (pt, Fig. 163). Australia only ..... Mikeiinae



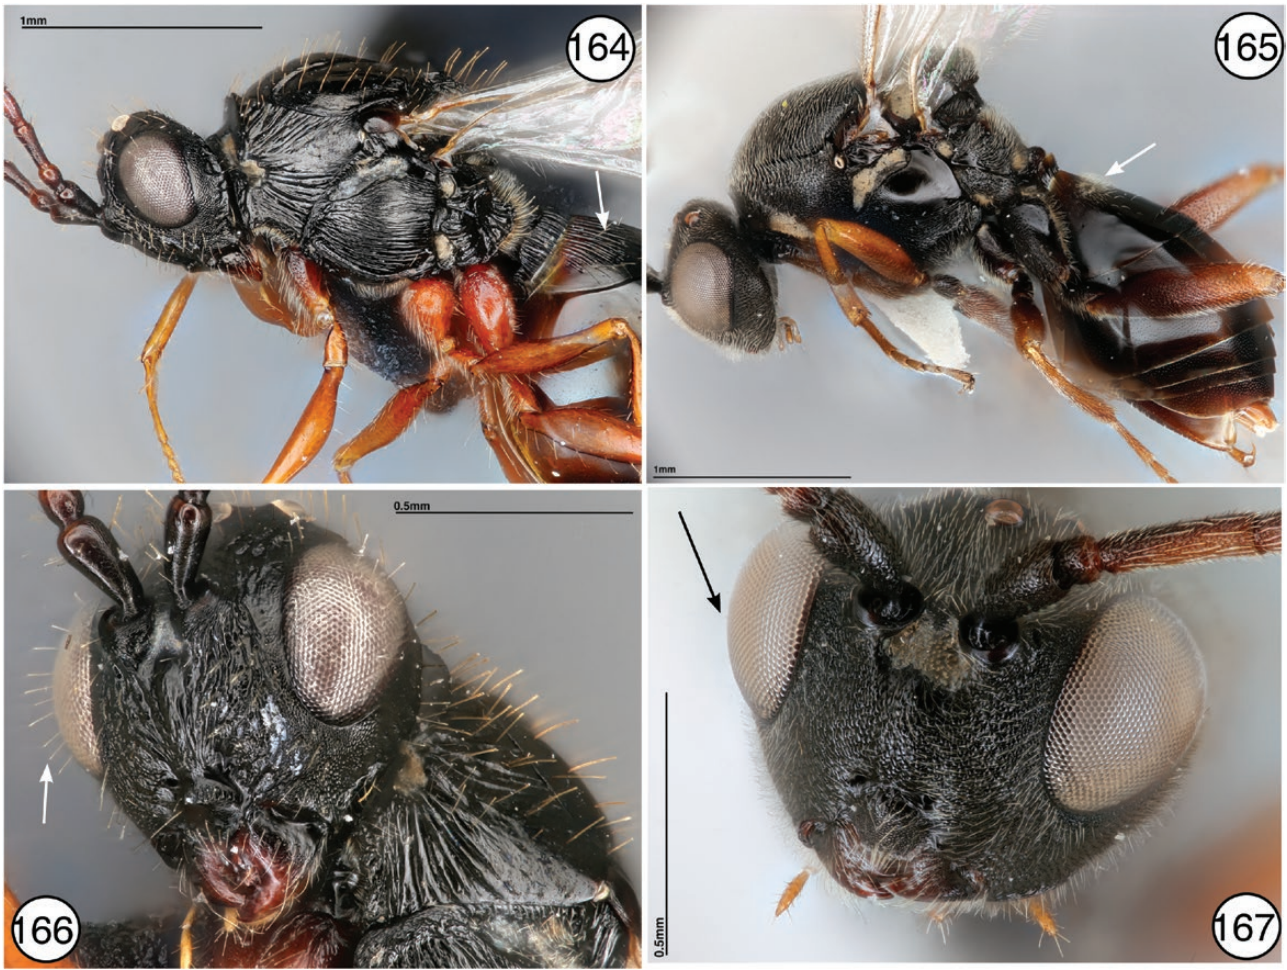

**Figs. 164–167.** Fig. 164, *Neralsia* sp., lateral view. USNMENT01231869. Fig. 165, *Melanips* sp., mesosoma, lateral view. USNMENT01231847. Fig. 166, *Neralsia* sp., head, anterior view. USNMENT01231869. Fig. 167, *Melanips* sp., head, anterior view. USNMENT01231847.

31. Without a metasomal hairpatch (arrow, Fig. 164). Eyes commonly setose (arrow, Fig. 166) ..... core Figitinae  
 — With a metasomal hair patch (arrow, Fig. 165). Eyes typically glabrous (arrow, Fig. 167) ..... 32

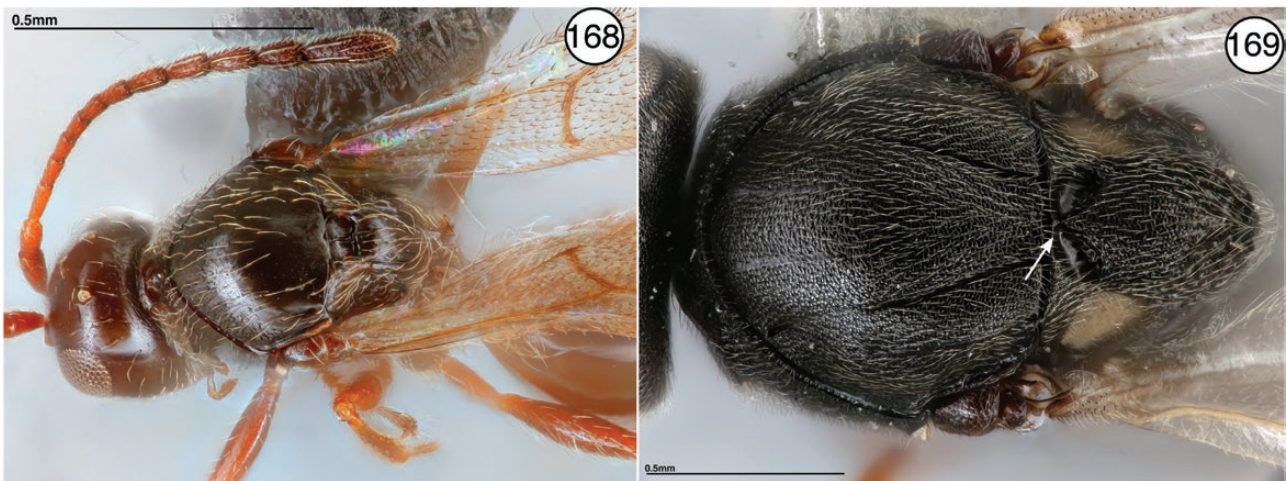

**Figs. 168 and 169.** Fig. 168, *Lonchidia* sp., dorsal view. USNMENT01525866. Fig. 169, *Melanips* sp., mesosoma, dorsal view. USNMENT01231847.

32. Mesoscutum typically shining, lacking microsculpture (Fig. 168), frequently with long setae present ..... several Figitinae  
 — Mesoscutum matte and leathery with dense microsculpture (Fig. 169) ..... *Melanips* (Aspicerinae)



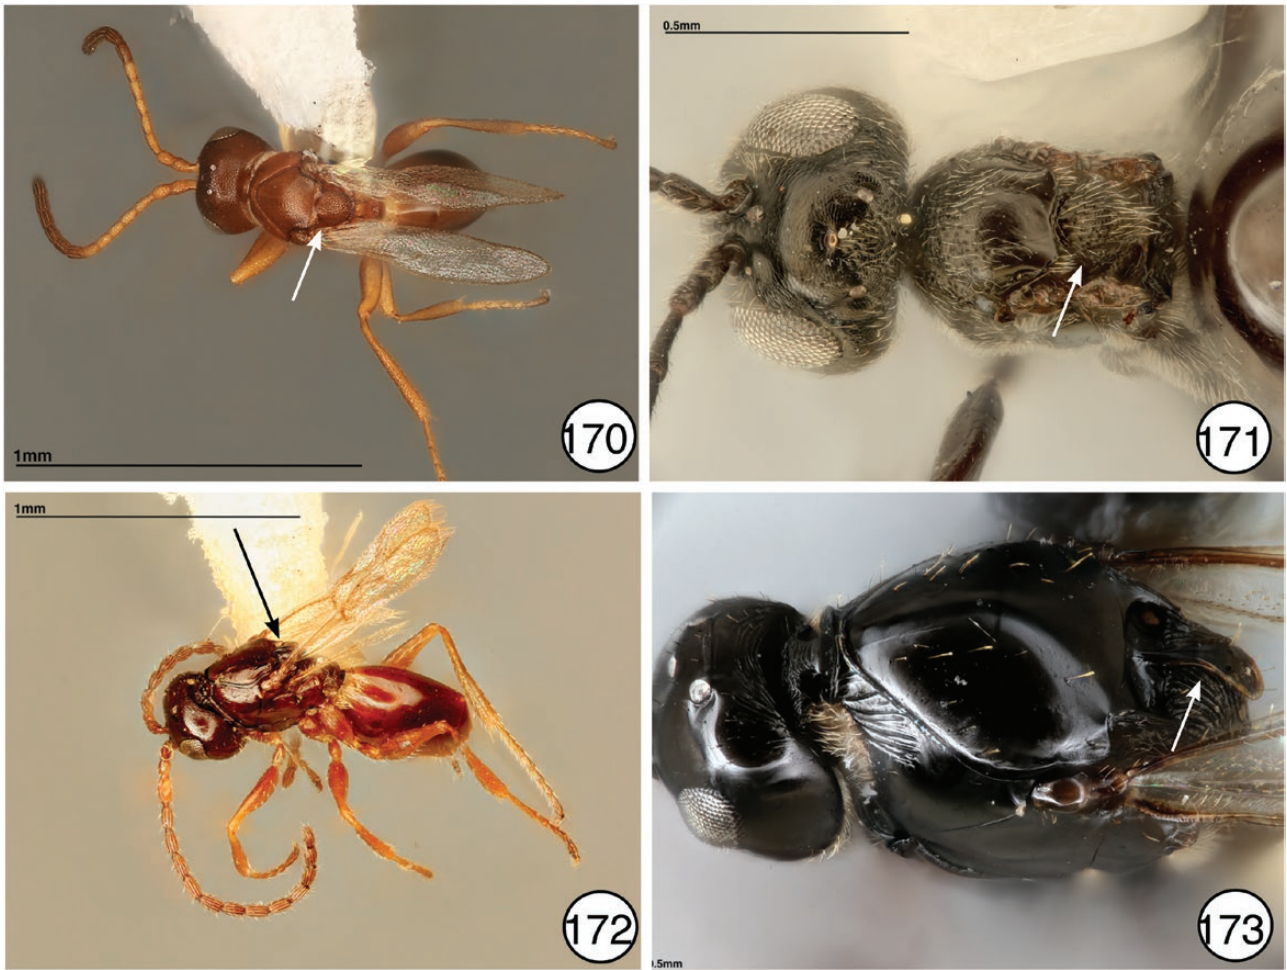

**Figs. 170–173.** Fig. 170, *Lytoxysta brevipalpis*, dorsal view. USNMENT01231836. Fig. 171, *Phylloteras* sp., dorsal view. USNMENT01231835. Fig. 172, *Kleidotoma* sp., dorso-lateral view. USNMENT01231837. Fig. 173, *Kleidotoma* sp., head and mesosoma, dorso-lateral view. USNMENT01525865.

- 33. Scutellum simple, without a distinct scutellar plate (arrows, [Figs. 170 and 171](#)) ..... 34
- Scutellum surmounted by distinct scutellar plate (arrows, [Figs. 172 and 173](#)) ..... Eucoilinae

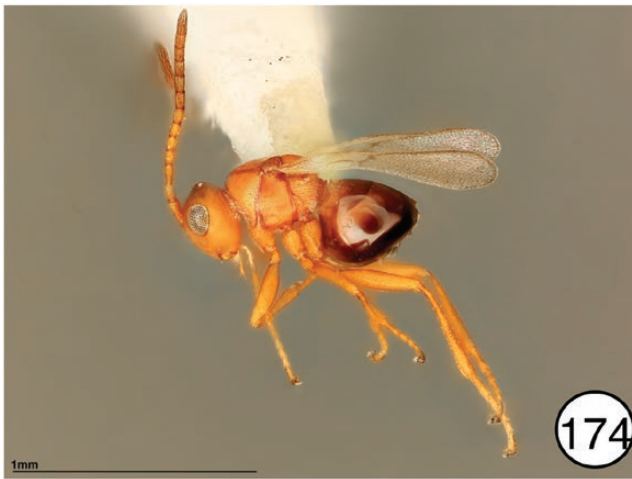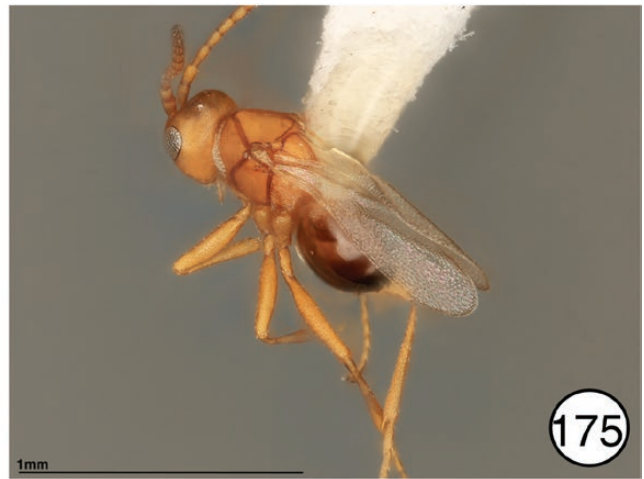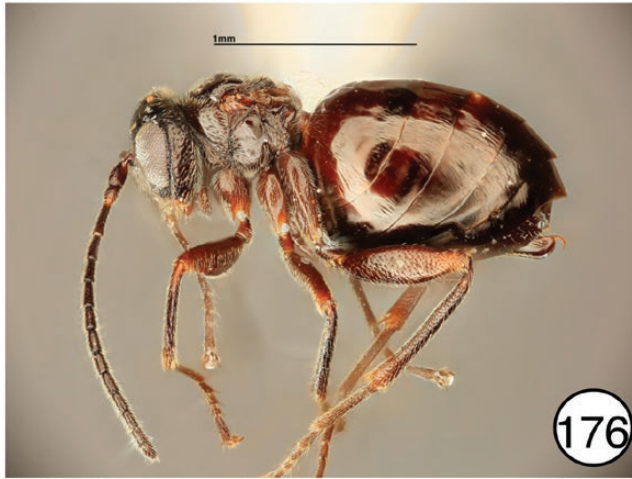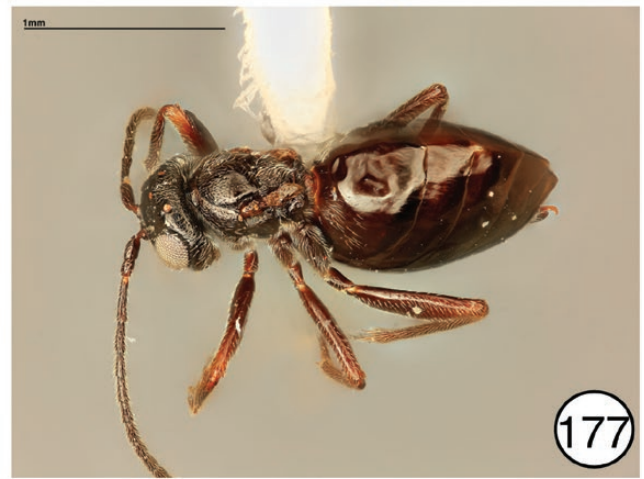

**Figs. 174–177.** Fig. 174, *Lytoxysta brevipalpis*, lateral view. USNMENT01231836. Fig. 175, *Lytoxysta brevipalpis*, dorso-lateral view. USNMENT01231836. Fig. 176, *Phylloteras* sp., lateral view. USNMENT01231835. Fig. 177, *Phylloteras* sp., dorsal view. USNMENT01231835.

34. Metasoma about the size of the mesosoma (Figs. 174 and 175); brachyptery (Figs. 174 and 175) more common than aptery. Color variable but very often pale. Mesosoma usually not strikingly narrow. Scutellum evenly convex. Mainly in summer in the Holarctic Region ..... Charipinae  
 — Metasoma at least twice the size of mesosoma (Figs. 176 and 177), both segments the same size; apterous (Figs. 176 and 177) to brachypterous. Color from pale to dark brown. Mesosoma usually strikingly narrow. Scutellum rather flat. Mainly in the winter half of the year in the Holarctic Region..... Cynipini (alternate generation of winged forms)



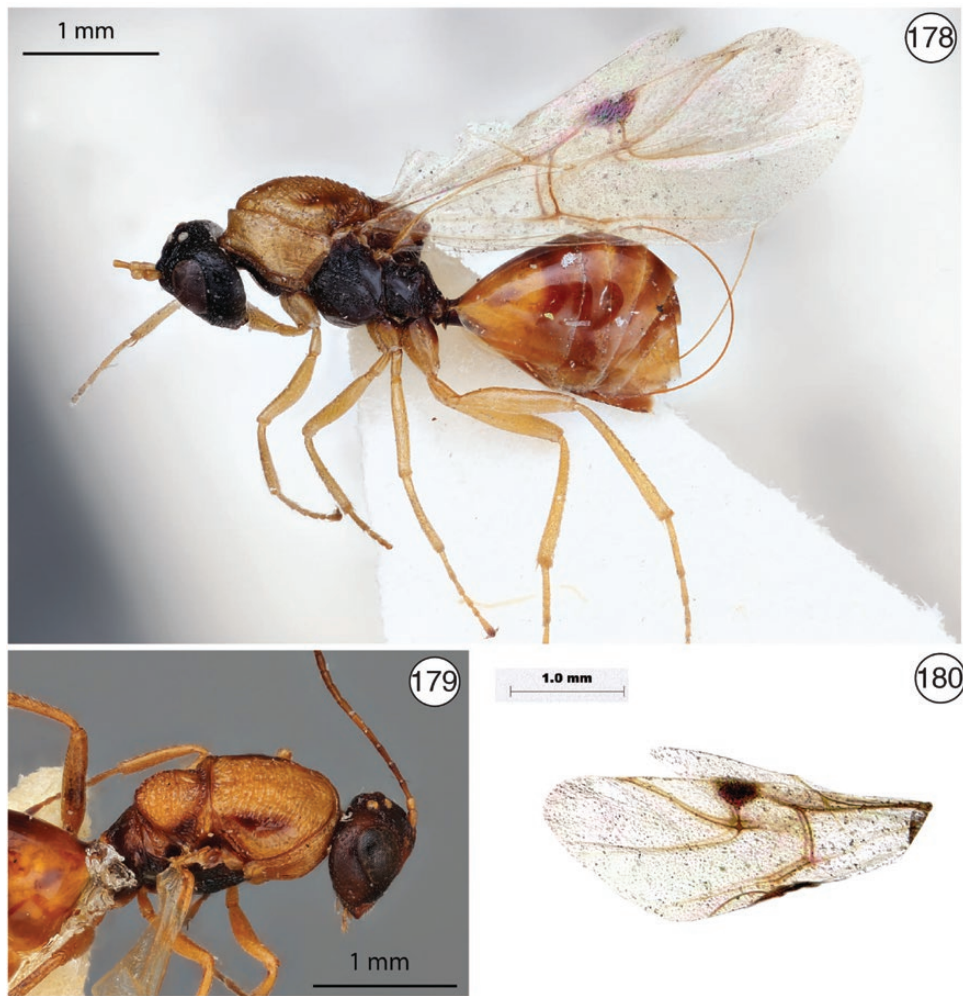

Plate 1. Figs. 178–180. Austrocynipidae. *Austrocynipis mirabilis*. Holotype, ANIC.

## Systematic Overview

### Austrocynipidae

Figs. 178–180

This monotypic family is one of the rarest within the Hymenoptera. *Austrocynipis mirabilis* Riek, 1971 was reared from cones of hoop pine (*Araucaria cunninghami* Aiton ex D. Don) in Australia that were infested with oecophorid moths. Previously, cones from these trees were collected for propagation and timber production; this is now achieved through other means, and cones are not regularly collected. As these cones are difficult to access, *Austrocynipis* has not been collected again since the original description. Riek (1971) reports that other species of *Araucaria* were also surveyed but yielded no *Austrocynipis*.

Biology. Host Unknown. Collected from *Araucaria* cones infested with oecophorid moths (Ronquist 1999).

Distribution. Australia: Queensland.

Relevant literature. Riek, 1971; description. Paretas-Martinez et al., 2013; overview.

Classification.

Austrocynipidae Riek, 1971

*Austrocynipis* Riek, 1971; 1 species in Australia.

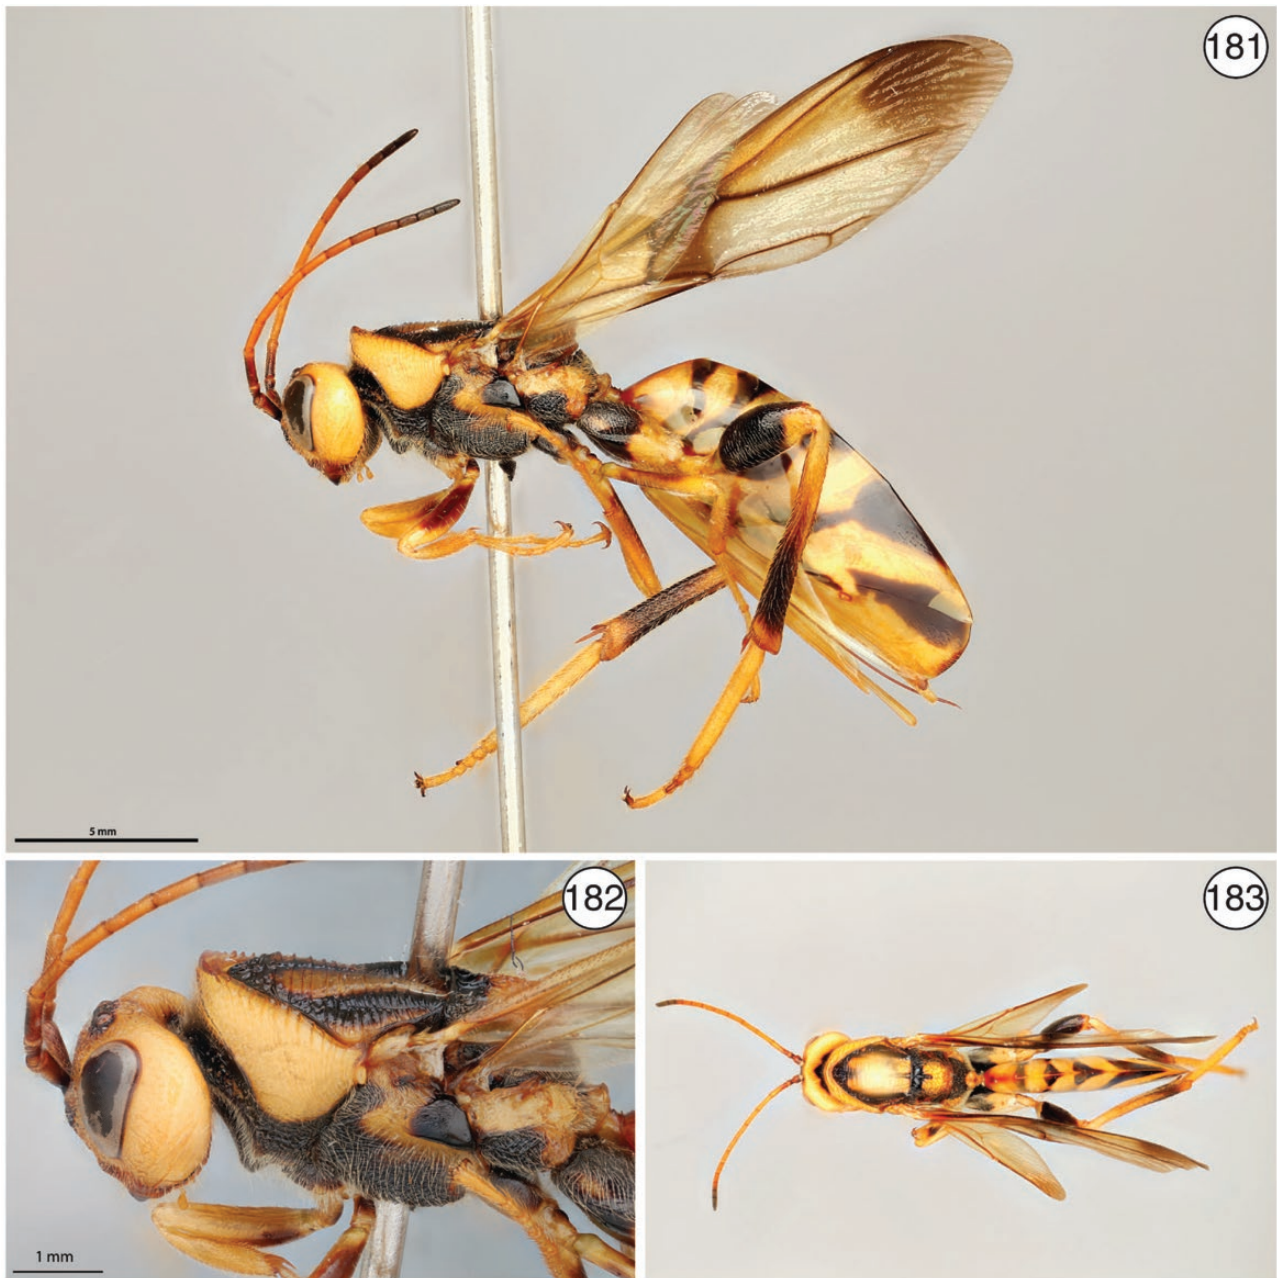

Plate 2. Figs. 181–183. Ibalidae. *Ibalia anceps*. USNMENT01231826.

## Ibaliidae

### Figs. 181–183

Ibaliids are generally a holarctic group with the highest species richness in North America (Liu and Nordlander 1992). These are very distinct cynipoids, often brightly colored, and several times larger in body size than any other cynipoids (some liopterids are also large). Ronquist (1995a,b) hypothesized that this group, along with liopterids and *Austrocynips*, composing the ‘macro cynipoids’, represent the most pleisiomorphic forms of cynipoids, and further suggesting that the ground-plan biology for cynipoids is parasitizing wood boring insect larvae. This argument is supported by the fact that all members of macro cynipoid families possess horizontally strigate mesoscuta, putatively an adaptation to chewing out of woody substrates where their hosts dwell. Indeed, ibaliids are known to be koinobiont endoparasitoids of siricid woodwasps (Hymenoptera: Siricidae)

(Hurley et al. 2020). Species of *Ibalia* are typically not very rare in the eastern Nearctic Region and parts of the Palearctic Region; species in the desert southwest of the United States are more rarely encountered. Species of *Heteribalia* are not common in the wild, but one species is regularly intercepted from wood products entering the United States from China (Buffington, personal observation). *Eileenella* has not been collected since its description. *Eileenella* has been placed in its own monotypic subfamily Eileneellinae Kovalev, 1994, which appears not to have been formally synonymized in the literature, even though its usefulness is obviously limited and has not been commonly cited.

Biology. Koinobiont endoparasitoids of Siricidae (Hymenoptera).

Distribution. Holarctic and Oriental, one genus extends into Papua New Guinea; Introduced to Australia, New Zealand, and South Africa for biological control (Hurley et al. 2020).



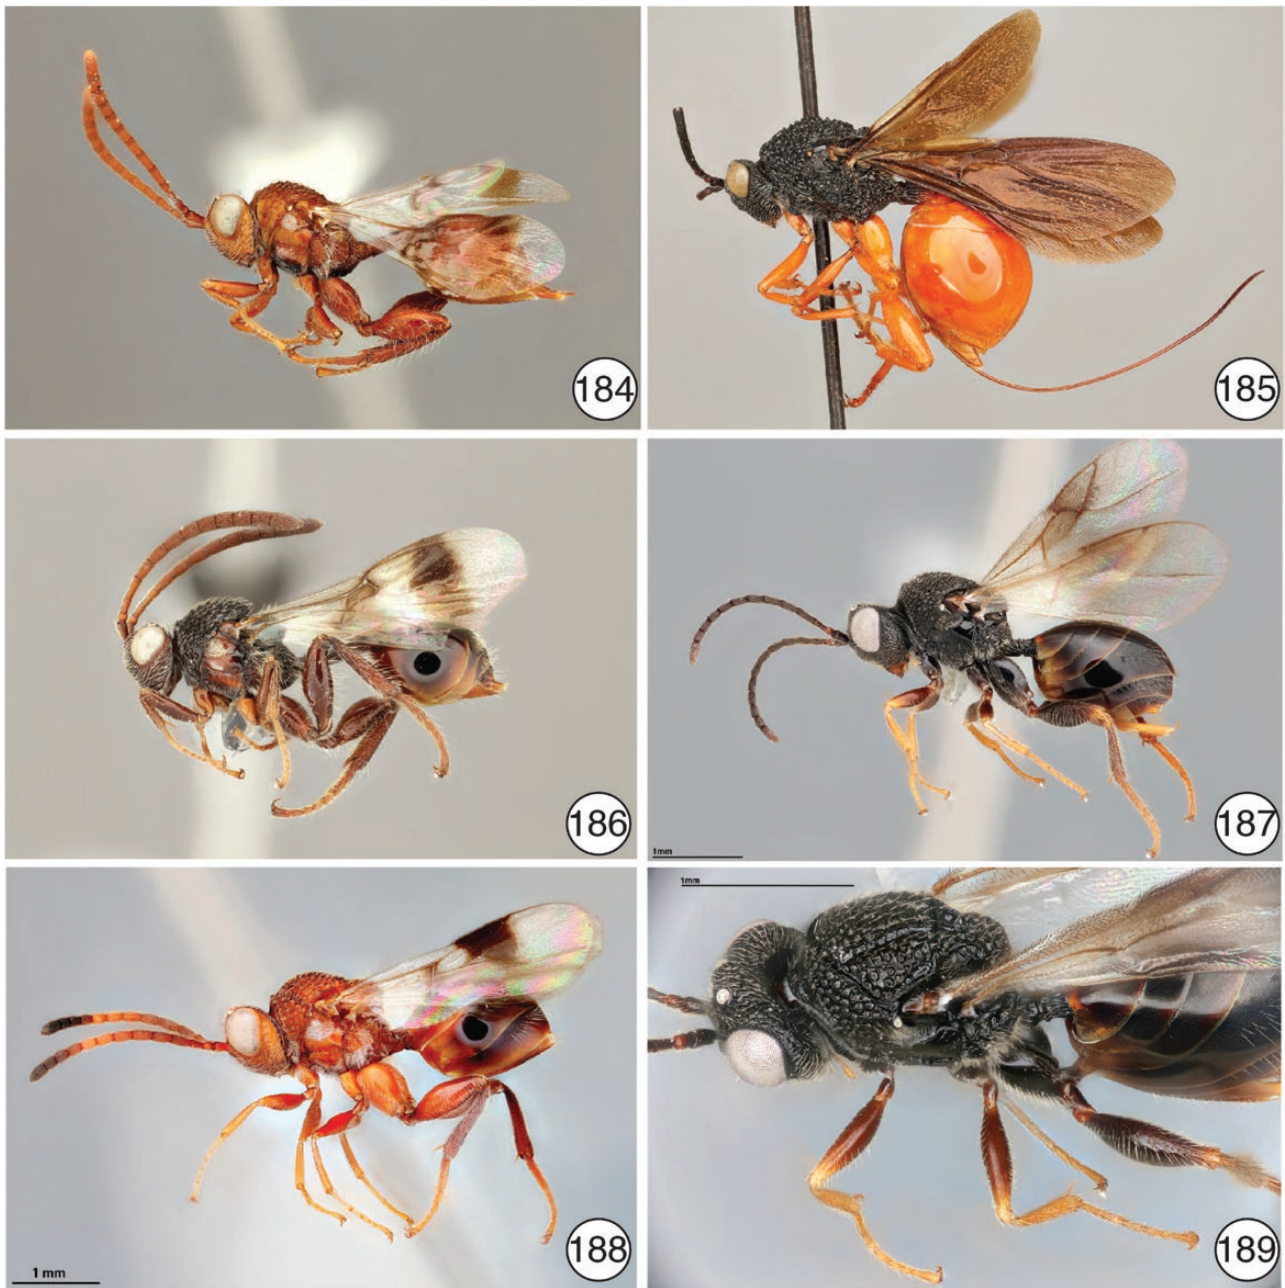

**Plate 3.** Liopteridae. Fig. 184, *Liopteron* sp., USNMENT01231879. Fig. 185, *Oberthuerella lenticularis* Saussure, 1890, USNMENT00764775. Fig. 186, *Peras* sp., UFES68459. Figs. 187 and 189, *Paramblynotus virginianus*, USNMENT01231827. Fig. 188, *Paramblynotus* sp., USNMENT01231878.

Relevant literature. [Ronquist and Nordlander \(1989\)](#) provided an exhaustive study of the morphology of *Ibalia rufipes* that remains the basis of all morphological studies among cynipoids; [Liu and Nordlander 1994](#), revision; [Nordlander et al. 1996](#), phylogeny; [Ronquist 1999](#), review.

Classification.

Ibaliidae Thomson, 1862

*Ibalia* Latreille, 1802; 14 species NA, PA, OR, introduced AT, AU

*Heteribalia* Sakagami, 1949; 5 species OR, ePA

*Eileenella* Fergusson, 1992; 1 species Papua New Guinea

### Liopteridae

Figs. 184–189

As with the ibaliids, most members of this family are rather striking in appearance, often to be found outside the cynipoids in museum collections of Hymenoptera. Some are brightly colored, though most species have a dark, black, and shiny appearance. As mentioned elsewhere, liopterids are among the macrocynipoids: large in size, with horizontally strigate mesoscuta. There are no definitive host records, only anecdotal evidence that they are parasitoids of wood-boring insect larvae ([Ronquist 1995a](#), [Buffington et al. 2012](#)). Four subfamilies are recognized, and species/genera have been often been classified in Cynipidae and other groups.

Liopterids are found worldwide except the western Palearctic Region; most species are found in the tropics and subtropics. *Paramblynotus* is the most speciose of all liopterid genera, with an incredible diversity of species in southeast Asia. Most liopterids are rarely encountered in the field, though *Paramblynotus* can be very abundant in Malaise traps during certain times of the year.

**Biology.** Associated with wood; presumably parasitoids of wood-boring insect larvae.

**Distribution.** Worldwide except western Palearctic Region. Of the subfamilies, Mayrellinae has the same distribution as the entire family, whereas the other are more restricted: Dallatorrellinae: Paleotropical; Oberthuerellinae: Afrotropical; Liopterinae: Neotropical.

**Relevant literature.** Hedicke and Kerrich (1940) and Ronquist (1995a) revised the family. Liu et al. (2007) revised *Paramblynotus*. Buffington and van Noort (2012) revised the Oberthuerellinae; van Noort and Buffington (2013) revised Afrotropical Mayrellinae. Ronquist (1995a) provides a complete overview of the family, keys all the genera, and provides a world catalog. Liu et al. (2007) revises *Paramblynotus*, the most speciose of all liopterid genera. Van Noort et al. (2015) reviews all sub-Saharan Africa species and provides a key to genera.

**Classification.**

Liopteridae Ashmead, 1895

Mayrellinae Hedicke, 1922

*Kiefferiella* Ashmead, 1903; 2 species NA

*Paramblynotus* Cameron, 1908; 106 species worldwide except wPA

Dallatorrellinae Kieffer, 1911

*Mesocynips* Cameron, 1903; 1 species OR

*Dallatorrella* Kieffer, 1911; 8 species OR, AU

Oberthuerellinae Hedicke, 1903

*Xenocynips* Kieffer, 1910; 3 species AT

*Tessmannella* Hedicke, 1912; 6 species AT

*Oberthuerella* Saussure, 1903; 18 species AT

Liopterinae Ashmead, 1895

*Liopteron* Perty, 1833; 8 species NT

*Peras* Westwood, 1837; 10 species NT

*Pseudibalia* Kieffer, 1911; 13 species NT

## Cynipidae: Cynipinae

**Note:** Most commonly in recent years, authorship of family-group names based on *Cynips* has been quoted from Latreille (1802). However, Alonso-Zarazaga and Nieves-Aldrey (2002) corrected the authorship of the family since Latreille did not include any actual cynipids in his family, and the name was not made available until later, making 'Billberg, 1820' the correct authorship.

The current classification of the Cynipidae places all extant forms in a single subfamily, with the majority of species falling into one of four tribes: the oak galls (Cynipini), the herb galls (Aylacini), the

rose galls (Diplolepidini), and the inquiline (Synergini). *Ceroptres*, previously classified within Synergini, have recently been placed into their own tribe, the Ceroptresini. *Diastrophus*, galls on rosaceous herbs, were previously classified within Aylacini, are now in their own tribe, Diastrophini, which includes some inquiline genera. Many herb galling genera, previously classified within Aylacini, have been moved to Aulacideini and Phanacidini. Rarer tribes include the Pediaspidini (maple galls), and the Eschatocerini (galls of *Acacia* and *Prosopis* in the Fabaceae). Lastly, two additional rare tribes have been recently described based on morphologically divergent forms from the Southern Hemisphere: Qwaqwaini, including a single gall inducer on *Scolopia* (Salicaceae) in South Africa, and Paraulacini, including two genera (*Paraulax* and *Cecinothofagus*) of inquiline (or possibly parasitoids) in chalcidoid galls on *Nothofagus* (Nothofagaceae) in southern South America (Chile).

Nieves-Aldrey (2001) provides an overview of the Iberian fauna and provides keys to tribes. Ronquist et al. (2015) established several new tribes and provided an illustrated key. Pujade-Villar (2019) follows the same classification of Ronquist et al. (2015) and provides an alternative identification key. Unlike many other insect groups, cynipids can also be readily identified by the gall left behind after the adult wasp has emerged. Weld (1957, 1959, 1960a) pioneered this form of identification, and summarized what was known about gall morphology and host plant records in series of privately printed pamphlets. In addition, Weld's own collection of galls are located at the USNM and have undergone recuration recently. More recently, Russo (2006) has updated much of Weld's work, and includes not only color images of galls, but also covers other galling insects of North America. Further, Coulianos and Holm asen (1991) provide an overview of galls in Scandinavia.

## Aulacideini

Figs. 190–192

This recently circumscribed tribe includes many taxa formerly treated in Aylacini, many species of which are treated by Nieves-Aldrey (1994). Members moved to Aulacideini include species that are galls on Lamiaceae and Asteraceae (Ronquist et al. 2015), but do not include the galls of Papaveraceae (now Aylacini) or Rosaceae (now Diastrophini).

**Biology.** Gall inducers on various herbaceous plants in Asteraceae, Lamiaceae, Valerianaceae, and some Papaveraceae (Ronquist et al. 2015). *Aulacidea subterminalis* have been used in the biological control of invasive weeds in North America (APHIS 2011) and New Zealand (Syrett et al. 2001).

**Distribution.** Holarctic.

**Relevant literature.** Ronquist et al. (2015) described the tribe; Ronquist (1994) and Liljeblad and Ronquist (1998) treated species in this group phylogenetically using morphology. Melika (2006) reviewed the western Palearctic fauna. Buffington et al. (2017) reported on *Antistrophus* on *Silphium*. *Neaylax salviae* was detailed in Nieves-Aldrey (2002); Zerova et al. (2003) described the morphology and biology of *Salviela* Melika. Life cycle of *Aulacidea subterminalis* has been studied in depth by Syrett et al. (2001) and introduced into New Zealand and North America for weed control.

**Classification.**

Aulacideini Nieves-Aldrey, Nylander and Ronquist, 2015 (the availability and authorship of this name is disputed and will hopefully be settled soon)



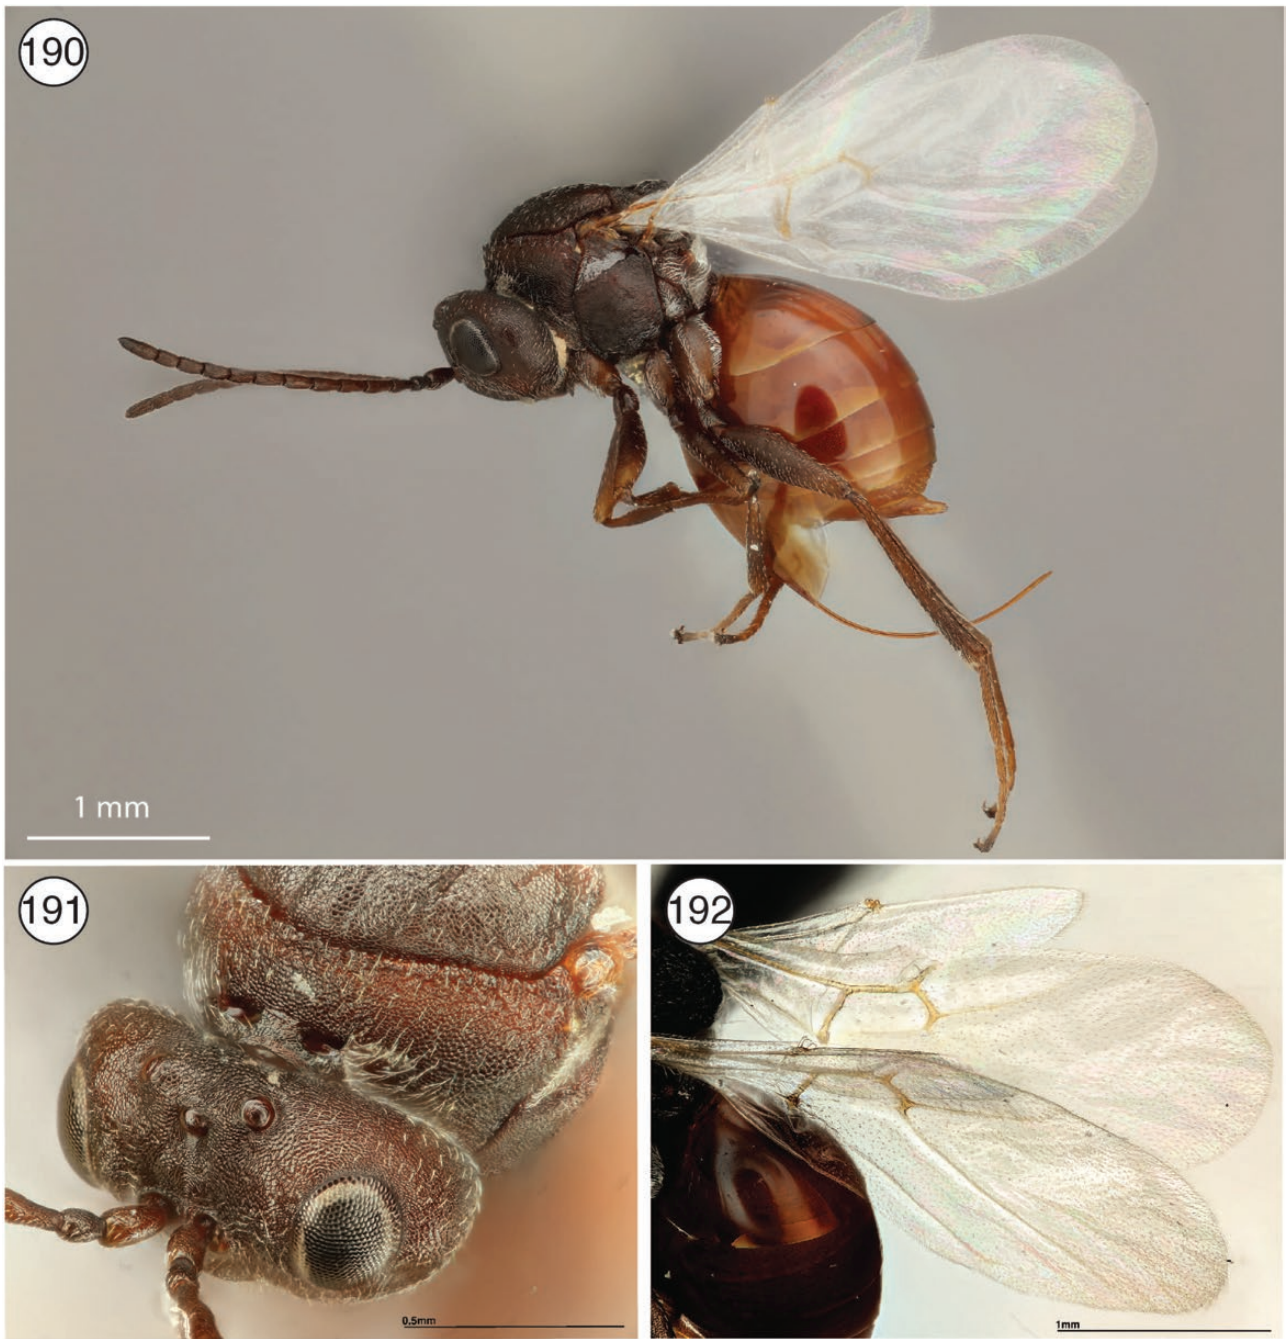

Plate 4. Aulacideini. Figs. 190–192. *Antistrophus laciniatus*. USNMNT01448496

*Antistrophus* Walsh, 1869; 10 species NA

*Aulacidea* Ashmead, 1897; 38 species PA, NA

*Cecconia* Kieffer, 1902; 1 species wPA

*Hedickiana* Nieves-Aldrey, 1994; 1 species wPA

*Isocolus* Förster, 1869; 26 species PA

*Liposthenes* Förster, 1869; 3 species PA, introduced NA

*Neaylax* Nieves-Aldrey, 1994; 4 species PA

*Panteliella* Kieffer, 1902; 3 species PA

*Rhodus* Quinlan, 1968; 1 species wPA

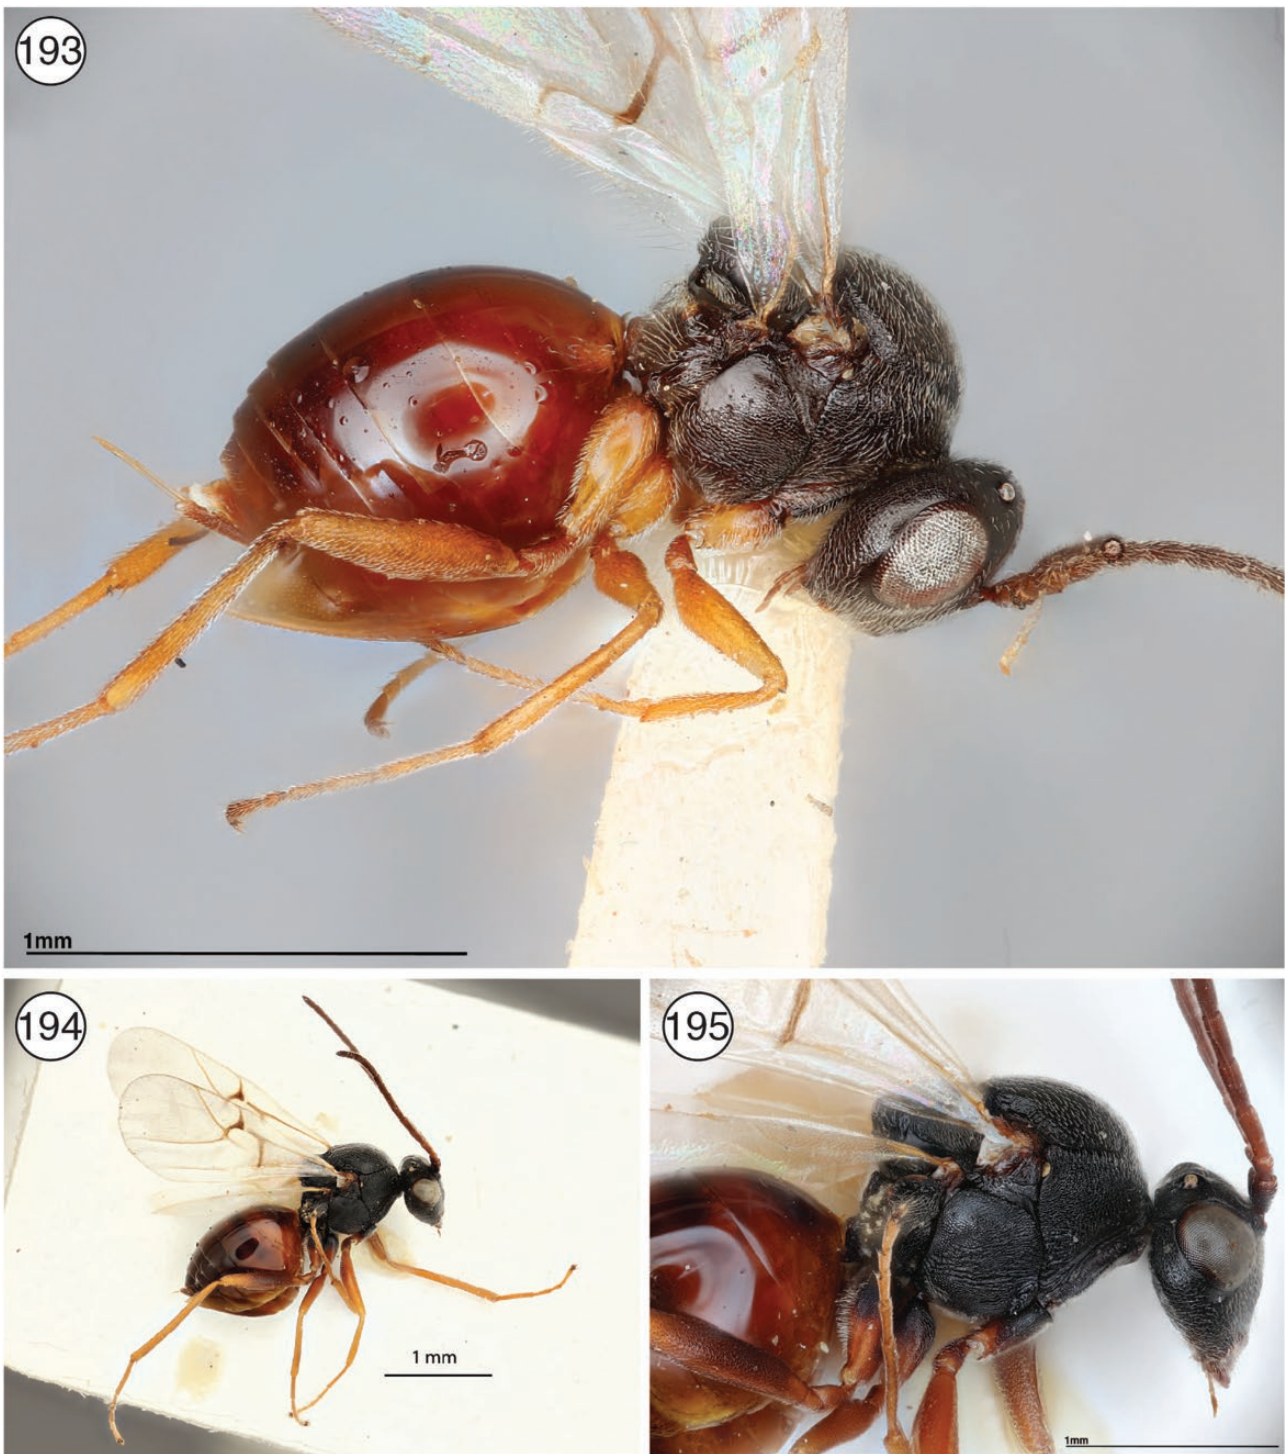

Plate 5. Aylacini. Fig. 193. *Aylax papaveris*, lateral view, USNMENT01231856. Figs. 194 and 195. *Barbotinia oranienis*, USNMENT01448491.

### Aylacini

Figs. 193–195

Ronquist (1994) argued that this tribe, as it was circumscribed, was not monophyletic, and formed the basal lineages of Cynipidae. Following this, Liljeblad and Ronquist (1998) presented more robust data to support splitting up Aylacini, but no action was taken until Ronquist et al. (2015). We now recognize this tribe as being restricted to species galling *Papaver* in the Palearctic region. Several taxa previously classified in this tribe can now be

found in Aulacideini, Phanacidini, and Diastrophini. These taxa all shared the trait of being gallers of herbs and other non-woody plants; Ronquist et al. (2015) concluded that these are unrelated host shifts.

Biology. Gall inducers on *Papaver* in the Palearctic Region.

Distribution. Palearctic Region. Occasionally intercepted on plants being imported to North America; possibly introduced into other regions (Buffington, personal observation).



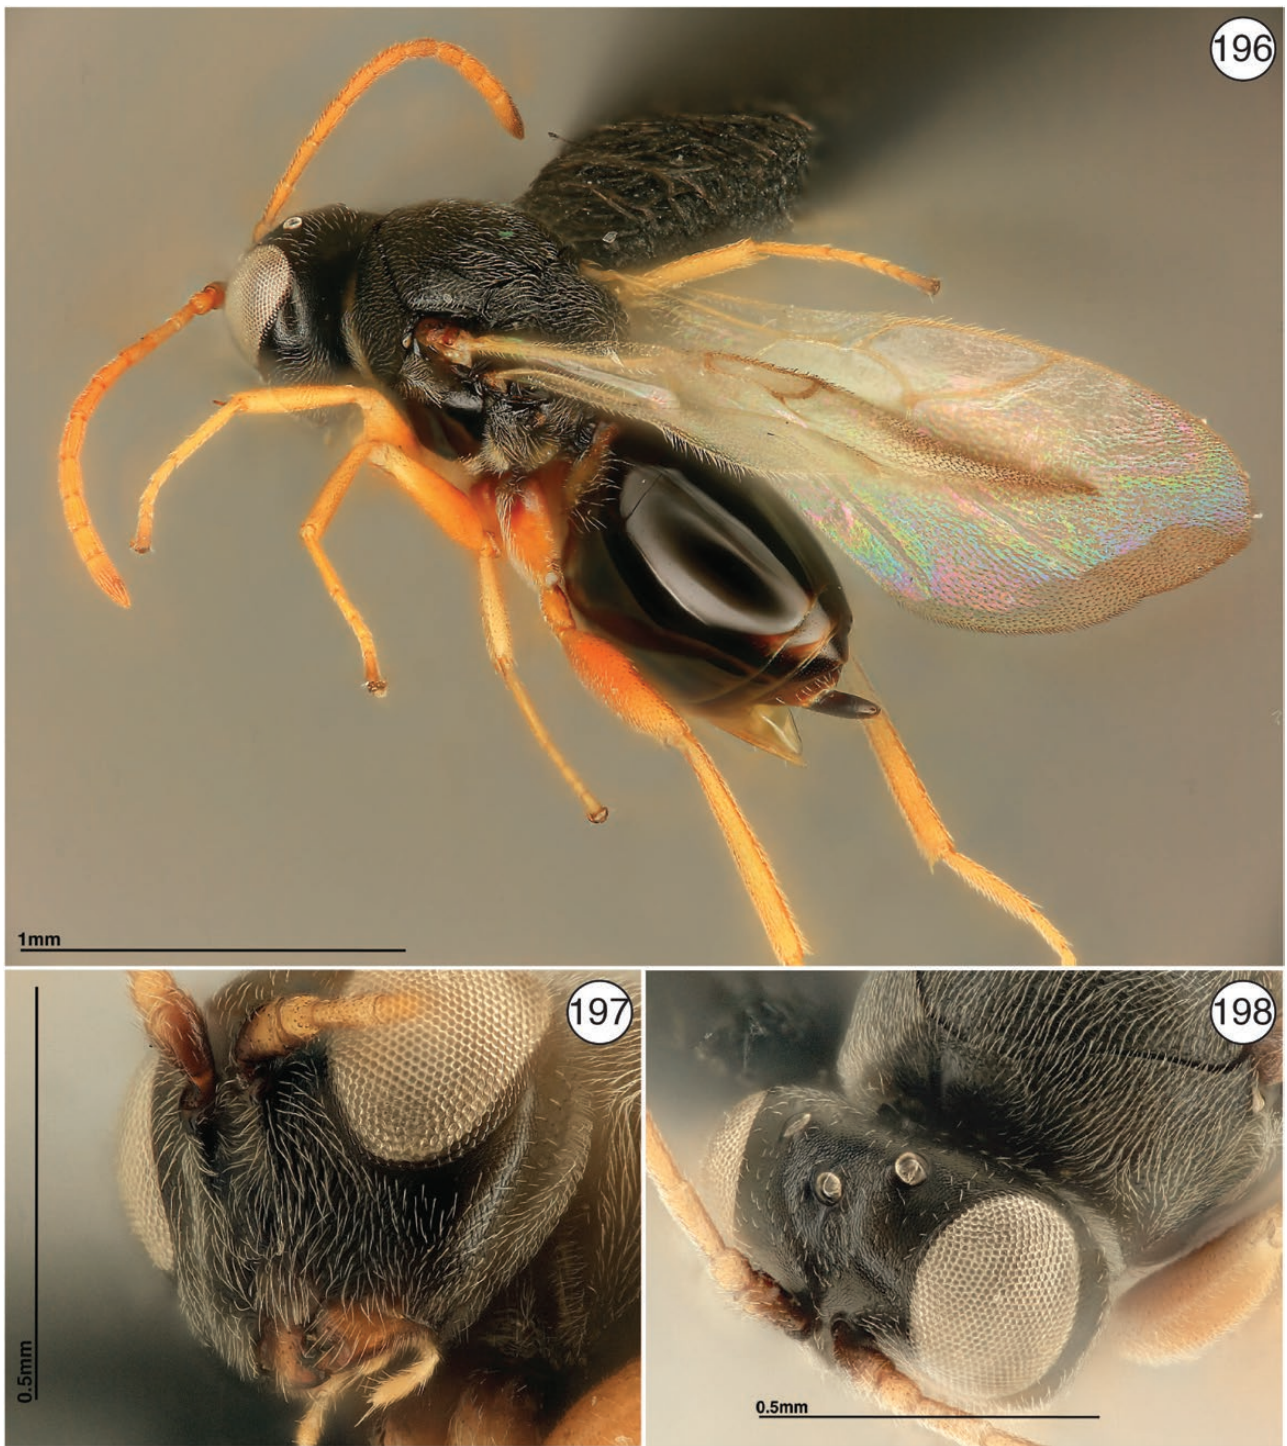

Plate 6. Ceroptresini. Figs. 196–198. *Ceroptres* sp. USNMENT00917016

Relevant literature. [Ronquist et al. \(2015\)](#) circumscribed our current recognition of this tribe and summarized the biology; [Ronquist \(1994\)](#) and [Liljeblad and Ronquist \(1998\)](#) treated the group phylogenetically based on morphology. [Nieves-Aldrey \(1994\)](#) treated Thomson's Aylacini, many of which are now in Aulacideini. [Melika \(2006\)](#) reviewed the western Palearctic fauna.

Classification.

Aylacini Ashmead, 1903

*Aylax* Hartig, 1840; 20 species PA, introduced NA  
*Barbotinia* Nieves-Aldrey, 1994; 1 species wPA  
*Iraella* Nieves-Aldrey, 1994; 3 species wPA

**Ceroptresini**

Figs. 196–198

This very small tribe was erected as the species contained here render *Synergus* paraphyletic. As a result of the topology recovered in [Ronquist et al. \(2015\)](#), *Ceroptres* was moved to the novel tribe Ceroptresini.



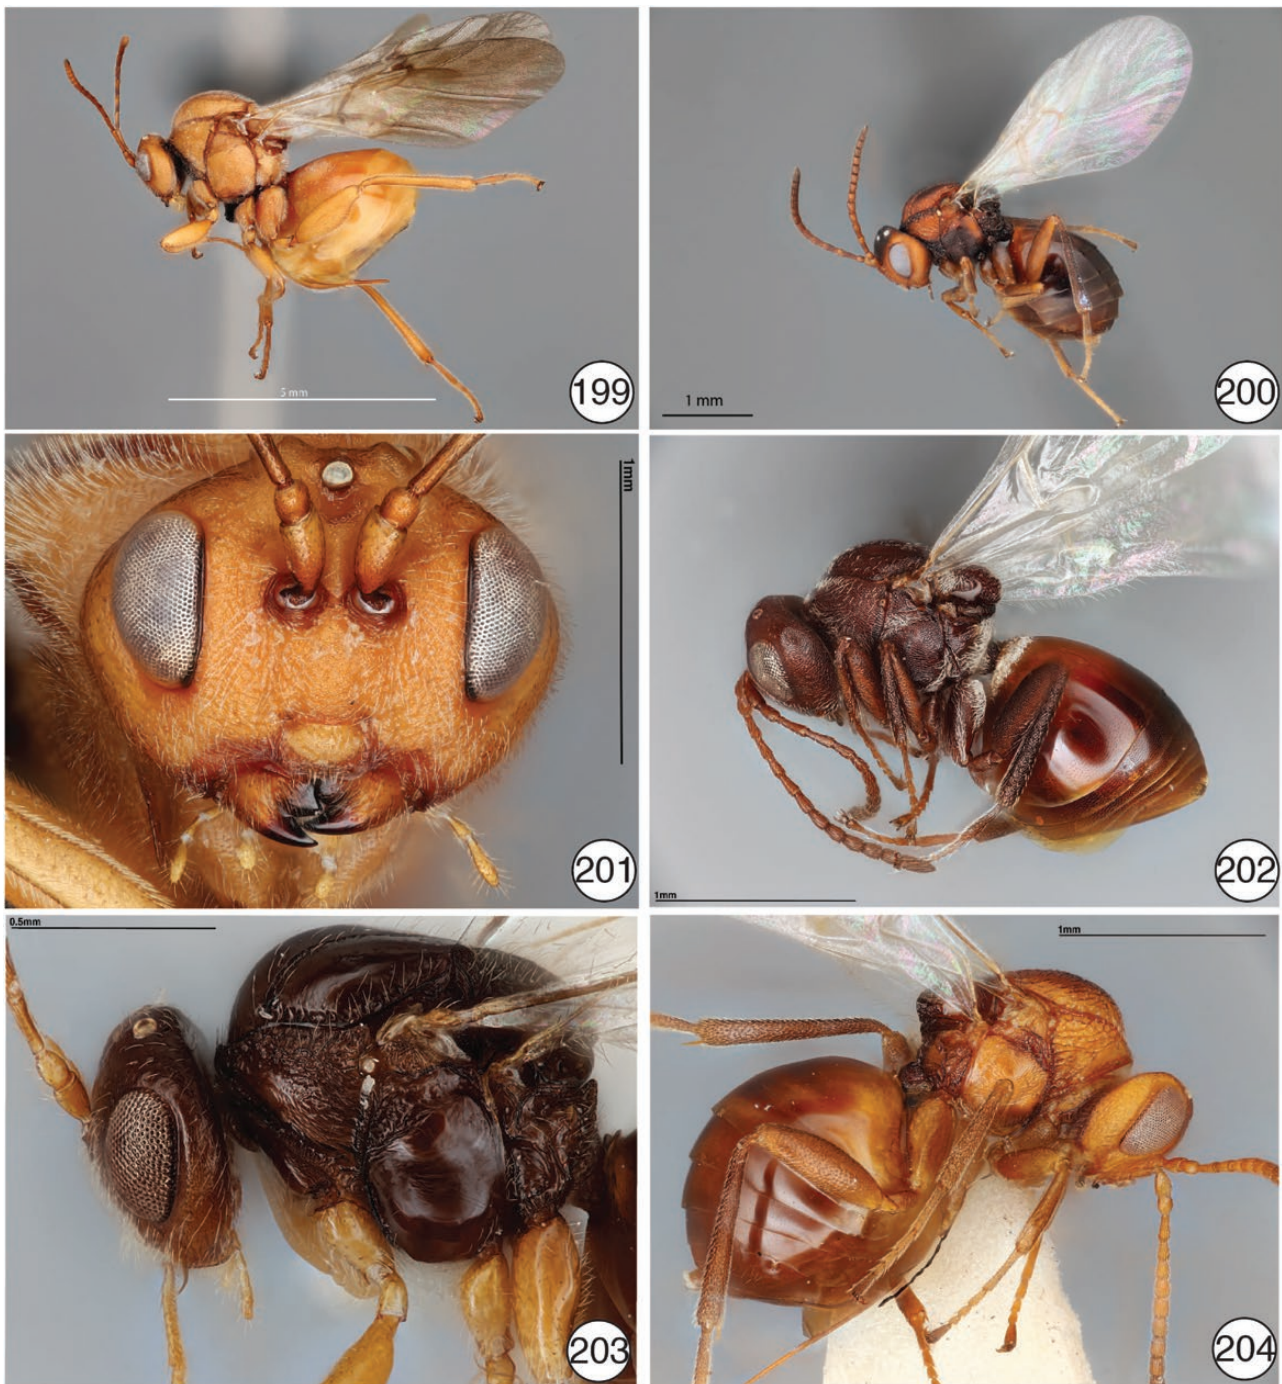

**Plate 7.** Cynipini. Figs. 199 and 201, *Andricus quercuscalifornicus*, USNMENT01231839. Fig. 200, *Melikaiella tumifica* (Osten-Sacken, 1865), USNMENT01525885. Fig. 202, *Zapatella davisae* Buffington & Melika, 2016, USNMENT01231884. Fig. 203, *Dryocosmus kuriphilus*, USNMENT01231861. Fig. 204, *Callirhytis glandium*, USNMENT01231862.

**Biology.** Possibly inquilines of Cynipini on oaks (Ronquist et al. 2015).

**Distribution.** Holarctic.

**Relevant literature.** Tribe circumscribed in Ronquist et al. (2015); revised by Lobato-Vila and Pujade-Villar (2019).

**Classification.**

Ceroptresini Nieves-Aldrey, Nylander and Ronquist, 2015

*Ceroptres* Hartig, 1840; 21 species NA, PA

*Buffingtonella* Lobato-Vila and Pujade-Villar, 2019; 1 species NA

### Cynipini

Figs. 199–204

The majority of cynipid species belong to this single tribe. Members of the tribe are gall inducers on species of *Quercus*, *Castanea*, *Castanopsis*, *Chrysolepis*, and *Lithocarpus* (Fagaceae), by far the largest number on oaks. Many more species and genera are expected to be discovered and described from Asia where Fagaceae



generic diversity is relatively high and little work has been done on the Cynipini fauna until recently (e.g., Tang et al. 2009; Ide et al. 2010; Tang et al. 2011; Melika et al. 2011; Ide et al. 2012; 2013; Melika et al. 2013b; Ide and Abe 2015; Tang et al. 2016). New genera and new species have also been continuously discovered in the Nearctic and Neotropics (e.g., Medianero and Nieves-Aldrey 2011; Medianero et al. 2011; Nieves-Aldrey et al. 2012; Pujade-Villar et al. 2012a, b; Pujade-Villar et al. 2013; Medianero and Nieves-Aldrey 2013), highlighting the fact that the taxonomy of Cynipini is still far from complete. Taxonomy of Cynipini has been controversial, including several species previously classified in *Andricus* and *Callirhytis* having been moved between these two genera (Burks 1979), and several Nearctic *Callirhytis* species transferred to newly erected genera *Kinseyella* (Pujade-Villar et al. 2010) and *Zapatella* (Pujade-Villar et al. 2012b) and *Melikaiella* (Pujade-Villar et al. 2014). Two Palaeartic genera, *Belizinella* Kovalev and *Ussuraspis* Kovalev, were synonymized with *Trigonaspis* (Melika and Abrahamson 2002), but then reestablished as valid genera (Melika 2012). Three Nearctic genera, *Dros* Kinsey, *Erythres* Kinsey, and *Femuros* Kinsey, were synonymized with *Andricus* (Melika and Abrahamson 2002) but then reestablished as valid genera (Pujade-Villar and Melika 2014, Pujade-Villar and Ferrer-Suay 2015, Pujade-Villar et al. 2017). Lastly, *Sphaeroteris*, synonymized with *Biorhiza* by Melika and Abrahamson (2002), was reestablished as a valid genus (Pujade-Villar et al. 2018).

**Biology.** The life cycle of Cynipini involves cyclical parthenogenesis (heterogony), with a sexual generation where males and females mate to produce an asexual generation of only females, that reproduce parthenogenetically and gives rise to a new bisexual generation. The two generations differ in terms of the gall phenology, galling positions, gall structure, and adult morphology and size. These biological distinctions have been led the two generations of the same species classified as different species and even as different genera in the past. Two Palaeartic genera, *Andricus* and *Callirhytis*, are host alternators (heteroecy) that their life cycles alternate between two host-plant subgroups, section *Cerris* and section *Quercus* sensu stricto in the genus *Quercus*. Although in some species, the two alternating generations have been associated, for many species they have not yet been matched. Field observation is a firm approach to associate the two generations, however, DNA barcoding is another useful tool to pair the two generations (e.g., Ács et al. 2007, Melika et al. 2013a, Nicholls et al. 2018). There are only three exceptions in Cynipini known to reproduce purely parthenogenetically. The first case is the global pest, the chestnut gallwasp *Dryocosmus kuriphilus* Yasumatsu (Aebi et al. 2006). This species has one generation per year and has been introduced into Europe, North America, and some countries in Asia outside its native region in China. The other two species, *Andricus targionii* Kieffer and *A. pseudoflos* (Monzen), from Japan, Korea, China and Far East of Russia, are derived from their cyclically parthenogenetic ancestors *A. mukaigawae* (Mukaigawa) and *A. kashiwaphilus* Abe through the deletion of sexual generation (Abe 2007). Oak gallwasps have been very conservative on their host-plant choices, and host switches were extremely rare in the evolution of oak gallwasps (Stone et al. 2009).

**Distribution.** Holarctic, Neotropical, and Oriental Regions.

**Relevant literature.** Nieves-Aldrey (2001) reviews the Iberian fauna. Melika and Abrahamson (2002) made a world revision of Cynipini on the basis of Weld's Cynipoidea monograph (Weld 1952). Stone et al. (2002) and Csóka et al. (2005) reviewed the general biology, ecology,

and evolution of Cynipini, and Abe et al. (2007) reviewed species richness, host-plant diversity, and background on the hypotheses of geographic origin of Cynipini. The Western Palaeartic fauna of Cynipini is reviewed in Melika (2006) on the basis of the Ukrainian fauna. Melika et al. (2010) made a taxonomic revision of species, particularly those that gall section *Cerris* of *Quercus* in the Palaeartic and Oriental region. The most recent knowledge of Cynipini in Eastern Palaeartic and Oriental region is reviewed in Péntzes et al. (2018)

#### Classification

##### Cynipini Billberg, 1820

- Acraspis* Mayr, 1881; 20 species NA
- Amphibolips* Reinhard, 1865; 53 species NA, NT
- Andricus* Hartig, 1840; ca 375 species but taxonomy is uncertain and far from stable with many more or less dubious taxa NA, PA, OR, NT
- Aphelonyx* Mayr, 1881; 3 species PA
- Atrusca* Kinsey, 1930; 59 species but taxonomy is uncertain NA, NT
- Barucynips* Medianero and Nieves-Aldrey, 2013; 1 species NT
- Bassettia* Ashmead, 1887; 9 species NA
- Belizinella* Kovalev, 1965; 2 species ePA
- Belonocnema* Mayr, 1881; 2 species NA
- Biorhiza* Westwood, 1840; 6 species PA, NA
- Callirhytis* Förster, 1869; 80 species but taxonomy is uncertain and far from stable NA, PA
- Cerroneuroterus* Melika and Pujade-Villar, 2009; 9 species PA, OR
- Chilaspis* Mayr, 1881; 2 species wPA
- Coffeikokkos* Pujade-Villar and Melika, 2012; 2 species NT
- Cyclocynips* Melika, Tang and Sinclair, 2013; 2 species OR
- Cycloneuroterus* Melika and Tang, 2011; 17 species OR, ePA
- Cynips* Linnaeus, 1758; ca 75 species but taxonomy is uncertain and far from stable with many more or less dubious taxa NA, PA, NT
- Disholcaspis* Dalla Torre and Kieffer, 1910; 55 species NA, NT
- Dros* Kinsey, 1937; 5 species NA
- Dryocosmus* Giraud, 1859; 50 species but diagnostic characters need to be revised and new genera will be erected; PA, NA, OR
- Erythres* Kinsey, 1937; 2 species NA
- Eumayria* Ashmead, 1887; 6 species NA
- Eumayriella* Melika and Abrahamson, 1997; 2 species NA
- Femuros* Kinsey, 1937; 7 species NA
- Heteroecus* Kinsey, 1922; 12 species NA
- Holocynips* Kieffer, 1910; 5 species NA
- Kinseyella* Pujade-Villar and Melika, 2010; 2 species NA
- Kokkocynips* Pujade-Villar and Melika, 2013; 1 species NT
- Latuspina* Monzen, 1954; 9 species ePA, OR
- Loxaulus* Mayr, 1881; 17 species NA, NT
- Melikaiella* Pujade-Villar, 2014; 14 species NA
- Neuroterus* Hartig, 1840; 79 species but taxonomy is uncertain and far from stable including more or less dubious taxa; PA, NA, NT
- Odontocynips* Kieffer, 1910; 3 species NA, NT
- Philonix* Fitch, 1859; 7 species NA
- Phylloteris* Ashmead, 1897; 9 species NA
- Plagiotrochus* Mayr, 1881; 22 species PA, OR
- Protobalandricus* Melika, Nicholls and Stone, 2018; 1 species NA
- Pseudoneuroterus* Kinsey, 1923; 4 species wPA

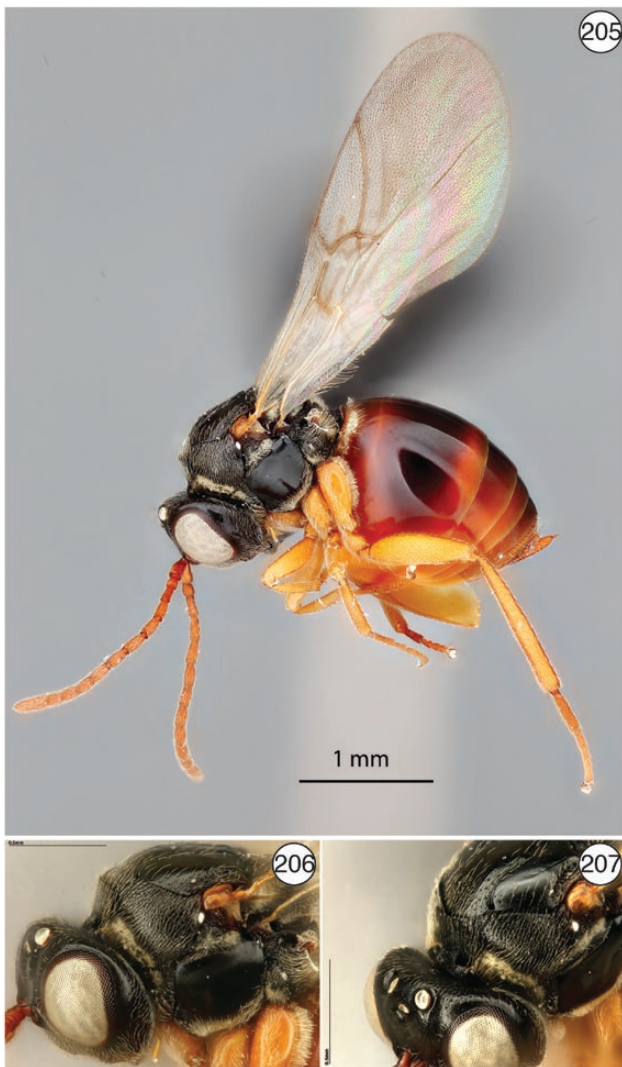

Plate 8. Diastrophini. Figs. 205–207, *Diastrophus kinkaidii*, USNMNT01448499.

*Sphaeroterus* Ashmead, 1897; recently resurrected with 5 species; NA, NT  
*Striatoandricus* Pujade-Villar, 2020; 6 species NA  
*Trichagalma* Mayr, 1907; 3 species ePA, OR  
*Trigonaspis* Hartig, 1840; 22 species PA, NA  
*Ussuraspis* Kovalev, 1965; 1 species ePA  
*Zapatella* Pujade-Villar and Melika, 2012; 13 species NA, NT  
*Zopheroterus* Ashmead, 1897; 6 species NA

## Diastrophini

Figs. 205–207

This tribe, circumscribed in [Ronquist et al. \(2015\)](#), contains the gallers *Diastrophus* and *Xestophanes*, formerly included in the tribe Aylacini, and the inquilines *Periclistus* and *Synophromorpha*, formerly included in the Synergini. Both the gallers and the inquilines are associated with host plants in the family Rosaceae. With respect to the inquilines, this appears to be a case of agastoparasitism, where the inquiline of a gall inducer is a close relative. Hence, including these inquilines in Synergini rendered that tribe paraphyletic.

**Biology.** Species are associated with Rosaceae (*Rosa*, *Rubus*), with both gall-inducers (*Diastrophus*, *Xestophanes*) or inquilines (*Periclistus*, *Synophromorpha*). A very common host plant are species of *Rubus*. Records of association with the monocot *Smilax* ([Ashmead 1896](#), [Ronquist et al. 2015](#)) are probably erroneous ([Buffington and Gates, pers. obs.](#)).

**Distribution.** Holarctic, transgressing into the Neotropics.

**Relevant literature.** Tribe is circumscribed and diagnosed in [Ronquist et al. \(2015\)](#). [Ronquist \(1994\)](#) first investigated the group phylogenetically and recognized the Aylacini where these genera previously were classified) as paraphyletic. [Ritchie and Shorthouse \(1987\)](#) revised *Synophromorpha*.

**Classification.**

Diastrophini Nieves-Aldrey, Nylander and Ronquist, 2015

*Diastrophus* Hartig, 1840; 19 species NA, PA, NT

*Periclistus* Förster, 1869; 16 species NA, PA

*Synophromorpha* Ashmead, 1903; 6 species NA, ePA

*Xestophanes* Förster, 1869; 4 species PA, ePA

## Diplolepidini

Figs. 208–210

Members of this tribe are all gallers of *Rosa* in the Holarctic Region. The wide variety of galls produced by these species, and the relative ease of locating them in the field, has led to a rather extensive literature on the biology and ecology of these wasps. A very thorough review by [Shorthouse \(1993\)](#) describes in detail the research on the diplolepidine wasps, including gall induction, larval feeding, life cycle aspects, and parasitoids. As hybridization among rose species can be common, confusing the taxonomy of the group, rose gallers seem to have adapted to intermediate species, much in the same way oak gallers in the Cynipini seem to have ‘specialized’ on intermediate oak species.

Morphologically, these wasps all share a rather unique hypopygium that extends ventrally, and has been described as ‘plough-share shaped’ in literature. Phylogenetically, [Liljeblad and Ronquist \(1998\)](#) recovered this group as sister to *Eschatocerus*, with



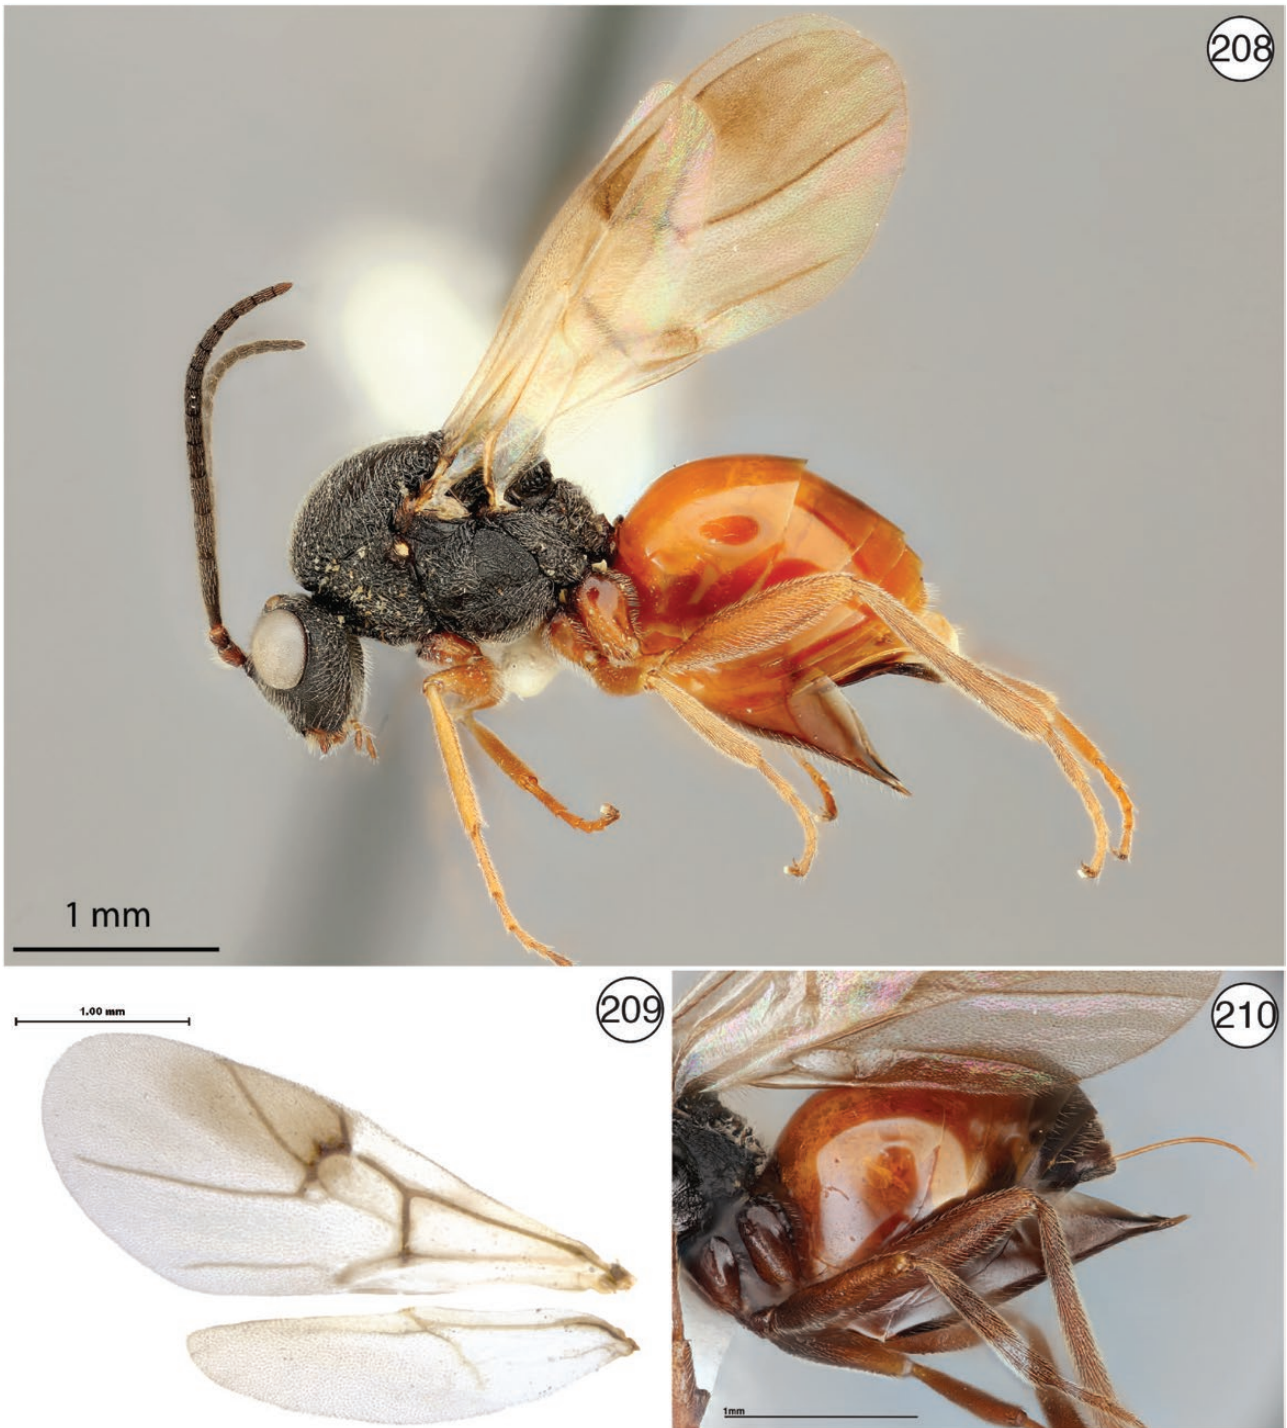

**Plate 9.** Diplolepidini. Fig. 208, *Diplolepis* sp., USNMENT01231850. Fig. 209, *Diplolepis rosae*, USNMENT00655959. Fig. 210, *Diplolepis bicolor*, USNMENT01231831.

low support. More recently, [Ronquist et al. \(2015\)](#) found the group sister to Pediaspini and Eschatocerini.

**Biology.** Gall inducers on *Rosa* (Rosaceae).

**Distribution.** Holarctic. Could be moved into non-native areas with horticultural products.

**Relevant literature.** [Shorthouse \(1993, 2001\)](#) are the most comprehensive reviews to date; [Ronquist \(1994, 1999\)](#), [Liljeblad](#)

[and Ronquist \(1998\)](#), and [Ronquist et al. \(2015\)](#) investigated the phylogenetics of the group.

**Classification.**

Diplolepidini Latreille, 1802

*Diplolepis* Geoffroy, 1762; 52 species but taxonomy is uncertain and far from stable with many more or less dubious taxa; NA, PA *Liebelia* Kieffer, 1903; 9 species PA

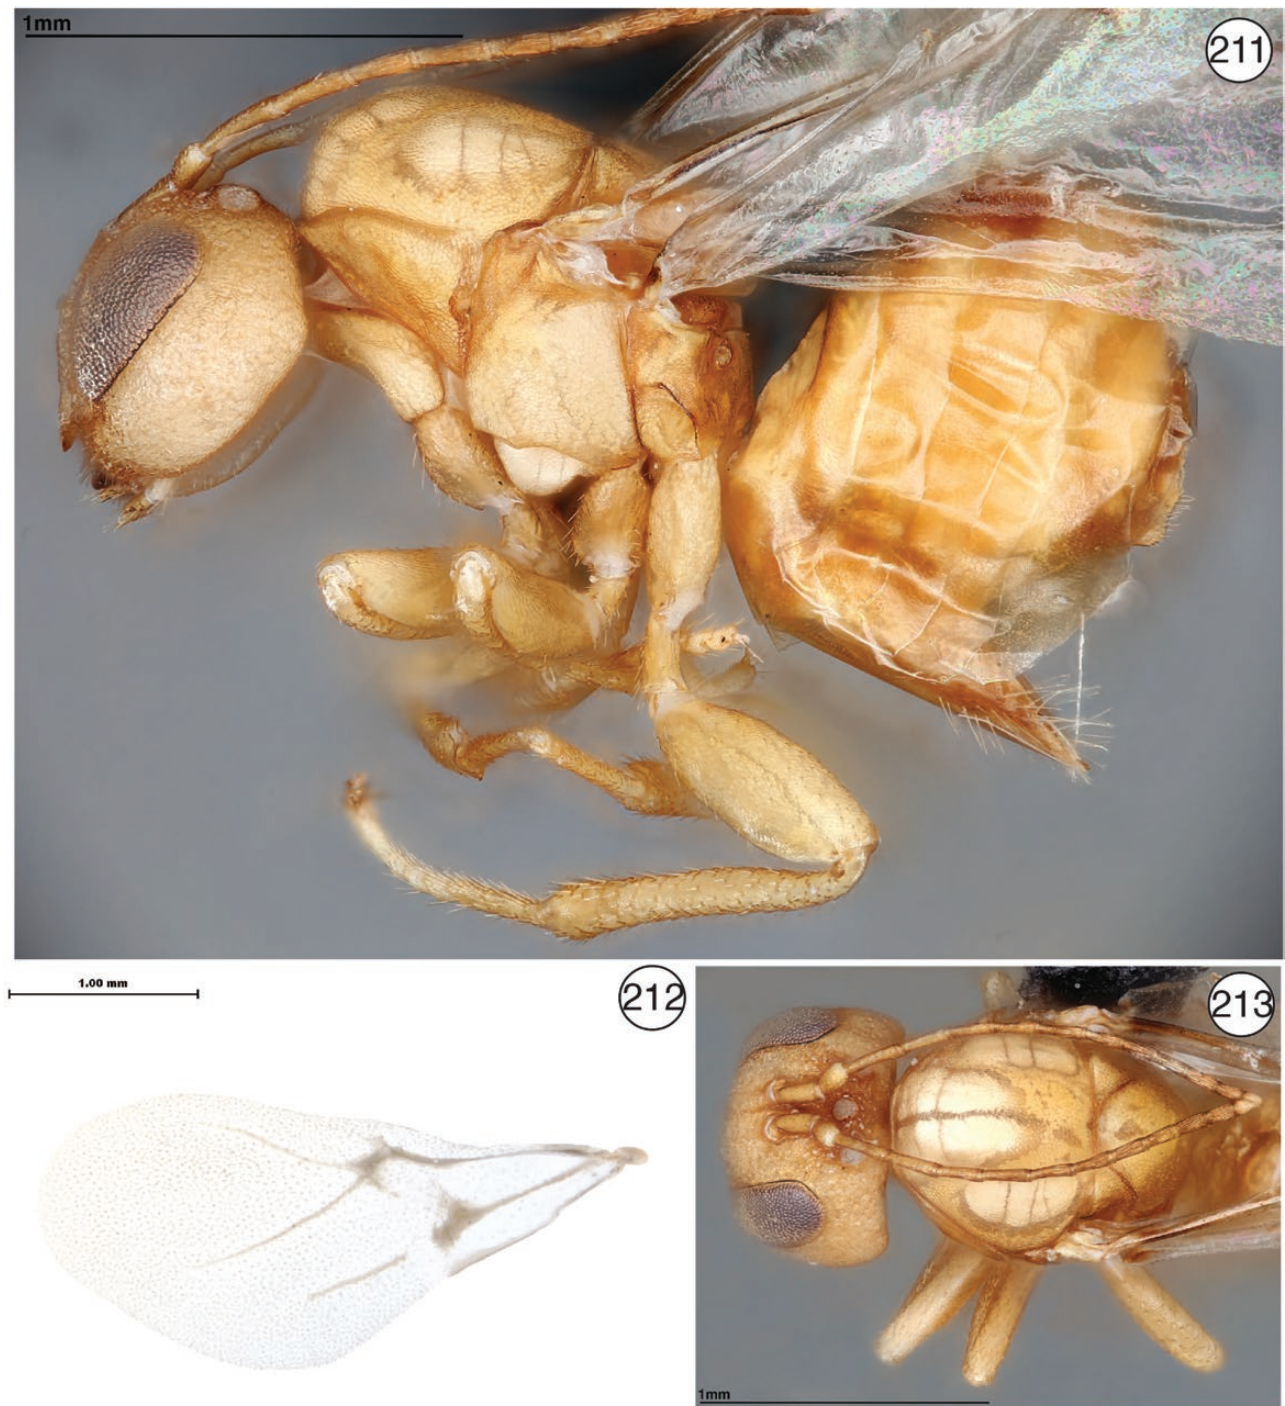

Plate 10. Eschatocerini. Figs. 211–213, *Eschatocerus acaciae*, USNMENT01231863 and USNMENT00655966.

### Eschatocerini

Figs. 211–213

This monotypic tribe may feel unsatisfactory for taxonomy, but its erection is based on phylogeny (Ronquist et al. 2015). This unusual group can be readily collected when host plants are located; otherwise, the taxon is rarely collected.

Biology. Species are gall inducers on *Prosopis* spp. and *Acacia* spp. (Fabaceae) in South America.

Distribution. Arid regions of the Neotropics.

Relevant literature. Nieves-Aldrey and San Blas (2015) revised the tribe and described the biology in depth; Ronquist (1995b) and Ronquist et al. (2015) studied the phylogenetic placement of the group.

Classification.

Eschatocerini Ashmead, 1903

*Eschatocerus* Mayr, 1881; 3 species NT



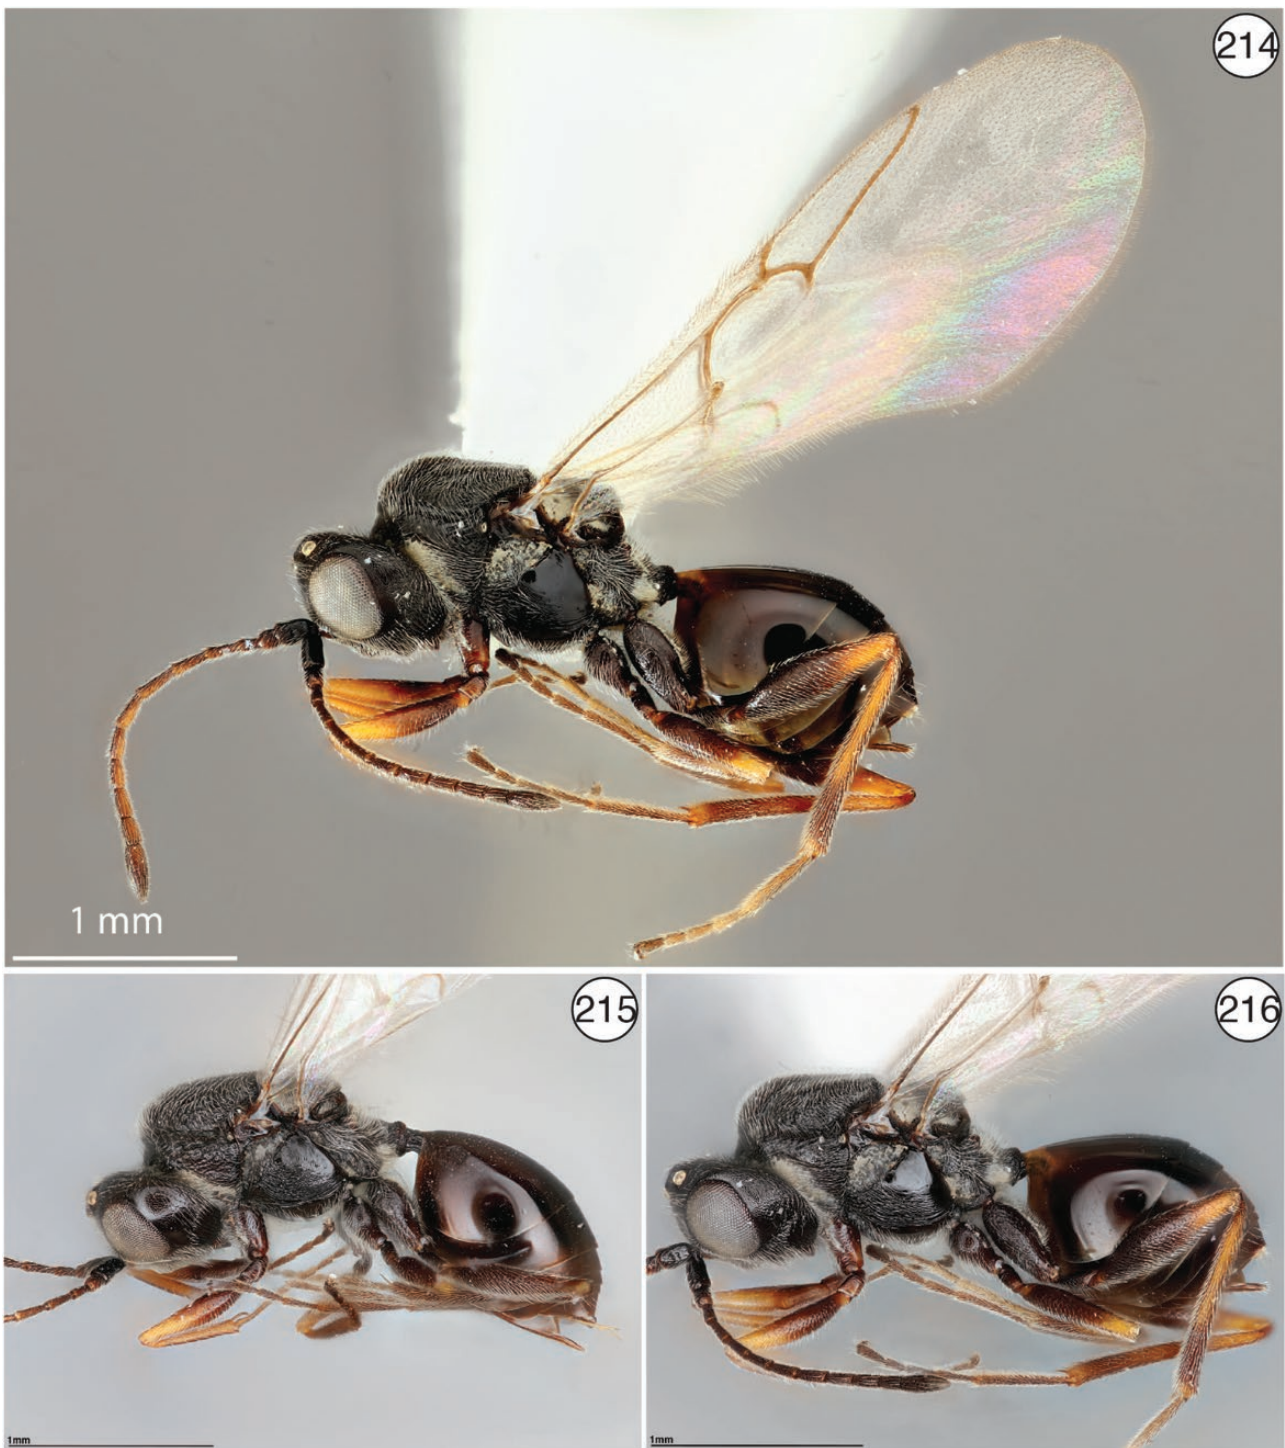

Plate 11. Paraulacini. Figs. 214 and 216, *Paraulax queulensis*, USNMMENT01231854. Fig. 215, *Cecinothophagus* sp., USNMMENT01231851.

### Paraulacini

#### Figs. 214–216

Species of Paraulacini have been reared from galls on *Nothofagus* spp. in southern Chile and Argentina. However, it is unclear whether these wasps are gall inducers, inquilines of chalcidoid gall inducers, or parasitoids of chalcidoid gall inducers (Ronquist et al. 2015). *Paraulax* was described by Kieffer (1904) and was tentatively placed in Aylacini (Dalla Torre and Kieffer 1910; Weld 1952), later

in Cynipini (Ronquist 1999), then in Pediaspidini (Liljeblad et al. 2008). Nieves-Aldrey et al. (2009), based on biology and phylogeny, circumscribed Paraulacini to accommodate species in *Paraulax* as well as the new genus *Cecinothofagus*.

Biology. Unknown. Reared from galls on *Nothofagus* trees (Nothofagaceae).

Distribution. Southern South America.

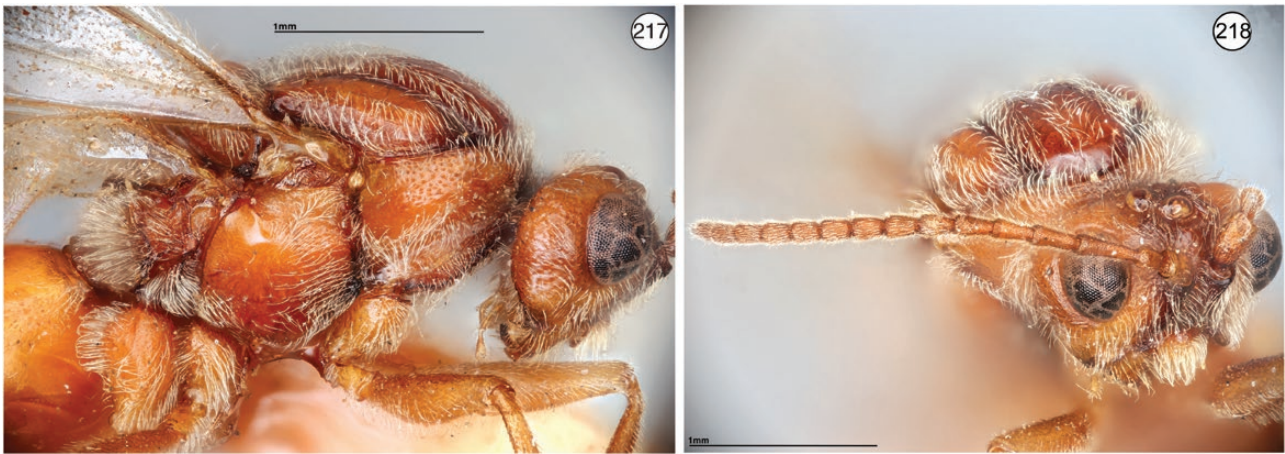

Plate 12. Pediaspidini. Figs. 217 and 218. *Pediaspis aceris*, USNMENT01231852.

Relevant literature. [Nieves-Aldrey et al. \(2009\)](#) summarizes the group completely.

Classification.

Paraulacini Nieves-Aldrey and Liljeblad, 2009

*Cecinothofagus* Nieves-Aldrey and Liljeblad, 2009; 3 species NT

*Paraulax* Kieffer, 1904; 3 species NT

### Pediaspidini

[Figs. 217 and 218](#)

The name has been rendered alternately as Pediaspini and Pediaspidini in literature. Pediaspidini is the linguistically correct, and there is no prevailing usage that speaks for the other option. This tribe of Palearctic species gall *Acer* spp. *Himalocynips* (biology

unknown) was originally described in its own family ([Yoshimoto 1970](#)).

Biology. Gall inducers on maple trees (*Acer* spp; Sapindaceae).

Distribution. Palearctic Region. *Himalocynips* only known from Nepal ([Yoshimoto 1970](#)).

Relevant literature. [Ronquist \(1995b\)](#) suggested the inclusion of *Himalocynips* within Pediaspidini, and has been followed since.

Classification.

Pediaspidini Ashmead, 1903

*Himalocynips* Yoshimoto, 1970; 1 species Himalaya

*Pediaspis* Tischbein, 1852; 1 species WPA, NT



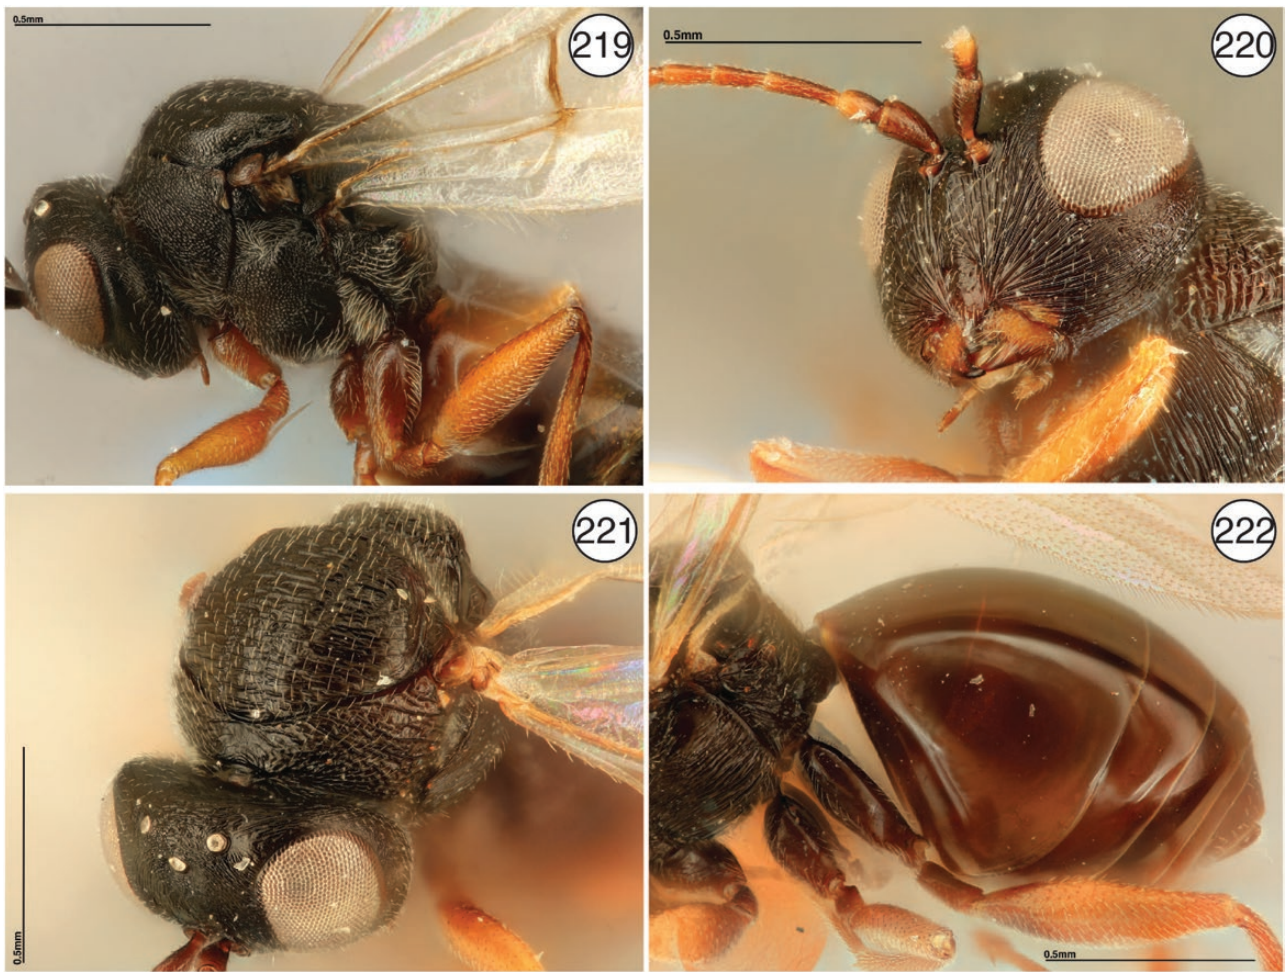

Plate 13. Phanacidini. Figs. 219 through 222. *Phanacis* sp., USNMENT01448498.

### Phanacidini

Figs. 219–222

Much like the Aulacideini, members of Phanacidini are herb gallers on Asteraceae. The phylogenetic analysis of Ronquist et al. (2015) found these species, previously included in Aylacini, rendered that tribe polyphyletic. Hence, these species were removed into the novel tribe Phanacidini.

Biology. Mostly stem gall inducers on Asteraceae, with a few species on Lamiaceae and Apiaceae.

Distribution. Palearctic Region, most species in arid Southwest & Central Asia. *Phanacis* recorded from Kenya presumably introduced; intentionally introduced into Australia and South Africa for weed biological control.

Relevant literature. Ronquist et al. (2015) is the most recent treatment of the group; Ronquist (1995b, 1999) discusses issues with the placement of genera now found in this tribe.

### Classification.

Phanacidini Nieves-Aldrey, Nylander & Ronquist, 2015

*Asiocynips* Kovalev, 1982; 4 species central Asia

*Diakontschukia* Melika 2006; 1 species ePA

*Phanacis* Förster, 1869; 30 species PA, introduced AT, NA

*Zerovia* Dyakontshuk, 1988; 1 species central Asia

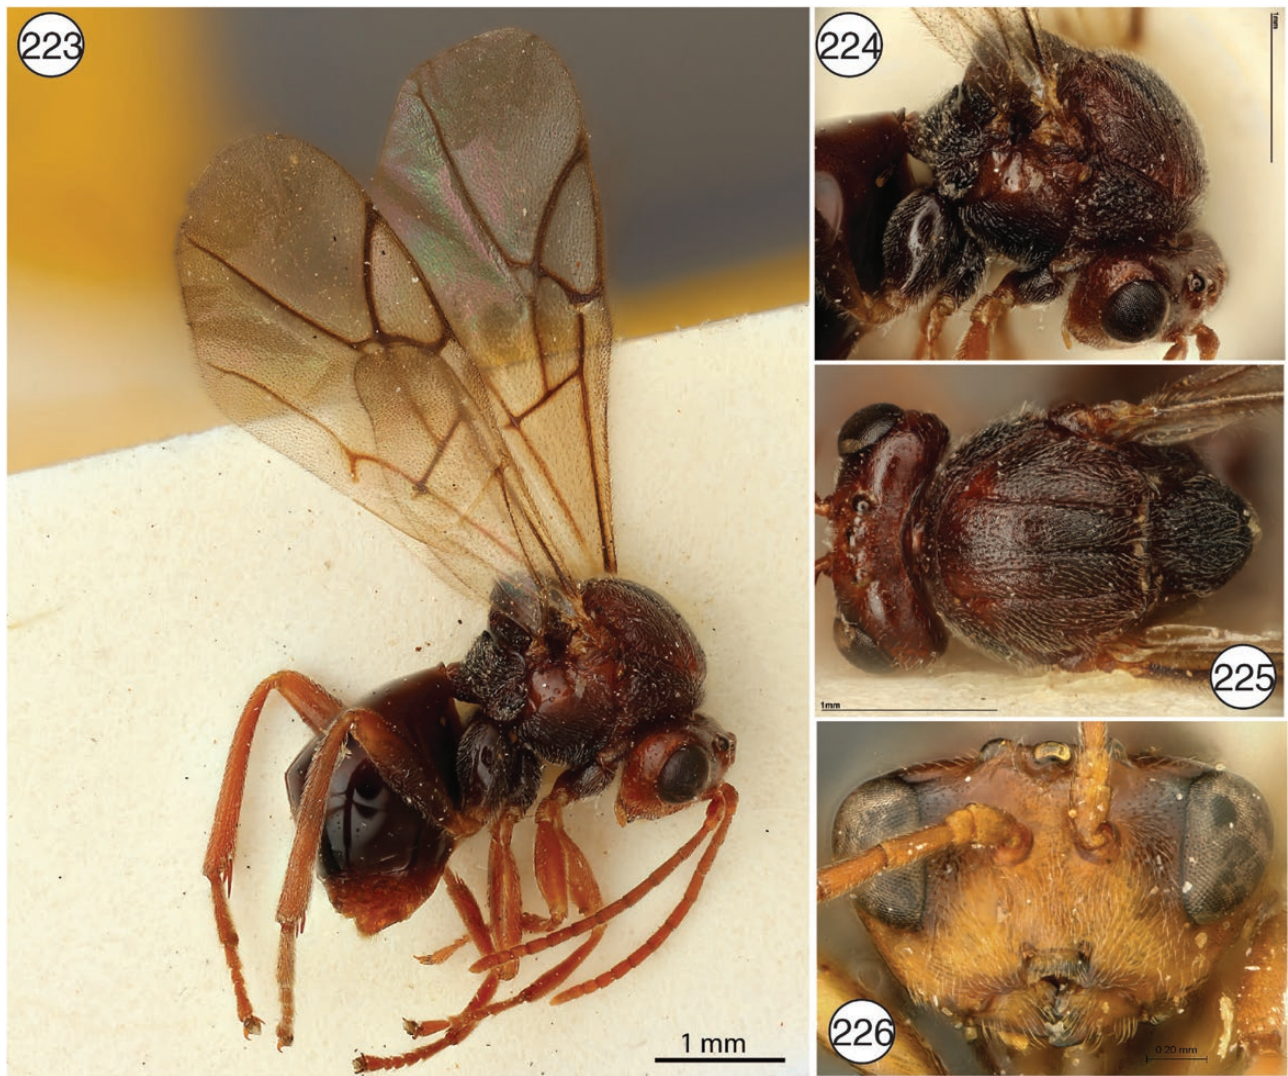

Plate 14. Qwaqwaiini. Figs. 223 through 226. *Qwaqwaia scolopiae*, SAMHYMP044067.

### Qwaqwaiini

#### Figs. 223–226

This unusual group is another example of a monotypic tribe in the Cynipinae. Species are gallers on *Scolopia* (Salicaceae) in South Africa. In fact, this tribe appears to be endemic to South Africa, where a single species galls *Scolopia mundii*, forming unilocular stem galls (Liljeblad et al. 2011).

Biology. Gall inducer on *Scolopia mundii* (Eckl. & Zeyh.) Warb. (Salicaceae), a tree in the eudicot subclass Rosidae (Liljeblad et al. 2011).

Distribution. South Africa: Kwazulu-Natal; Mpumalanga.

Relevant literature. Tribe and its only species recently described by Liljeblad et al. (2011); treated again in Ronquist et al. (2015).

Classification.

Qwaqwaiini Liljeblad, Nieves-Aldrey and Melika, 2011

*Qwaqwaia* Liljeblad, Nieves-Aldrey and Melika, 2011; 1 species AT



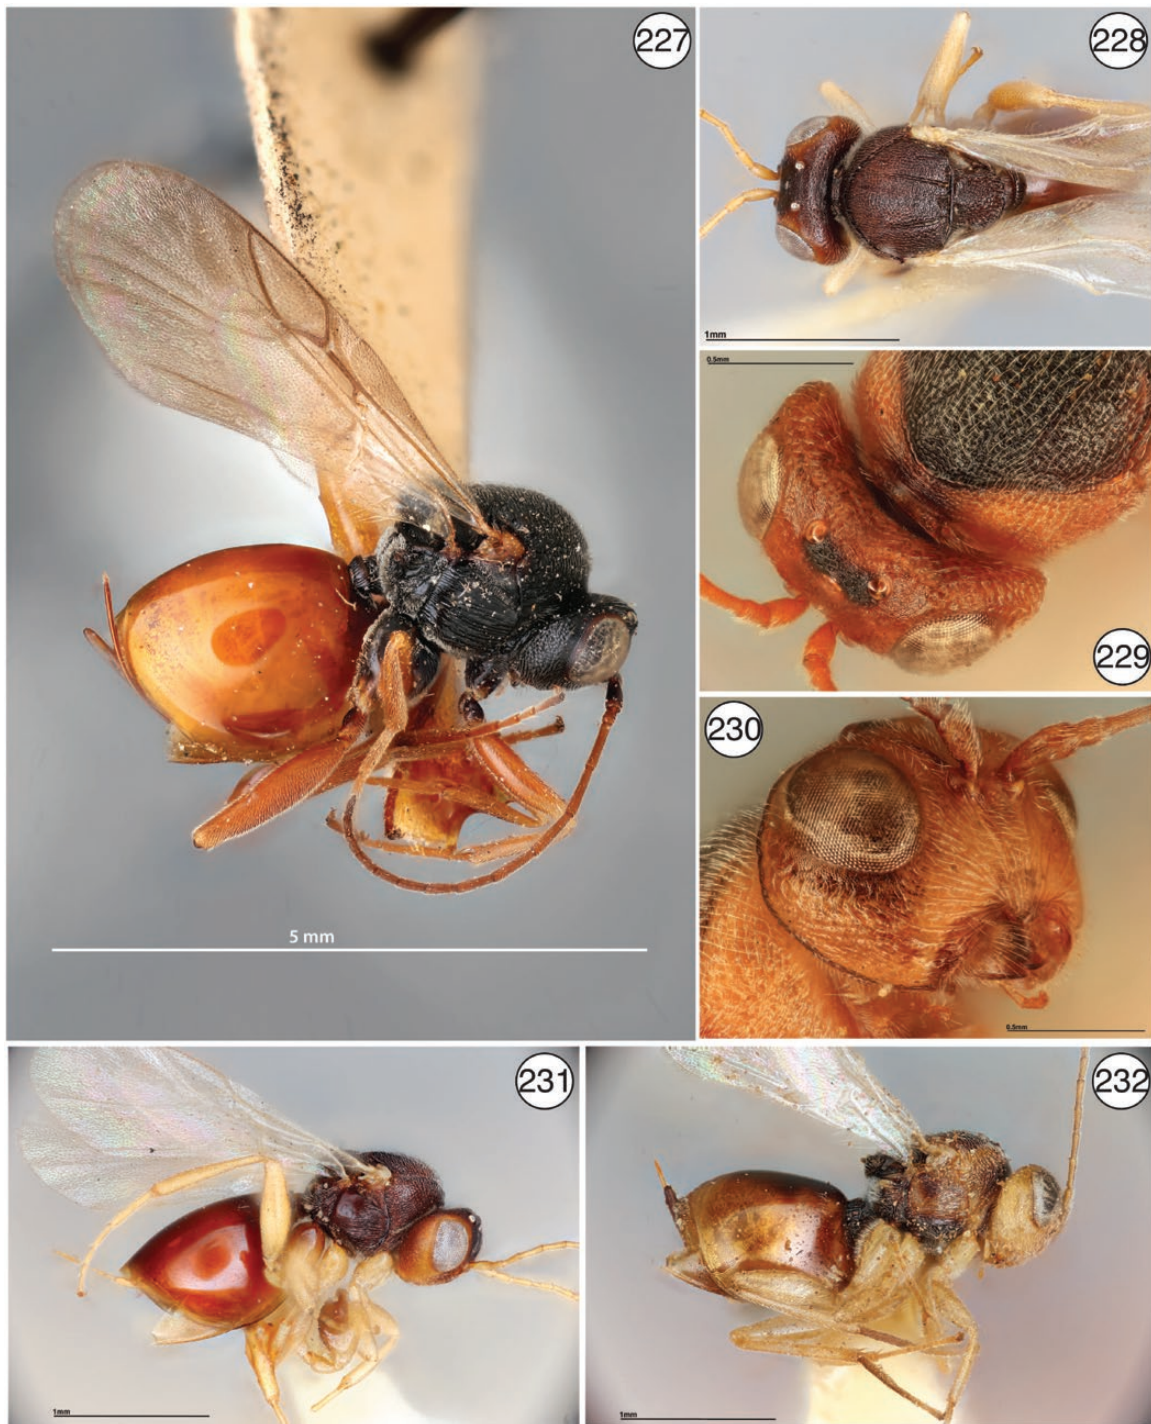

**Plate 15.** Synergini. Fig. 227, *Synergus distinctus* McCracken & Egbert, 1922, USNMENT01081301. Figs. 228 and 231, *Synergus incisus*, USNMENT01231859. Figs. 229, 230, and 232, *Synergus lignicola* Osten-Sacken, 1862. USNMENT01448497.

### Synergini

**Figs. 227–232**

The traditional composition of this tribe turned out to be polyphyletic, and included any cynipid that was known or presumed to be an inquiline. However, [Ronquist et al. \(2015\)](#) demonstrated that inquilinism has evolved numerous times, and as a result, some members of Synergini s.l. were moved to other tribes (see Ceroptresini, Diastrophini, above). *Synergus*

is readily identified by the presence of a syntergum on the metasoma, and is by far the most readily collected and speciose genus in the tribe.

**Biology.** Mainly inquilines of gall-inducing Cynipini on Fagaceae. In some cases, inquilinism reaches a degree where gall inducers do not survive and hatch. It was recently discovered that *Synergus itoensis* Abe, Ide & Wachi ([Abe et al. 2011](#)) is able to induce galls *de novo*. Further, this species is found alongside other undescribed species

closely allied to *S. itoensis* from Japan, which lead to Ide et al. (2018) arguing that the Synergini gall inducers have independently arisen from other inquiline.

*Rhoophilus* is wholly unique being an inquiline forming secondary cells in galls induced by *Scyrotis* moths (Cecidosidae) on *Searsia* (formerly *Rhus*) (Anacardiaceae) shrubs and trees. Larval cells expand into the hollow interior of the host gall resulting in death of the gall-inducing moth larva (van Noort et al. 2007).

Distribution. Mostly Holarctic, but single taxa present in all regions; *Rhoophilus* endemic to South Africa.

Relevant literature. Ronquist (1999) reviewed the data for and against the monophyly of Synergini s.l.; tribe recently treated in Ronquist et al. (2015). The term *agastoparasitism* coined in Ronquist (1994) to describe some inquiline biology. Van Noort et al. (2007) thoroughly studied *Rhoophilus loewi*. Péntzes et al. (2012) reviewed the world oak associated inquilines.

#### Classification.

##### Synergini

*Agastoroxenia* Nieves-Aldrey and Medianero, 2010; 1 species NT

*Lithosaphonecrus* Tang, Melika and Boszó, 2013; 9 species OR plus Papua New Guinea

*Rhoophilus* Mayr, 1881; 1 species South Africa

*Saphonecrus* Dalla Torre and Kieffer, 1910; 40 species but taxonomy is uncertain; PA, NA, OR

*Synergus* Hartig, 1840; 137 species but taxonomy is uncertain and far from stable with many more or less dubious taxa; PA, NA, NT

*Synophrus* Hartig, 1843; 7 species wPA

*Ufo* Melika and Pujade-Villar, 2005; 5 species ePA, OR

*Unplacable Nomina dubia* Poncyia Kieffer, 1903; 1 species

#### Figitidae

This family is the most speciose group within the Cynipoidea. Members of this family are, when biology is known, internal parasitoids of other holometabolous insects, and in at least one group, hyperparasitoids. Buffington et al. (2012) reviewed all the host records of the family and summarized the reliable host records. With some 157 genera and more than 1,700 species, subfamilies and tribes have been erected to bring some order to this diversity. In fact, it is typically easier to identify the lower groups of Figitidae than the family itself, and this is reflected in the key here. In terms of biology,

the subfamilies fall into three categories: some are parasitoids of muscomorphous Diptera (Eucoilinae, Figitinae); some are inquilines or parasitoids inside galls (Euceroptinae, Mikeiinae, Parnipinae, Plectocynipinae, Thrasorinae: all species-poor); some are parasitoids of various insects attacking aphids (Anacharitinae, Aspicerinae, Charipinae). Finally, hosts are unknown for Emargininae and Pycnostigminae.

#### Anacharitinae

Figs. 233–236

The moderately diverse anacharitines are often among the more easily recognizable wasps within the cynipoids. They tend to be elongate, with a subtriangular head (in anterior view). In fact, the head is frequently the widest part of the animal (when viewed dorsally). The narrow petiole, so characteristic of the common *Anacharis*, in conjunction with a very short ovipositor, is hypothesized to be an adaptation for ‘quick strike’ oviposition into predatory Neuroptera (Buffington 2007). The narrow petiole allows for maximum flexibility in directing the ovipositor tip; the short ovipositor requires the slightest insertion into the larval body to deposit an egg. Together, this allows the wasp to successfully oviposit before the host can mount a counter-attack. The limits of some genera are poorly circumscribed.

Biology. Primary parasitoids of aphidophagous Hemeroibiidae, and possibly Chrysopidae.

Distribution. Main genera are widespread but mostly Holarctic, while the Neotropical region has several endemic genera and the Afrotropics one (*Acanthaegilopsis*). *Anacharis* is the most widespread with at least one species common in Australia.

Relevant literature. The research group at the University of Barcelona (led by Juli Pujade-Villar) has been very active in this taxon. Ros-Farré et al. (2000) revised *Acanthaegilips* and characterized the aspicerines and anacharitines; Mata-Casanova et al. (2015a) revised *Xyalaspis*; other species-level treatments of *Aegilips* (Mata-Casanova et al. 2017; Mata-Casanova et al. 2019) and *Anacharis* (Mata-Casanova et al. 2015b); Restrepo-Ortiz and Pujade-Villar (2010) provide a key to genera of the world. Van Noort et al. (2015) reviewed the Afrotropical species of the subfamily. Buffington et al. (2007, 2012) provided phylogenetic data on the group.

#### Classification.

Anacharitinae Thomson, 1862

*Acanthaegilips* Ashmead, 1897; 17 species NT



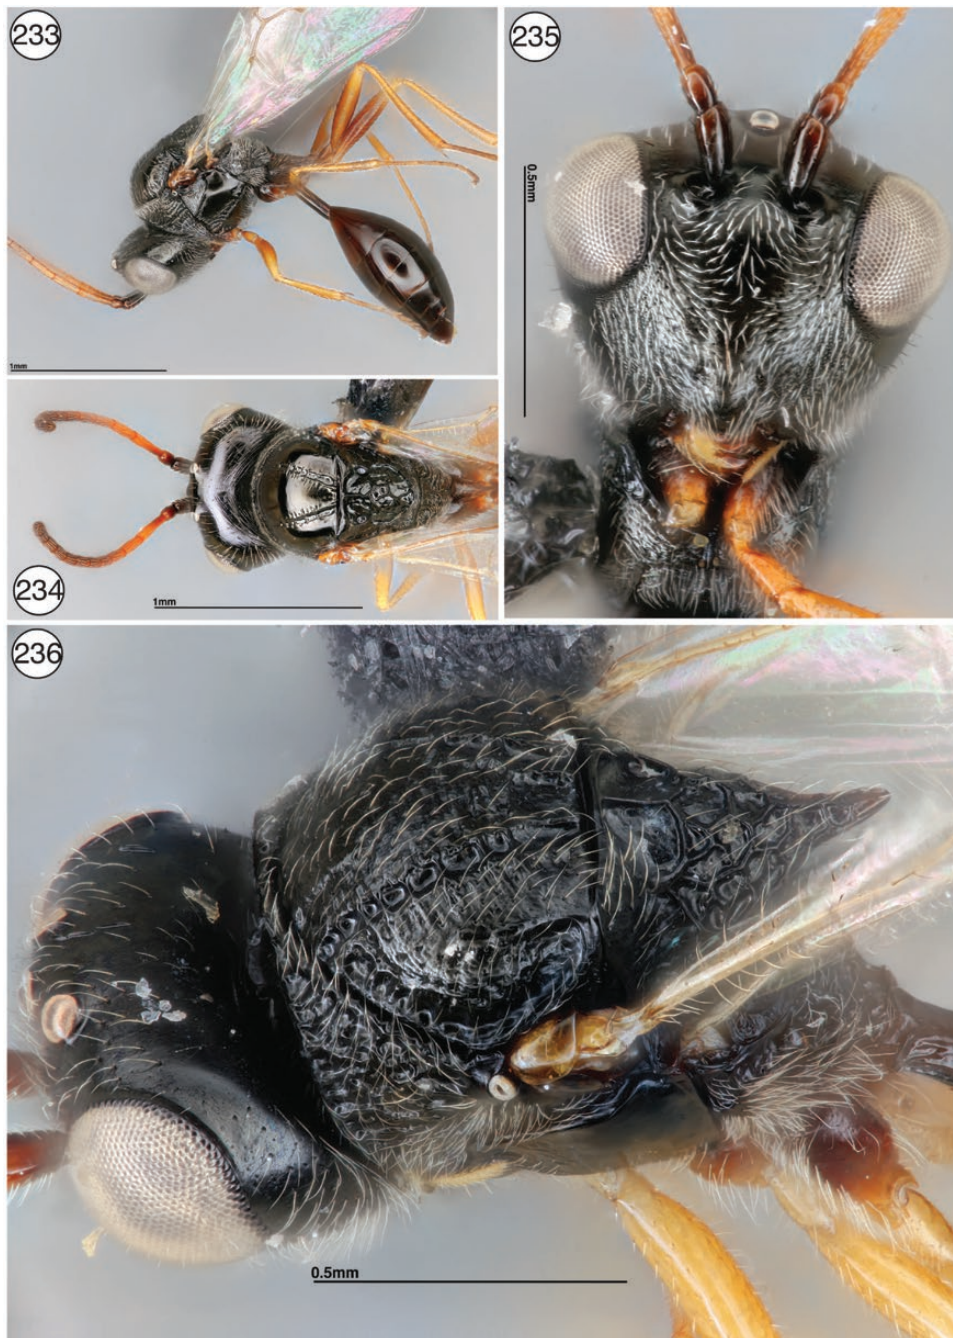

Plate 16. Anacharitinae. Fig. 233–235, *Anacharis melaneura*, USNMENT01231833. Fig. 236, *Xyalaspis flavipes*, USNMENT01231844.

*Acanthaegilopsis* Pujade-Villar, 2013; 2 species AT  
*Aegilips* Haliday, 1835; 30 species worldwide but mostly Holarctic  
*Anacharis* Dalman, 1823; 25 species worldwide but mostly Holarctic

*Calofigites* Kieffer, 1909; 2 species NT  
*Hexacharis* Kieffer, 1907; 1 species NA  
*Solenofigites* Díaz, 1979; 1 species NT  
*Xyalaspis* Hartig, 1843; 25 species worldwide but mostly Holarctic



## Aspicerinae

Figs. 237–242

With respect to general morphology, Aspicerinae are among the most spectacular of all figitids. They are typically stout with very little in the way of sexual dimorphism. While a majority of figitids are shiny black, several species of *Aspicera*, *Callaspidia* and *Anacharoides* are bright

orange to red in color. Their wings are glabrous and shimmer in the right light. Several genera, including *Aspicera*, *Prosaspicera*, and *Paraspicera* have well-developed scutellar spines. Most aspicerines have stout hind legs and an extremely petiolate metasoma. Like the anacharitines, aspicerines are quick-strike parasitoids, attacking syrphid larva that themselves provide a significant threat to the wasp during oviposition.

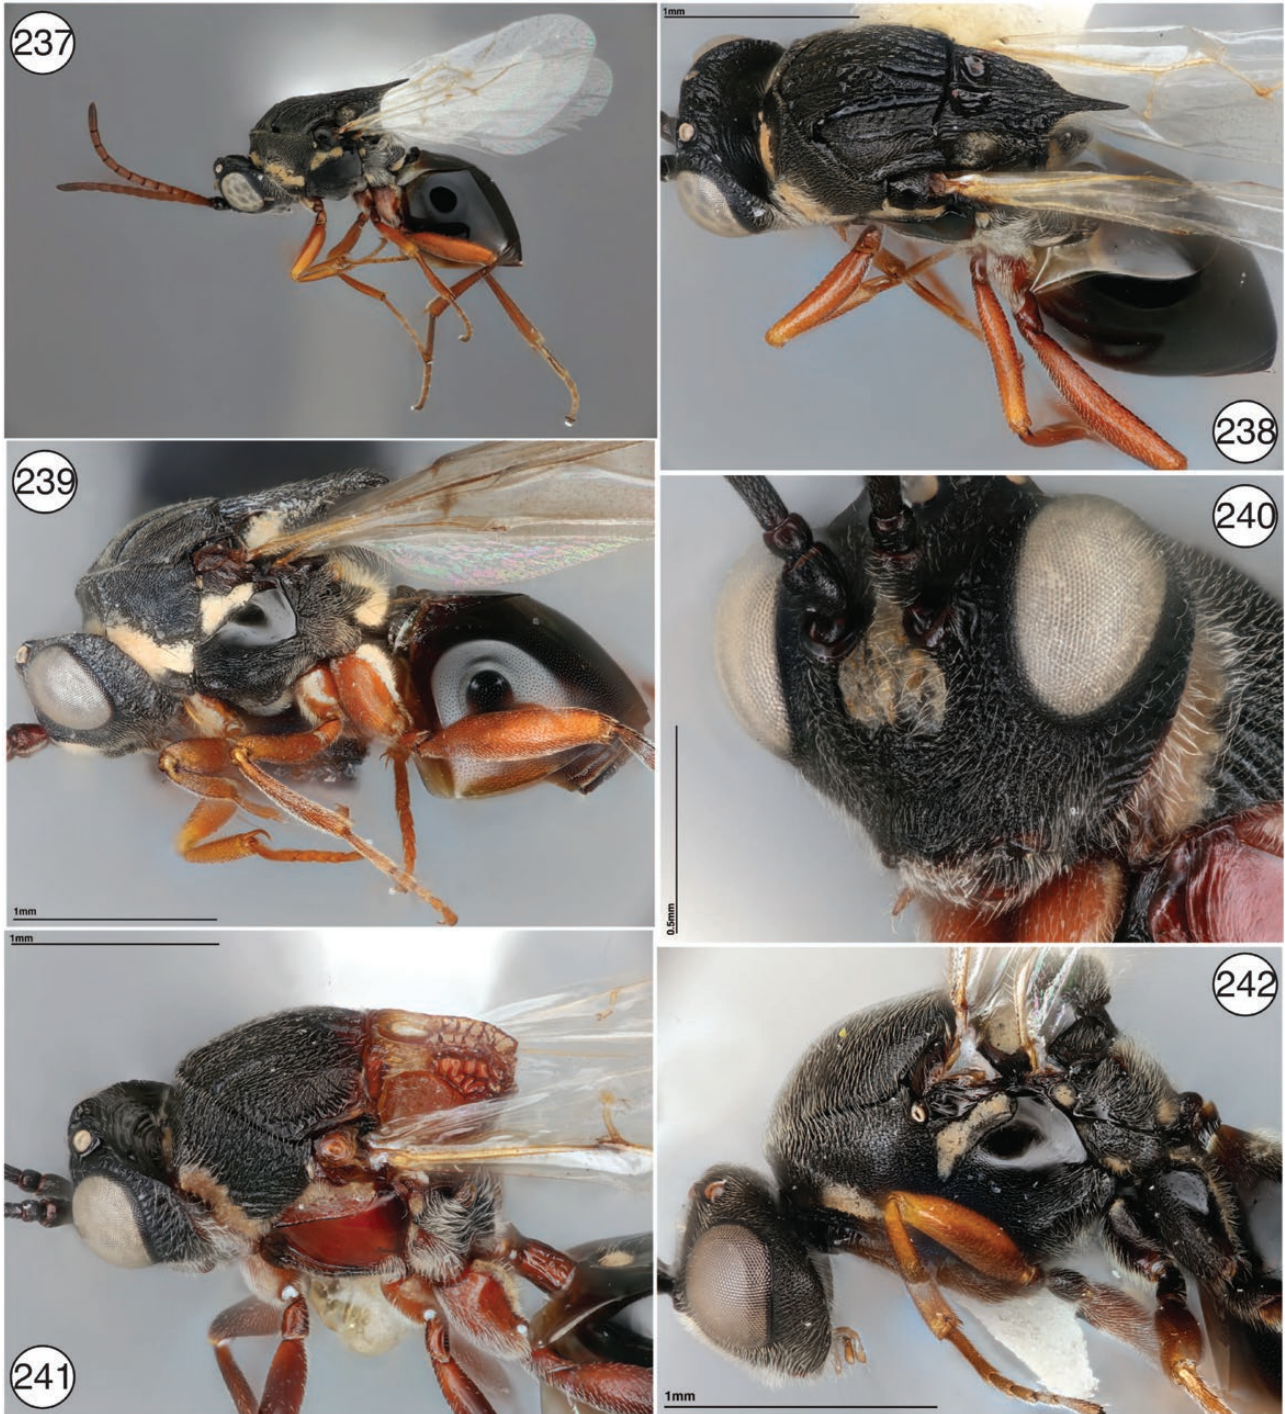

Plate 17. Aspicerinae. Figs. 237 and 238, *Aspicera hartigi*, USNMENT01231866. Fig. 239, *Prosaspicera* sp., USNMENT01231883. Figs. 240 and 241, *Callaspidia* sp., USNMENT01231867. Fig. 242, *Melanips* sp., USNMENT01231847.



A very short ovipositor, coupled with a highly flexible metasoma and strong hind legs, allow the wasp to attack the host before the host can mount a counter attack (Buffington 2007). *Melanips* is taxonomically problematic with respect to Figitinae and Aspicerinae. *Melanips* lacks morphological characters that can positively associate the genus with either subfamily; however, species of *Melanips* have been reared from Chamaemyiidae larvae predated on aphids, and this biology coincides with Aspicerinae. Further, Buffington et al. (2007, 2012) recovered *Melanips* as sister-group to the remaining Aspicerinae, and suggested moving *Melanips* to that subfamily. The group is currently being evaluated as its own subfamily (Mata-Casanova et al. personal communication). Despite recent revisions, several species remain undescribed and some regional faunas largely unexplored.

**Biology.** Koinobiont endoparasitoids of aphidophagous syrphid and chamaemyiid flies (summarized in Buffington et al. 2012).

**Distribution.** Mostly Holarctic; *Anacharoides* is indigenous to the Afrotropical Region and Northern Africa.

**Relevant literature.** Ros-Farré & Pujade-Villar revised *Prosaspicera* (2006), *Callaspidia* (2009a) *Paraspicera* (2011a), *Omalaspis* (2011b) and *Aspicera* (2013); Buffington and van Noort (2009) revised *Anacharoides*. Ros-Farré (2007) provides a key to genera.

**Classification.**

Aspicerinae Dalla Torre and Kieffer, 1910

*Anacharoides* Cameron, 1904; 7 species AT

*Aspicera* Dahlbom, 1842; 54 species Holarctic but also found in India

*Balna* Cameron, 1883; 6 species NT

*Callaspidia* Dahlbom, 1842; 8 species PA, NA, NT

*Melanips* Walker in Haliday, 1835; 31 species PA, NA, OR, NT, but the genus is poorly known and the number means very little

*Omalaspis* Giraud, 1860; 14 species PA, NA

*Paraspicera* Kieffer, 1907; 2 species NA

*Prosaspicera* Kieffer, 1907; 32 species worldwide except wPA and AU

*Pujadella* Ros-Farré, 2007; 2 species OR

## Charipinae

Figs. 243–248

This is an extremely diverse group known exclusively as hyperparasitoids in aphid and psyllid systems. While not particularly

diverse at the genus level, the species diversity in *Alloxysta* is remarkable, and it is possible numerous cryptic species complexes are present in the genus. The small size and smooth cuticle of charipines make them easily recognized at the subfamily level. While genera are relatively approachable with respect to identification, species limits are still being addressed, and in some cases, species-level identification is difficult if not impossible. The research group at the University of Barcelona (Pujade-Villar Lab) is the most active in the world and has produced the most recent research on the group, spearheaded by Mar Ferrer-Suay. The volume of papers and new taxa in recent years is remarkable, and has been particularly valuable in making the types accessible. Up to a point, nomenclatural issues, as well as distribution knowledge and practical identification have benefitted significantly from this. But this is not definitive since species circumscriptions are still often uncertain, as revisions have usually been made on the basis of rather small numbers of specimens and a set of preferred morphological characters, not considering biological or molecular evidence nor phylogenetic considerations. Particularly troublesome was the erection of all wingless forms into separate species.

**Biology.** Hyperparasitoids of aphidiine braconids and aphelinid chalcidoids through aphids and psyllids. Data summarized online at <http://www.charipinaedatabase.com>.

**Distribution.** Worldwide, but with the largest number of species in the Holarctic, while two unusual groups (*Dilapothor* and *Thoreauana*) are from Australia.

**Relevant literature.** Menke and Evenhuis (1991) provided the first modern update of the group. Ferrer-Suay et al. (2012) provided a world catalog, which has also been merged into an online database (Ferrer-Suay et al. 2014); Ferrer-Suay et al. (2013a) review Neotropical species, Oriental species (Ferrer-Suay et al. 2013b) and Palearctic species (Ferrer-Suay et al. 2018); van Noort et al. (2015) reviewed the Afrotropical species.

**Classification.**

Charipinae Dalla Torre and Kieffer, 1910

*Alloxysta* Förster; 137 species worldwide but mainly Holarctic, despite recent revisions many problems remain

*Apocharips* Fergusson, 1986; 6 species NT, PA, AT

*Dilapothor* Paretas-Martinez and Pujade-Villar, 2006; 1 species AU

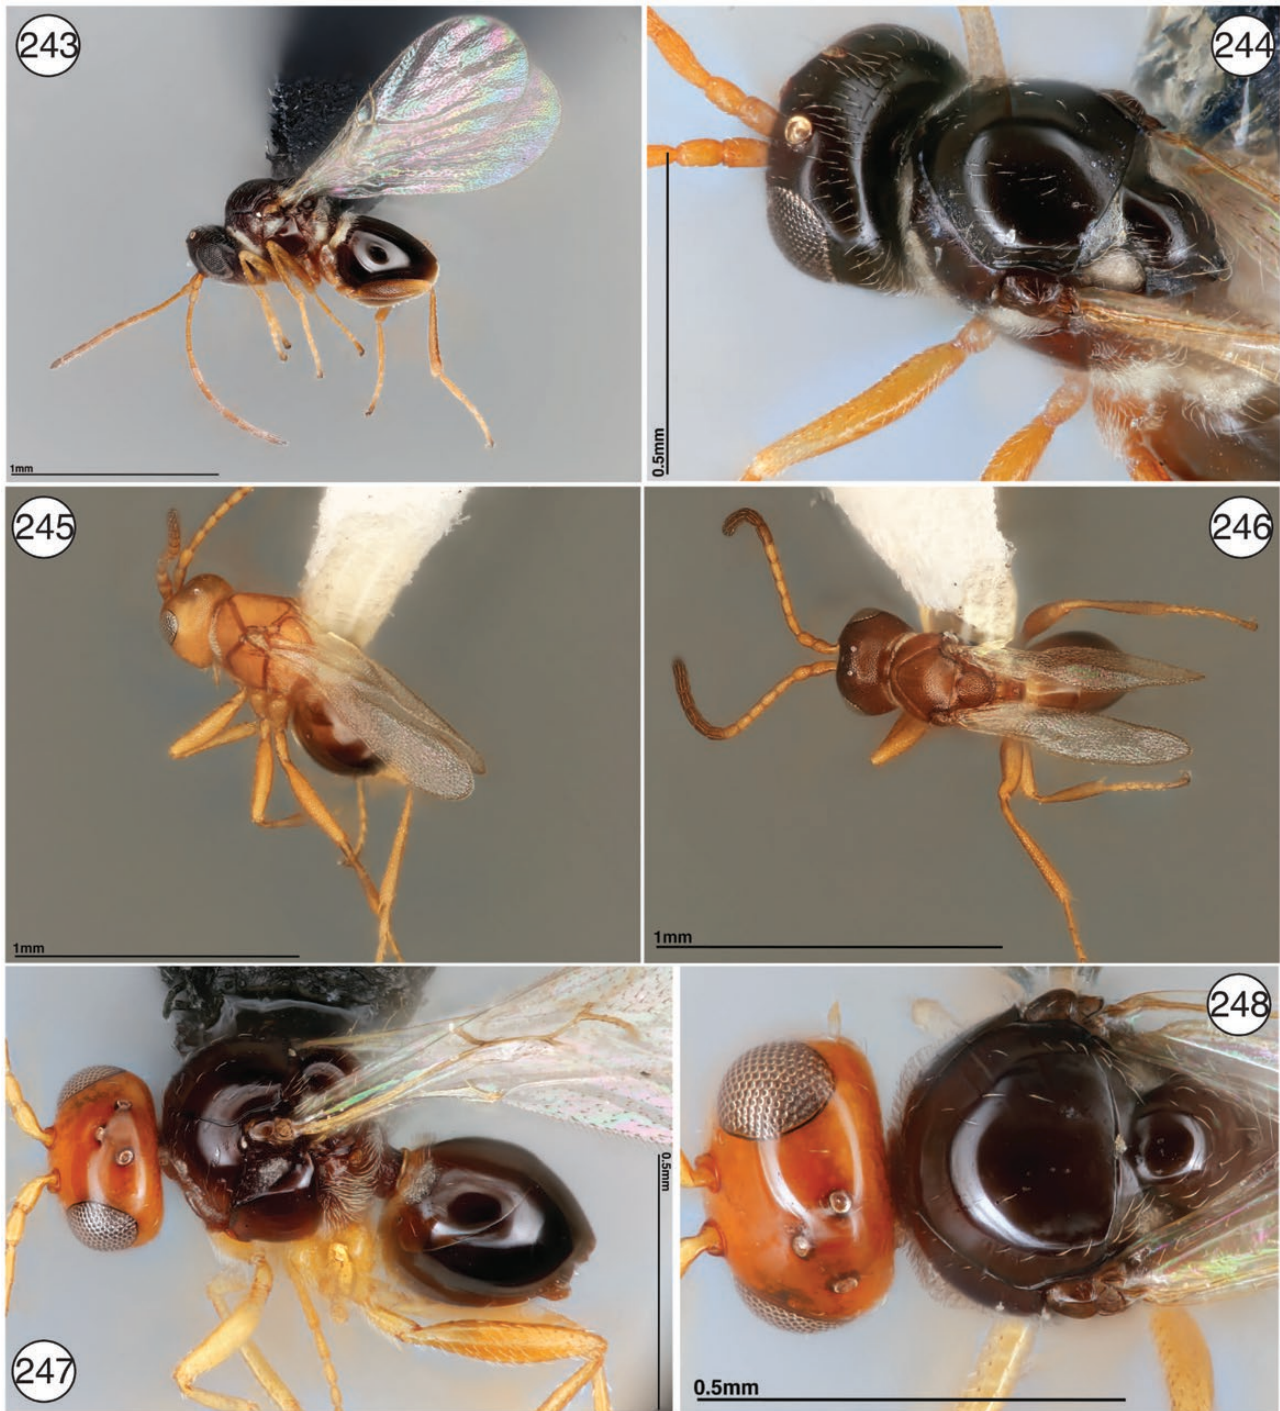

**Plate 18.** Charipinae. Figs. 243 and 244, *Apocharrips trapezoidea*, USNMENT01231873. Figs. 245 and 246, *Lytoxysta brevipalpis*, USNMENT01231836. Figs. 247 and 248, *Alloxyysta* sp., USNMENT01231840.

*Dilyta* Förster, 1869; 14 species AT, PA, NA, OR  
*Lobopterocharips* Paretas-Martinez and Pujade-Villar, 2008; 1 species OR  
*Lytoxysta* Kieffer, 1909; 1 species NA

*Phaenoglyphis* Förster, 1869; 44 species, worldwide but mainly Holarctic, despite recent revisions many problems remain  
*Thoreauana* Girault, 1930; 4 species AU



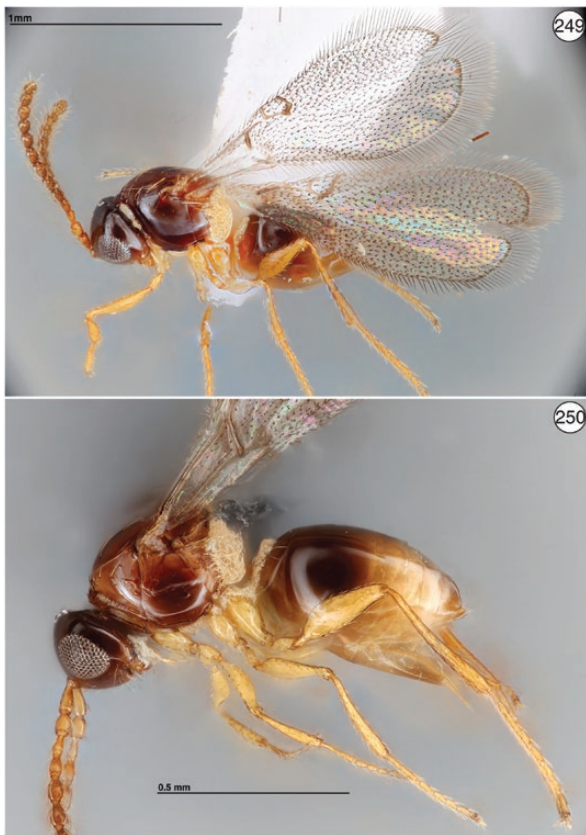

**Plate 19.** Emargininae. Fig. 249, *Thoreauella* sp., USNMMENT01022106. Fig. 250, *Thoreauella* sp., USNMMENT01525887.

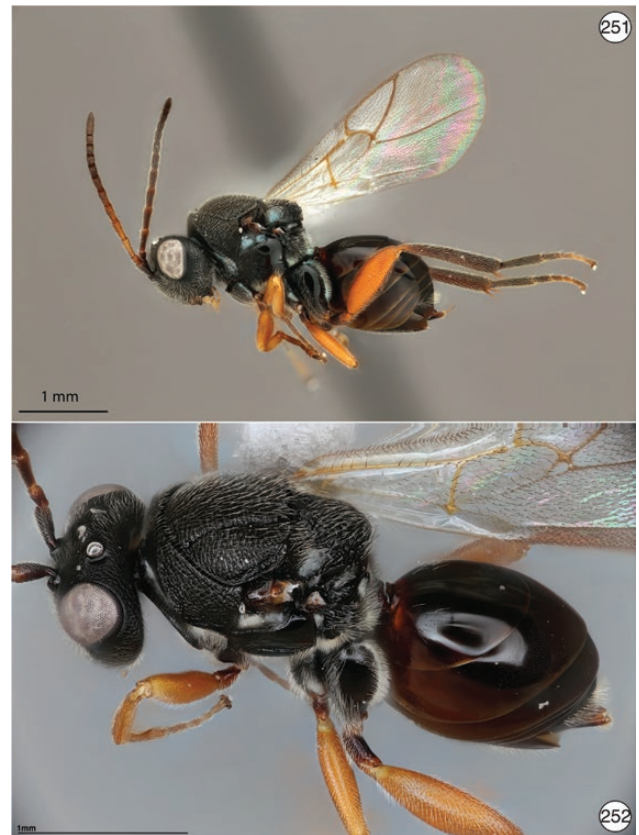

**Plate 20.** Euceroptinae. Figs. 251 and 252, *Euceroptres maritimus*, USNMMENT01231848.

### Emargininae

Figs. 249 and 250

This unusual group of diminutive wasps has been variously classified, often as eucoilines. Ronquist (1999) clarified the circumscription of the group and recognized them as their own subfamily (reviewed by Pujade-Villar 2019). While typically rare in most parts of the world, they are a dominant figitid group in Madagascar (van Noort et al. 2015). Several genera have been described, but all have been synonymized under *Thoreauella* Girault; considering that, nothing less than a world-wide revision would be able to find phylogenetically meaningful groups.

**Biology.** Host unknown, but adults have been collected from formicid refuse piles (Weld 1960b).

**Distribution.** Pantropical and transgressing into Eastern Palearctic, but rarely collected outside Madagascar.

**Relevant literature.** Ronquist (1999) circumscribed the group; Weld (1960b) suggested species are ant associates. Van Noort et al. (2015) reviewed the Afrotropical species and moved all species into *Thoreauella*.

**Classification.**

Emargininae Kovalev, 1994

*Thoreauella* Girault, 1930; 15 species pantropical ePAePA

### Euceroptinae

Figs. 251 and 252

This small group has been variously classified, most frequently as cynipids. Species are gall associates, presumably gall wasp parasitoids. Ronquist (1999) grouped them as members of the 'figitoid inquiline', but Buffington and Liljeblad (2008) revised the genus and recognized the group as a distinct subfamily; Buffington et al. (2007) phylogenetically recovered the group outside of the other gall-associated figitids.

**Biology.** Parasitoids or inquiline of *Andricus* spp. (Cynipini) on *Quercus* spp.

**Distribution.** Holarctic Region; mostly Nearctic, with one recent specimen seen from Serbia (Buffington, pers. obsv.)

**Relevant literature.** Ashmead (1896) described the genus; Buffington and Liljeblad (2008) revised the genus and described the subfamily.

**Classification.**

Euceroptinae Buffington and Liljeblad, 2008

*Euceroptres* Ashmead, 1896; 4 species NA

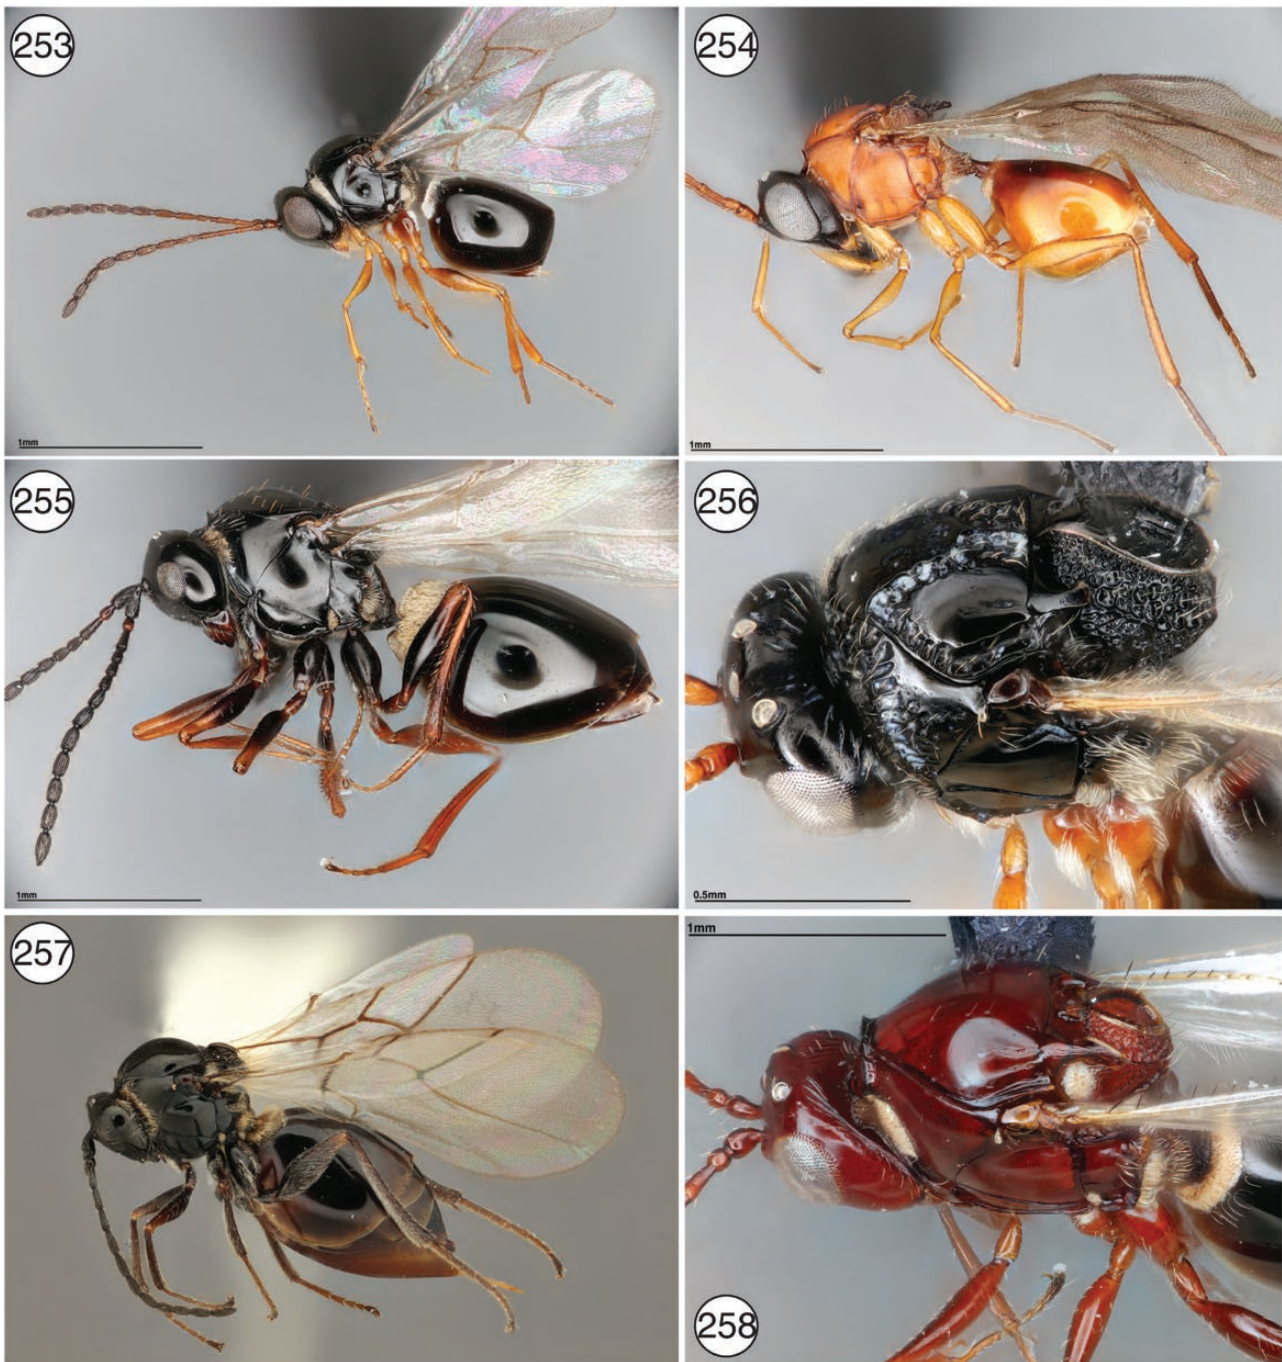

**Plate 21.** Eucoilinae. Fig. 253, *Ganaspis brasiliensis* (Ihering, 1905), USNMENT01520001. Fig. 254, *Odonteucoila* sp., USNMENT01231882. Fig. 255, *Kleidotoma* sp., USNMENT01525865. Fig. 256, *Gronotoma* sp., USNMENT01231843. Fig. 257, *Trybliographa melanopectera*, USNMENT01231838. Fig. 258, *Striatovortex* sp., USNMENT01231830.

## Eucoilinae

### Figs. 253–258

Within the Figitidae, the vast majority of both species diversity, and abundance, occurs within Eucoilinae. Eucoilines can be collected very easily on all continents (they are even found on Antarctic islands), and many species do very well in the suburban to urban environments, as well as around farms. Unlike most other cynipoids, the eucoilines are immediately recognizable by a single morphological feature: the scutellar plate. This feature is a structure holding up a glandular release pit the function of which is currently unknown. The feature is often referred to as a cup, a plate, a teardrop, or a disk. Because

of their commonness, and being immediately recognizable from all other cynipoids, many species have been more or less haphazardly described. As a result, this large group became an impenetrable taxonomic morass for decades until Nordlander's work in the late 70s and early 80s began to make some sense of the diversity. Nordlander (1982b) summarized his work and generated generic groups that remained relevant well into the 2000s. Fontal-Cazalla et al. (2002) ignited renewed interest in the phylogeny of the group, and set the stage for an expanded analysis at the core of Buffington et al. (2007). The resulting phylogenies and recognition of phylogenetically informative characters have helped motivate addressing the taxonomy of larger



groups of eucoilines, including the Diglyphosematini (Buffington 2011), Zaeucoilini (Buffington 2009) and Eucoilini (Forshage 2009). The most comprehensive regional treatment of the Eucoilinae was published by van Noort et al. (2015) and establishes a format for future projects on eucoilines at other regional scales. In order to make sense of the genera within the group, tribes have recently been established. However, this is very much a work in progress and many genera currently lack tribal placement.

In all regions, the majority of species remain undescribed, and the described species are very often in completely wrong genera (due to the mentioned earlier lack of knowledge of phylogenetically informative characters). The latter problem (but not the former) has been addressed and largely rectified for some regions (Europe, North America, the Afrotropics) but remains at large elsewhere (the Oriental, Oceanic, and Neotropical regions all have a majority of described species still misplaced).

Eucoilines are parasitoids of cyclorrhous flies (Buffington et al. 2012), with most host associations still unknown but spanning over a wide diversity of flies (Ronquist 1999, Buffington 2007, Buffington et al. 2012). *Drosophila* parasitoids in the genera *Ganaspis* and *Leptopilina* have been used in lab studies since the 1960s. Their biology has thus been studied in remarkable detail, and they are currently being considered for use in the biocontrol of *Drosophila suzukii* ("SWD"). Other eucoilines that have been used in the biological control of pest flies include: *Aganaspis* species on tephritids; *Trybliographa* species on onion maggot; *Banacuniculus*; and *Ganaspidium* species on leafminers.

**Biology.** Koinobiont endoparasitoids of cyclorrhous flies. Early instar maggots are parasitized; and then after the host fly forms a puparium, the wasp kills the host, and completes its own pupation within the host puparium. Abe (2009) documented *Gronotoma micromorpha* as an egg-larval parasitoid of *Liriomyza trifolii*; it is not known how widespread this type of biology is among Eucoilinae. Hosts are unknown for most species, and the records we have are very often anecdotal, but several preliminary patterns can be observed. First, that almost all reliable host records are indeed of muscomorph (cyclorrhous) flies; some exceptional records of *Kleidotoma* on Sciaridae appears to us to be correct, whereas numerous, unisolated host records from Mycetophilidae are probably all erroneous. Second, that probably at least half of the Eucoilinae species attack saprophagous flies in more or less ephemeral habitats (dung, carrion, compost, debris, fermenting fruit and mushrooms) whereas another good portion attack phytophagous flies (leaf miners etc.). Thus, Diglyphosematini and Zaeucoilini are mostly but not exclusively on leafmining Agromyzidae, while Kleidotomini and Eucoilini are mostly but not exclusively on various saprophagous flies. Third, a "rule of thumb" that has been used among workers in the group for decades is to expect any genus of Eucoiline wasp to attack one particular family of flies. This is not valid in any strict sense but a mere pragmatic guidance, but with our limited data it works in a large number of cases. Large eucoiline genera tend to include exceptions (host switches), and two large genera (*Kleidotoma* and *Hexacola*) are known to have a wide range of hosts. The fly families attracting the largest number of eucoiline genera are Drosophilidae and Agromyzidae. Very little is known about host specificity of individual eucoiline species.

**Distribution.** Worldwide. Particularly speciose in the Neotropical Region.

**Relevant literature.** Weld (1952) remained dominant until the publications of Nordlander established a new standard of thoroughness and phylogenetic thinking in eucoiline research (Nordlander, 1976, 1978, 1980, 1981, 1982a, summarized in Nordlander [1982b]). Van Lenteran

et al. (1998) and van Alphen et al. (1991) investigated biology and host use. Forshage and Nordlander (2008) provided basic circumscription of tribes and keyed western Palearctic genera, Buffington revised Diglyphosematini (Buffington 2011) and the new tribe Zaeucoilini (Buffington 2009). Forshage (2009) summarized global overview of the subfamily and especially Eucoilini. Van Noort et al. (2015) provided a substantial overview of the Afrotropical fauna, and Forshage et al. (2013) cataloged Nearctic taxa. A combination of the Afrotropical key and the European key (Van Noort et al. 2015 and Forshage and Nordlander 2008) will allow generic recognition of most Eucoilinae worldwide, except in the utterly diverse Neotropics (cf Buffington et al. 2006) and highly aberrant Pacific islands (cf Beardsley 1989). Species-level identification is very often not possible, but many common European species can still be keyed with Quinlan (1978) even though taxonomy is obsolete, and odd taxa globally can be recognized using Weld (1952). Useful generic treatments are available for *Ganaspidium* (Buffington 2010a), *Banacuniculus* (Buffington 2010b), *Zaeucoila* (Buffington et al. 2018), European *Rhoptomeres* (Nordlander 1978, Costa Baião and Forshage 2018), *Leptopilina* in different regions (Nordlander 1980, Allemand et al. 2002, Novkovic et al. 2011, Lue et al. 2016), and several genera in Taiwan (Lin 1987, 1988), as well as for several lesser, recently described genera or regional assemblies thereof, while many recent studies still await publication. Fontal-Cazalla et al. (2002) and Buffington et al. (2007) provided phylogenies.

**Classification.**

Eucoilinae Thomson, 1862

Diglyphosematini Belizin, 1961

*Afrostilba* Benoit, 1956; 18 species AT  
*Banacuniculus* Buffington, 2010; 8 species NA, NT plus Hawaii  
*Diglyphosema* Förster, 1869; 7 species PA  
*Disorygma* Förster, 1869; 7 species PA, OR  
*Ealata* Quinlan, 1986; 5 species AT, OR  
*Ganaspidium* Weld, 1955; 6 species NA, NT, AT but mainly arid North American Southwest  
*Gronotoma* Förster, 1869; currently 35 species but a few more described species belong here, worldwide  
*Microstilba* Förster, 1869; 6 species, wPA  
*Nordlanderia* Quinlan, 1986; 4 species AT, PA  
*Paradiglyphosema* Lin, 1988; 3 species but at least 1 more described and some undescribed belong here, mostly OR but also AT  
*Sinatra* Buffington, 2011; 1 species around the Pacific  
*Tobiasiana* Kovalev, 1979; 4 species arid southern Palearctic

Eucoilini Thomson, 1862

*Afrodontaspis* Weld, 1962; 2 species AT  
*Bothrochacis* Cameron, 1904; 8 species currently in genus but a few more belong here, mostly AT but also OR and Hawaii  
*Eucoila* Westwood, 1833; only 3 described species currently are classified as *Eucoila* in a meaningful sense, while many need to be removed elsewhere and yet a few others need to be moved in or described as new, PA, NAPA, NA  
*Leptopilina* Förster, 1869; 41 described species currently in the genus in a meaningful sense but more are currently being described and still ca 12 need to be moved in from other genera, worldwide  
*Linaspis* Lin, 1988; 1 species ePA  
*Linoeucoila* Lin, 1988; 11 species, OR but undescribed species also AT

*Maacynips* Yoshimoto, 1963; 3 described species and numerous undescribed in Australia and throughout the Pacific and East Asia

*Quasimodoana* Forshage, Nordlander & Ronquist, 2008; 2 species PA, NA

*Trybliographa* Förster, 1869; 43 described species currently in the genus in a meaningful sense but some 20 more need to be moved in from other genera and far more described as new, worldwide but mainly Holarctic

#### Ganaspini Belizin, 1961

*Acantheucoela* Ashmead, 1900; 6 species NT

*Aganaspis* Lin, 1987; 7 described species currently in the genus in a meaningful sense but ca 10 more need to be moved in and more described as new; worldwide but mainly Oriental and Neotropic

*Areaaspis* Lin, 1988; 2 species but 2 more need to be moved in and additional ones described as new, OR, AT

*Aspidogyrus* Yoshimoto, 1962; 4 species Hawaii

*Caleucoela* Kieffer, 1909; 1 species NT

*Chrestosema* Förster, 1869; 3 described species currently in the genus in a meaningful sense but more will soon be moved in, and described as new, while remaining others will be moved out; mainly OR, PA

*Coneucoela* Kieffer, 1909; 1 species NT

*Didyctium* Riley, 1879; 12 described species currently in the genus in a meaningful sense but ca 10 need to be moved in and many more described as new; worldwide

*Dieucoela* Ashmead, 1903; 7 described species currently in the genus in a meaningful sense but ca 10 need to be moved in and more described as new; NT, NA

*Discaspis* Lin, 1988; 1 species OR

*Ditanyomeria* Yoshimoto, 1963; 4 nominal species AU, to be synonymized

*Endecameris* Yoshimoto, 1963; currently 2 species but many undescribed, PA, OR, AT, AU

*Epicoela* Borgmeier, 1935; 2 species NT

*Epochresta* Lin, 1988; 1 species OR

*Euxestophaga* Gallardo, 2017; 1 species NT

*Fontaliella* Pujade-Villar, 2013; 1 species NT

*Ganaspis* Förster, 1869; 25 described species currently in the genus in a meaningful sense, but ca. 40 more need to be moved in and yet more described as new; worldwide

*Gastraspis* Lin, 1988; 2 species OR, AT

*Glauraspida* Thomson, 1862; 3 described species currently in the genus in a meaningful sense, but a few more are being moved in or described as new; PA, rare in NA, NT

*Hexacola* Förster, 1869; 43 described species currently in the genus in a meaningful sense but ca 25 more need to be moved in and many more described as new; worldwide

*Humboldtiera* Buffington 2017; 4 species NT

*Hydrelliaeucoela* Díaz & Gallardo, 2009; 1 species NT

*Hypodiranchis* Ashmead, 1901; 9 described species currently in the genus in a meaningful sense but a few more need to be moved in or described as new: Pacific and East Asian

*Lispothyreus* Yoshimoto, 1962; 2 species Hawaii

*Mirandicola* Belizin, 1968; 8 described species currently in the genus in a meaningful sense but some more are currently being described and many remain undescribed, OR, PA

*Nesodiranchis* Perkins, 1910; 6 species Hawaii

*Nordlandiella* Díaz, 1982; 2 species but 3 more need to be moved in and some described as new; NT, NA

*Odonteucoila* Ashmead, 1903; 8 species NT

*Odontosema* Kieffer, 1909; 1 species NT

*Paraganaspis* Díaz & Gallardo, 1996; 2 species but 6 more need to be moved in and some described as new; NT, NA

*Pentamerocera* Ashmead, 1896; 1 species but very poorly known; NT

*Perischus* Weld, 1931; 2 species NT

*Promiomera* Ashmead, 1903; 1 species NT

*Pressia* Belizin, 1968; 1 nominal species PA, to be synonymized

*Pseudodiranchis* Yoshimoto, 1962; 10 nominal species, but poorly known, real species number might be smaller or larger; Hawaii

*Sinochresta* Lin, 1988; 2 species OR

*Steleucoela* Kieffer, 1908; 2 species NT

*Striatovertex* Schick, Forshage & Nordlander, 2011; 13 species but some are synonyms NT, NA and Hawaii

*Trissodontaspis* Ashmead, 1903; 1 species NT

*Weldia* Yoshimoto, 1962; 6 species, but poorly known, real species number might be smaller or larger; Hawaii

*Zamischus* Ashmead, 1903; 3 species NT

#### Kleidotomini Hellén, 1960

*Cothonaspis* Hartig, 1840; 7 species, mainly Holarctic and AT, as well as a cosmopolitan species

*Eutrias* Förster, 1869; 1 species, Holarctic

*Garudella* Buffington & Forshage, 2014; 4 species, OR, AT

*Kleidotoma* Westwood, 1833; 137 species worldwide, but by far most are still undescribed

*Muhaka* Buffington & Copeland, 2015; 1 species AT

*Triplasta* Kieffer, 1901; 4 species NT

#### Trichoplastini Kovalev, 1989

*Angustocorpa* Quinlan, 1988; 4 species AT

*Nanoctulhu* Buffington, 2012; 1 species AT

*Nordlanderiana* Kovalev, 1989; 1 species PA

*Rhoptromeris* Förster, 1869; 46 described species currently in the genus in a meaningful sense, but ca. 10 more need to be moved in and several more described as new, worldwide but mainly AT & PA

*Stentoriceps* Quinlan, 1984; 6 species AT

*Trichoplasta* Benoit, 1956; 27 described species currently in the genus in a meaningful sense, but a few need to be moved in and several more described as new, worldwide but mainly AT, PA, NA

#### Zaeucoilini Buffington, 2009

*Dettmeria* Borgmeier, 1935; 2 species NT

*Dicerataspis* Ashmead, 1896; 2 species NT

*Lopheucoila* Weld, 1951; 2 species NT

*Marthiella* Buffington, 2009; 2 species NT

*Moneucoela* Kieffer, 1907; 2 species NT

*Moritiella* Buffington, 2006; 2 species NT

*Paradettmeria* Gallardo & Díaz, 2011; 1 species NT

*Penteucoila* Weld, 1951; 1 species NT

*Preseucoela* Buffington, 2004; 3 species NT, NA

*Rhabdeucoela* Kieffer, 1907; 7 species NT

*Tropideucoila* Ashmead, 1903; 9 species NT

*Zaeucoila* Ashmead, 1903; 14 species NT, NA

'*Leptolamina* group', not currently assigned to a tribe



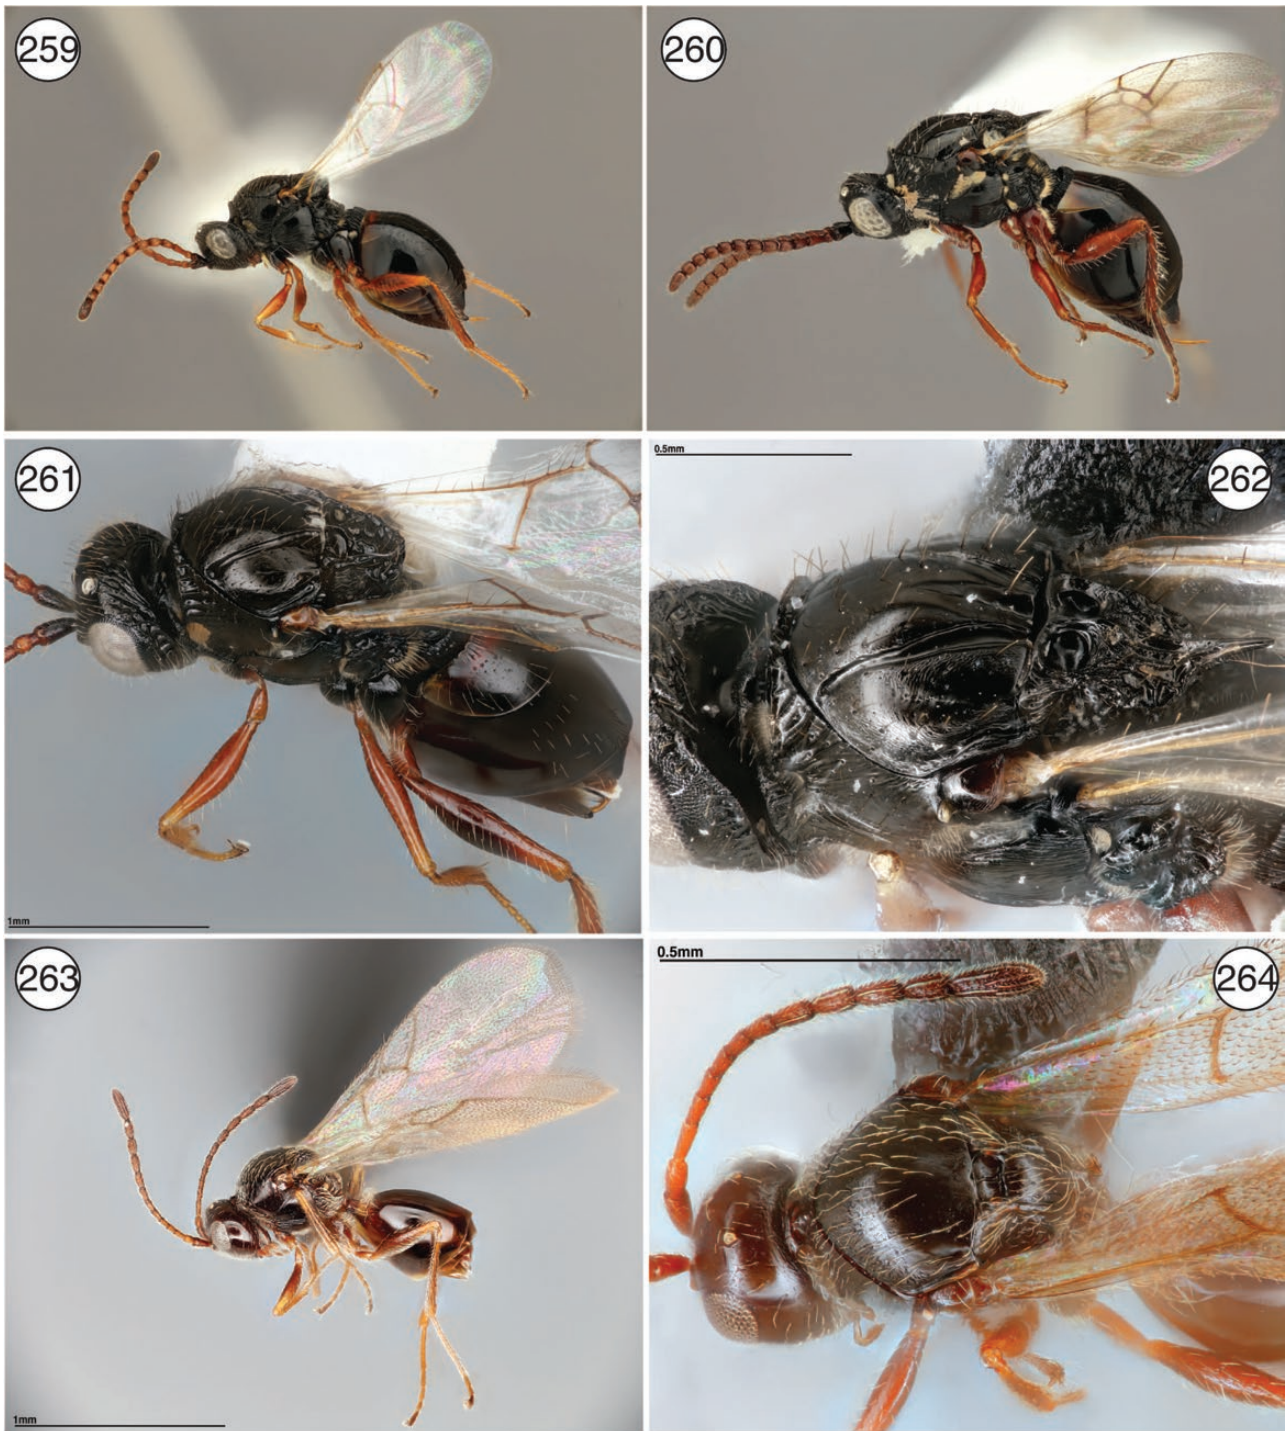

**Plate 22.** Figitinae. Figs. 259 and 261, *Figites* sp., USNMENT01231842. Fig. 260, *Neralsia* sp., USNMENT01231881. Fig. 262, *Neralsia* sp., USNMENT01231869. Figs. 263 and 264, *Lonchidia* sp., USNMENT01525866.

*Leptolamina* Yoshimoto; 16 species and more undescribed; OR, AU, AT, PA

*Micreriodes* Yoshimoto, 1962; 1 species currently in genus, a few need to be moved in and some more described as new; mainly PA, OR, AU but single specimens found in AT, NA

Unplaced *Nomina inquirenda*

*Delomeris* Diaz & Gallardo, 1996; 1 species NT

Unplacable *Nomina dubia*

*Macrocerucoila* Ashmead, 1887; 1 species

*Tetraplasta* Ashmead, 1903; 1 species

**Figitinae**

**Figs. 259–264**

No subfamily within Figitidae has been taxonomically abused as much as Figitinae. Historically, cynipoids that were clearly not

gall wasps, but also not recognizably eucoilines, anacharitines, or aspicerines, have been placed here. Hence, Figitinae has been a classic 'dustbin' concept. The phylogenetic research started by Ronquist (1999), and carried on by Buffington et al. (2007), recovered a core group of 'obvious' figitine genera (*vis. Neralsia, Xyalophora, Figites*), demonstrating that at least at a basic level, the group may be monophyletic. These core genera are some of the largest of all species of figitids, and are typically glabrous except for some stout setae, also having glabrous wings (apparently an adaptation to their often sticky host habitats, i.e., dung and carcasses). More peripheral genera, such as *Melanips* and *Lonchidia*, have been much more difficult to confine to Figitinae; this is reflected in this very paper, where these two taxa come out at the end of the figitid key to groups. Some figitines can be quite common, especially in Malaise traps and in sweepnet samples of pastureland.

**Biology.** Figitinae are parasitoids of muscomorphan Diptera, but for most taxa there are no known host associations. The available records show a similar pattern as in Eucoilinae, a dominance for attacking saprophagous flies in ephemeral habitats (dung, carrion, compost), but several attacking phytophagous flies. The species-rich and more common genera are all focused on large, quick-developing calyptate flies, while some notable forms parasitize, i.e., Anthomyiidae in conifer cones. While they have been included in surveys for natural enemies of species such as horn fly and face fly (Muscidae) in the United States, the parasitism rate has been too low for actual impact. Similarly, in Europe and Asia, *Amphitectus* (under very varying names) have been studied searching for natural enemies of cone seed predators, but no practical application has been developed.

**Distribution.** Worldwide. Some species of *Neralsia* and *Xyalophora* move with muscoid flies associated with livestock.

**Relevant literature.** Van Noort et al. (2014) revised the Afrotropical members of the subfamily. Paretas-Martínez and Pujade-Villar (2010) reviewed the Australian species; Pujade-Villar et al. (2008) reviewed the species limits of *Xyalophoroides quinquelineata*; Jiménez et al. (2008d) revised *Xyalophora* and Jiménez et al. (2008a, 2008b, 2008c) North American *Neralsia*. Forshage and Nordlander (2018) clarified the circumscription and biology of the *Amphitectus* group. Buffington et al. (2007, 2012) investigated the phylogeny of the group.

#### Classification.

Figitinae Hartig, 1840

##### *Figites* group

- Figites* Latreille, 1802; 54 species, but taxonomy is uncertain with many more or less dubious taxa, probably worldwide
- Foersterhomorus* Pujade-Villar, Petersen-Silva & Paretas-Martínez, 2011; 1 species PA
- Neralsia* Cameron, 1883; 61 species worldwide but most species NT
- Paraschiza* Weld, 1944; 1 species NA
- Trischiza* Förster, 1869; 5 species PA, NA
- Xyalophora* Kieffer, 1901; 14 species worldwide but not yet reported from the Oriental region

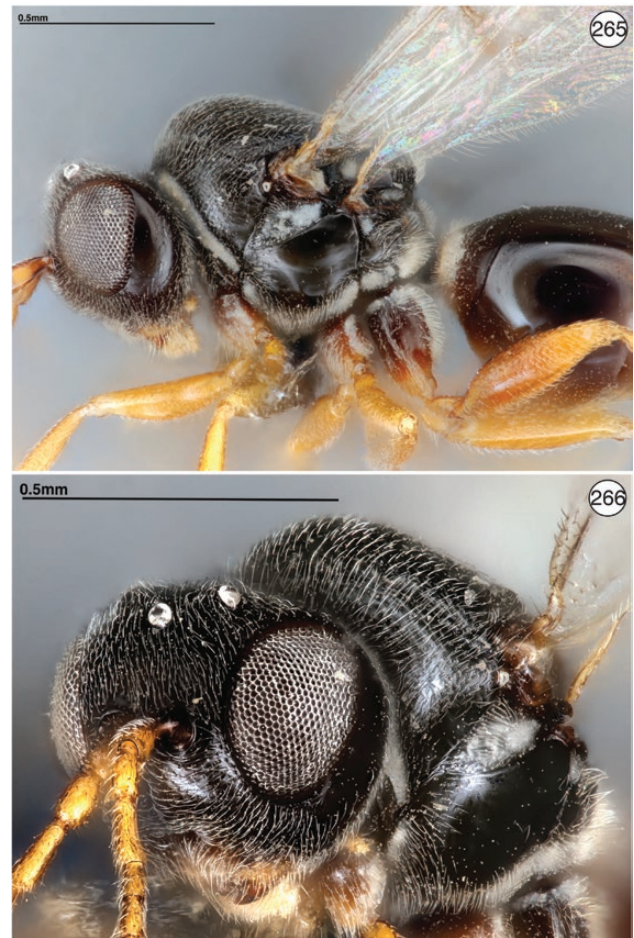

Plate 23. Mikeiinae. Figs. 265–266, *Mikeius hartigi*, USNMNT01231871.

*Xyalophoroides* Jiménez and Pujade-Villar, 2008; 1 species NA  
*Zygois* Förster, 1869; 2 species PA

##### *Lonchidia* group

*Lonchidia* Thomson, 1862; 7 species PA, NA, rare AT

##### *Sarothrus* group

*Amphitectus* Hartig, 1840; 2 species PA, NA, several undescribed  
*Sarothrioides* Belizin, 1961; 1 species ePA  
*Sarothrus* Hartig, 1840; 8 species PA, NA  
 placement uncertain  
*Ferpereira* Pujade-Villar, 2012; 1 species NT  
*Nebulovena* Pujade-Villar and Paretas-Martínez, 2012; 1 species PA

#### Mikeiinae

Figs. 265 and 266

This small subfamily contains some unusual figitid species endemic to Australia. *Mikeius* was originally placed within Thrasorinae, a



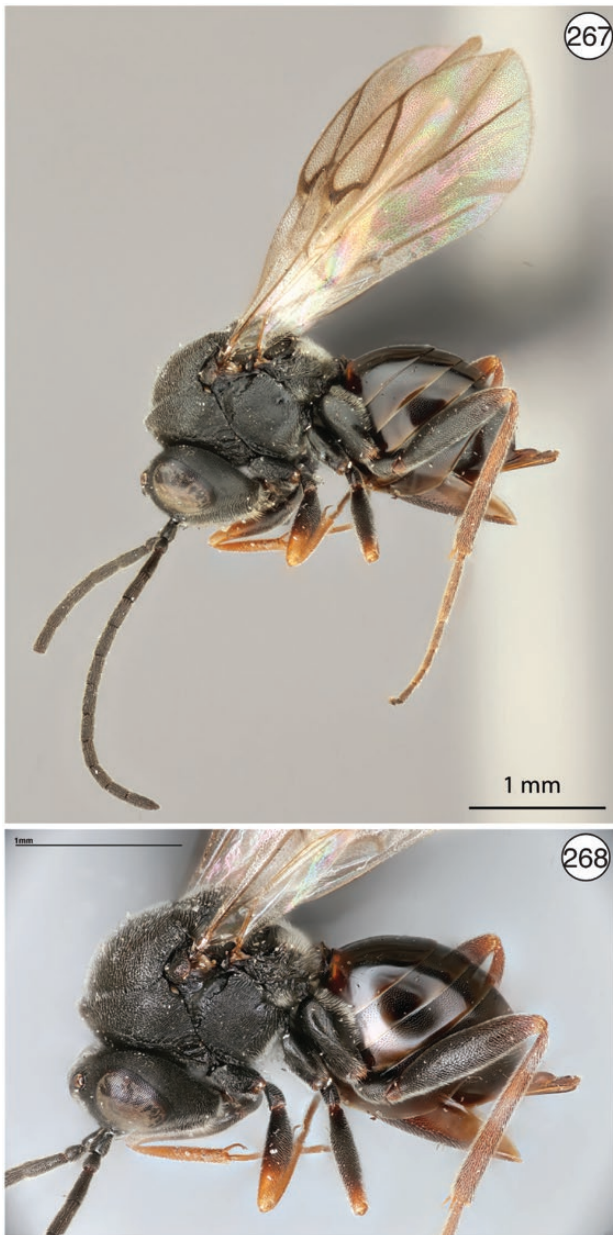

Plate 24. Parnipinae. Figs. 267–268, *Parnips nigripes*, USNMENT01231874.

subfamily containing *Thrasorus*, another gall-associated figitid from Australia. Following a phylogenetic analysis, [Paretas-Martinez et al. \(2011\)](#) removed *Mikeius* from Thrasorinae and placed it in its own subfamily, Mikeiinae. Very rare in collections, but large numbers can be reared from *Ophelimus* (Eulophidae) infested *Eucalyptus* trees in Australia.

Biology. Primary parasitoid of *Ophelimus* spp. (Eulophidae: Chalcidoidea) on *Eucalyptus* spp.

Distribution. Australia.

Relevant literature. *Mikeius* described by [Buffington \(2008\)](#); Mikeiinae by [Paretas-Martinez et al. \(2011\)](#). Phylogeny of the group by [Buffington et al. \(2012\)](#).

Classification.

Mikeiinae [Paretas-Martinez and Pujade-Villar, 2011](#)

*Mikeius* [Buffington, 2008](#); 5 species AU

### Parnipinae

[Figs. 267 and 268](#)

This monotypic subfamily has been the focus of a great deal of research on the evolution of Figitidae and Cynipidae. Originally classified as a cynipid, *Parnips* was later elevated to its own subfamily of Figitidae, and has been hypothesized as being the sister-group to the rest of Figitidae ([Ronquist and Nieves-Aldrey 2001](#); [Buffington et al. 2007](#)). This unusual genus are parasitoids of gall wasps (Aylacini) in *Papaver* (Papaveraceae) flowers in the Mediterranean. While usually rare in collections, *Parnips* can be readily obtained from *Barbotimia*-infested *Papaver* flowers.

Biology. Primary parasitoid of Aylacine gall wasps in *Papaver*.

Distribution. Palearctic Region; Mediterranean.

Relevant literature. [Ronquist and Nieves-Aldrey \(2001\)](#) described the subfamily; [Buffington et al. \(2007, 2012\)](#) provided phylogenetic data. [Ronquist et al. \(2018\)](#) summarized and added new knowledge.

Classification.

Parnipinae [Ronquist and Nieves-Aldrey, 2001](#)

*Parnips* [Ronquist and Nieves-Aldrey, 2001](#); 1 species described from the Mediterranean, 1 undescribed known.

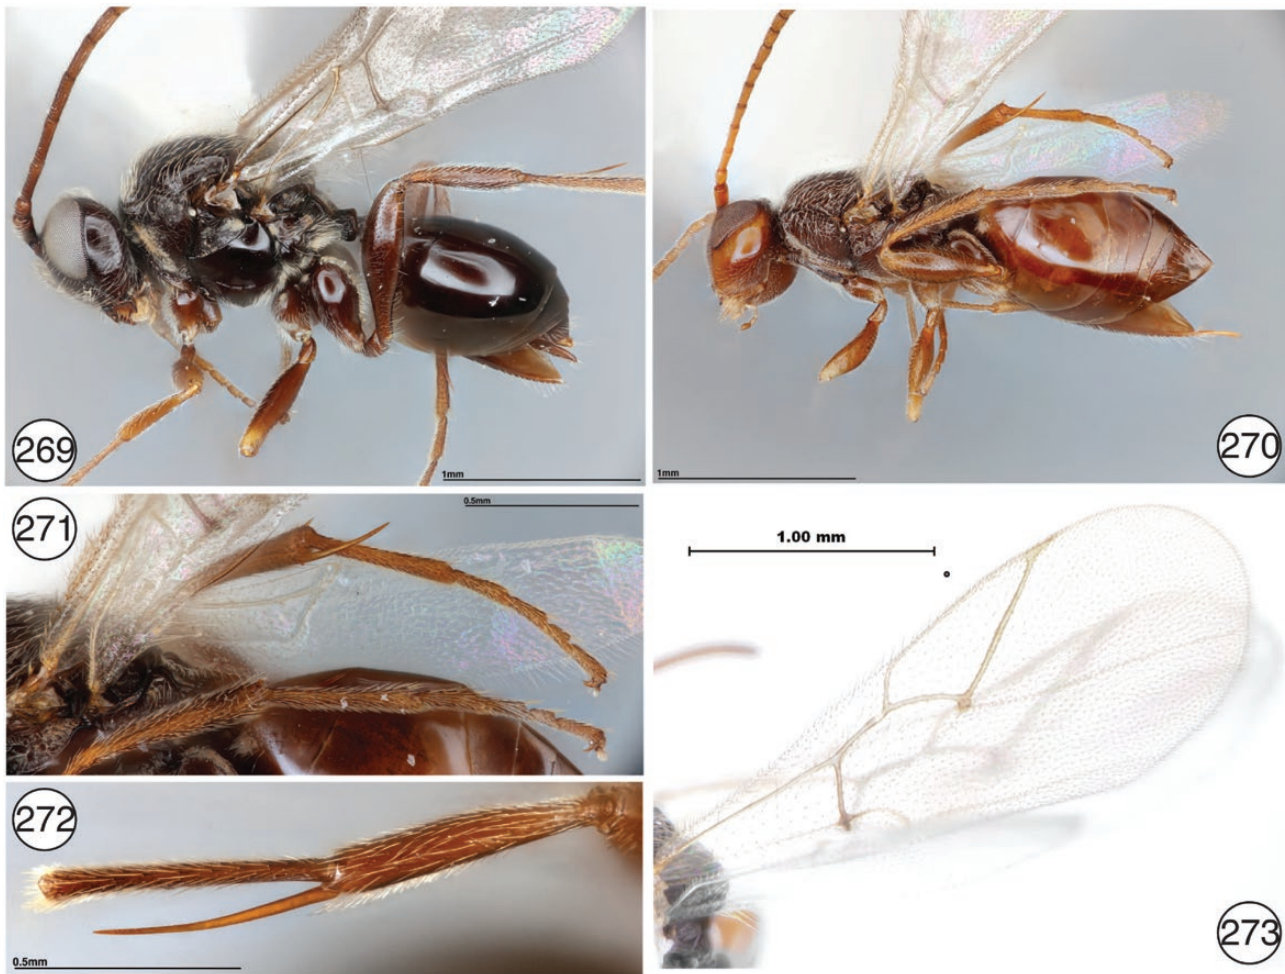

Plate 25. Plectocynipinae. Figs. 269, 272, and 273, *Plectocynips lago*, USNMNT01231872. Figs. 270 and 271, *Araucocynips* sp., USNMNT01231865.

### Plectocynipinae

Figs. 269–273

This is another small group of gall-associated Figitidae that were considered members of the informal ‘figitoid inquiline’ group of Ronquist (1994; 1999). Ros-Farré and Pujade-Villar (2007) moved both *Plectocynips* and *Pegascynips* to Plectocynipinae. The group is very small, and is strongly associated with galls on *Nothofagus* forests in temperate South America. While rare in collections, relatively large numbers can be obtained from careful rearing of galls, or canopy fogging *Nothofagus*.

Biology. Associated with *Aditrochus* species (Chalcidoidea: Pteromalidae: Ormocerinae) and unidentified hymenopterous gallers on *Nothofagus* spp. (Fagaceae).

Distribution. Neotropical Region; temperate South America.

Relevant literature. Weld (1952) moved *Pegascynips* from Liopteridae to Figitidae. Ros-Farré and Pujade-Villar (2007) described the subfamily. Buffington and Nieves-Aldrey (2011) revised the subfamily. Buffington et al. (2007, 2012) investigated the phylogeny of the group.

Classification.

Plectocynipinae Ros-Farré and Pujade-Villar, 2007

*Araucocynips* Buffington and Nieves-Aldrey, 2011; 2 species NT  
*Pegascynips* Brèthes, 1928; 1 species NT  
*Plectocynips* Díaz, 1976; 3 species NT



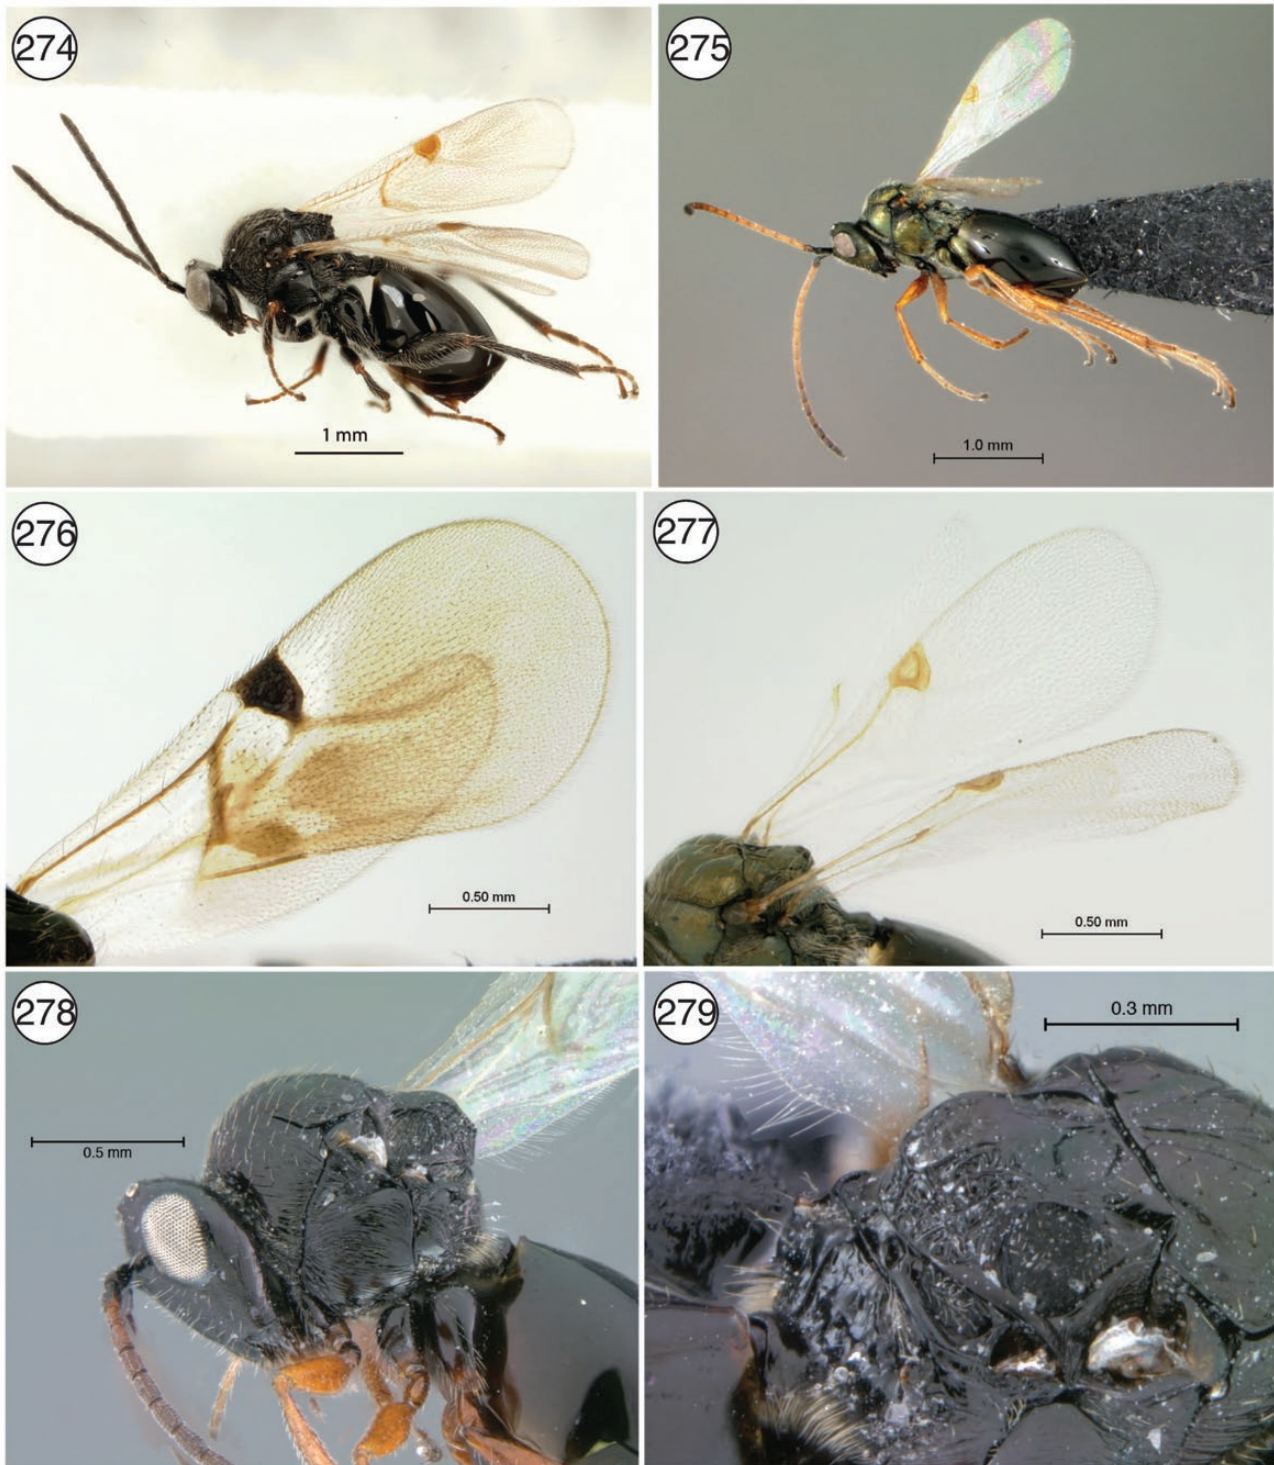

**Plate 26.** Pycnostigminae. Fig. 274, *Pycnostigmus rostratus* Cameron, 1905, USNM01231880. Figs. 275 and 277, *Pycnostigmus mastersonae* Buffington and van Noort, 2007, SAM-HYM-P0024397. Fig. 276, *Tylosema dayae* Buffington and van Noort, 2007, SAM-HYM-P0024394. Figs. 278 and 279, *Trjapitziniola vanharteni* Buffington and van Noort 2007, USNM00764764.

**Pycnostigminae**

**Figs. 274–279**

This charismatic and poorly known figitid group has a unique vein structure in the forewing; the veins of the marginal cell are heavily expanded, nearly closing the marginal cell, resulting in a pseudopterostigma. The only known metallic-colored figitid (*Pycnostigmus mastersonae*) belongs to the pycnostigmines. Their

biology is unknown; all known specimens have been passively collected in Malaise traps

Biology. Hosts unknown.

Distribution. Afrotropical and Palearctic; most species from Western Cape Province, RSA. Rarely collected in arid southern Palearctic (North Africa and Southwest Asia).



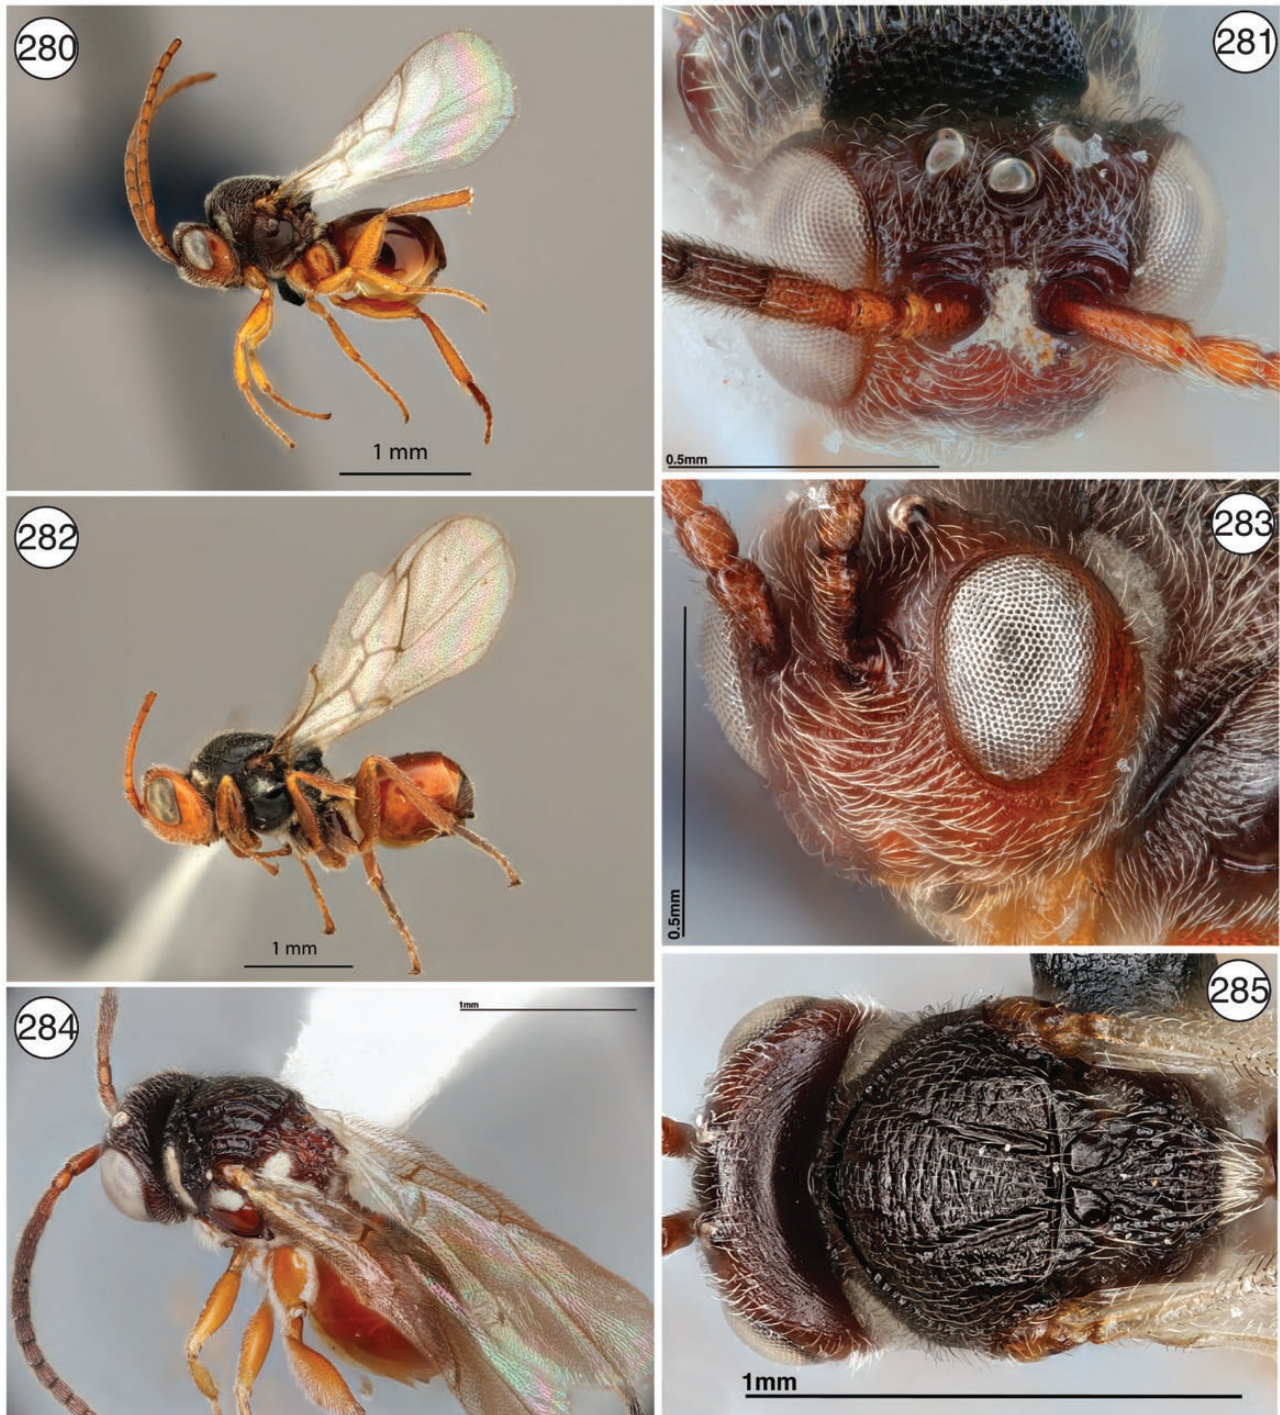

**Plate 27.** Thrasorinae. Figs. 280, 283, and 285, *Myrtopsen mimosae*, USNMENT01525867. Figs. 281 and 284, *Scutimica* sp., USNMENT01231860. Fig. 282, *Thrasorus pilosus* Weld, 1944, USNMENT01231876.

Relevant literature. Buffington and van Noort (2007) revised the genus. Buffington et al. (2007, 2012) investigated the phylogeny of the group.

#### Classification.

Pycnostigminae Cameron, 1905

*Pycnostigmus* Cameron, 1905; 5 species South Africa  
*Trjapitziniola* Kovalev, 1995; 2 species Southwest Asia  
*Tylosema* Kieffer, 1905; 3 species South and North Africa

#### Thrasorinae

##### Figs. 280–285

The majority of genera that have been previously treated by Ronquist (1994, 1999) as 'figitoid inquilines' are now members of this small subfamily. All members of this group are associated with galls; however, the species are from various regions, and in some cases, details of their biology is unknown. In most cases, very few specimens of these species are in collections. The outlier here is *Myrtopsen*, which can readily be reared from tanaostigmatids on Fabaceae in the Nearctic and Neotropical Regions. Phylogenetically, the group



is relatively plesiomorphic within Figitidae and forms a grade along with Euceroptinae and Plectocynipinae (Buffington et al. 2007).

Biology. In most cases, unknown but presumably associated with galls. *Myrtopsen* is a primary parasitoid of Tanaostigmatidae (Chalcidoidea) on Malvaceae and Fabaceae (Buffington et al. 2012).

Distribution. Fragmented: Nearctic Region (*Myrtopsen*); Neotropical Region (*Myrtopsen*, *Scutimica*); Austral-Asian Region (*Thrasorus*, *Palmiriella*, *Cicatrix*).

Relevant literature. Paretas-Martinez et al. (2011) investigated Australian thrasorines; Ros-Farré and Pujade-Villar (2009b) revised *Myrtopsen*. Ros-Farré and Pujade-Villar (2007) described *Scutimica*. Ronquist (1999) discussed the so-called figitoid inquilines. Buffington et al. (2007, 2012) investigated the phylogeny of the group.

Classification.

Thrasorinae Kovalev, 1994

*Cicatrix* Paretas-Martinez, 2011; 3 species AU  
*Myrtopsen* Rübsaamen, 1908; 12 species NT, NA, ePA  
*Palmiriella* Pujade-Villar and Paretas-Martinez, 2011; 1 species AU  
*Scutimica* Ros-Farré, 2007; 2 species AU  
*Thrasorus* Weld, 1944; 3 species AU

## Acknowledgments

We thank all of the students from the 2012, 2014, 2015, 2016, and 2018 iterations of The Hym Course for helping to improve the efficacy and efficiency of this key. Smithsonian intern Alexandre Andes-Gascon helped identify some subtle errors. Several reviewers of earlier versions of this ms helped us immensely with the key and taxonomic summaries; we greatly appreciate this help. C.T. was supported by USFS agreement 60-8042-8-002/8042-22000-289-01-S. Mention of trade names or commercial products in this publication is solely to provide specific information and does not imply recommendation or endorsement by the USDA. USDA is an equal opportunity provider and employer.

## References Cited

- Abe, Y. 2007. Parallelism in secondary loss of sex from a heterogonic life cycle on different host plants in the *Andricus mukaigawae* complex (Hymenoptera: Cynipidae), with taxonomic notes. J. Nat. His. 41: 473–480.
- Abe, Y. 2009. The effect of the age of the serpentine leafminer *Liriomyza trifolii* (Diptera: Agromyzidae) on parasitism by the parasitoid wasp *Gronotoma micromorpha* (Hymenoptera: Figitidae: Eucolilinae). Eur. J. Entomol. 106: 595–598.
- Abe, Y., G. Melika, and G. N. Stone. 2007. The diversity and phylogeography of cynipid gallwasps (Hymenoptera: Cynipidae) of the Oriental and eastern Palearctic regions, and their associated communities. Orient. Insects 41: 169–212.
- Abe, Y., T. Ide, and N. Wachi. 2011. Discovery of a new gall-inducing species in the inquiline tribe Synergini (Hymenoptera: Cynipidae): inconsistent implications from biology and morphology. Ann. Entomol. Soc. Am. 104: 115–120.
- Ács, Z., G. Melika, Z. Péntes, J. Pujade-Villar and G. N. Stone. 2007. The phylogenetic relationships between *Dryocosmus*, *Chilaspis* and allied genera of oak gallwasps (Hymenoptera, Cynipidae: Cynipini). Syst. Entomol. 32: 70–80. doi:10.1111/j.1365-3113.2006.00351.x
- Aebi, A., K. Schönrogge, G. Melika, A. Alma, G. Bosio, A. Quacchia, L. Picciau, Y. Abe, S. Moriya, K. Yara, et al. 2006. Parasitoid recruitment to the globally invasive chestnut gall wasp *Dryocosmus kuriphilus*, pp. 103–122. In K. Ozaki, J. Yukawa, T. Ohgushi, P. W. Price (eds), Galling arthropods and their associates. Springer, Tokyo, Japan.
- Allemand, R., C. Lemaître, F. Frey, M. Bouletreau, F. Vavre, G. Nordlander, J. van Alphen and Y. Carton. 2002. Phylogeny of six African *Leptopilina* species (Hymenoptera: Cynipoidea, Figitidae), parasitoids of *Drosophila*, with description of three new species. Ann. Soc. Entomol. Fr. 38: 319–332.
- Alonso-Zarazaga, M. A., and J. L. Nieves-Aldrey. 2002. Sobre el autor y la fecha de la familia Cynipidae. Graellsia. 58: 89.
- van Alphen, J., G. Nordlander, and I. Eijs. 1991. Host habitat finding and host selection of the *Drosophila* parasitoid *Leptopilina australis* (Hymenoptera, Eucolilidae), with a comparison of the niches of European *Leptopilina* species. Oecologia. 87: 324–329.
- APHIS Environmental Assessment. 2011. Field release of the gall wasp, *Aulacidea subterminalis* (Hymenoptera: Cynipidae), for biological control of invasive hawkweeds (*Hieracium* spp.) in the continental United States. [https://www.aphis.usda.gov/plant\\_health/ea/downloads/Aulacidea\\_subterminalis\\_EA\\_with\\_fonsi.pdf](https://www.aphis.usda.gov/plant_health/ea/downloads/Aulacidea_subterminalis_EA_with_fonsi.pdf).
- Ashmead, W. H. 1896. Descriptions of new parasitic Hymenoptera. T. Am. Entomol. Soc. 23: 179–190.
- Beardsley, J. W. 1989. Hawaiian Eucolilidae (Hymenoptera: Cynipoidea). Key to genera and taxonomic notes on apparently non-endemic species, Proc. Hawaii Entomol. Soc. 29: 165–193.
- Buffington, M. L. 2007. The occurrence and phylogenetic implications of the ovipositor clip within the Figitidae (Insecta: Hymenoptera: Cynipoidea). J. Nat. His. 41: 2267–2282.
- Buffington, M. L. 2008. A revision of Australian Thrasorinae (Hymenoptera: Figitidae) with a description of a new genus and six new species. Aust. J. Entomol. 47: 203–212.
- Buffington, M. L. 2009. Description, circumscription and phylogenetics of the Zaeucoilini, new tribe (Hymenoptera: Figitidae: Eucolilinae), including a description of a new genus. Syst. Entomol. 34: 162–187.
- Buffington, M. L. 2010a. A revision of *Ganaspidium* Weld, 1952 (Hymenoptera, Figitidae, Eucolilinae): new species, bionomics, and distribution. ZooKeys. 37: 81–101. doi:10.3897/zookeys.37.311
- Buffington, M. L. 2010b. The Description of *Banacuniculus* Buffington, New Genus (Hymenoptera: Figitidae: Eucolilinae). J. Hym. Res. 19: 94–112.
- Buffington, M. L. 2011. Description, circumscription and phylogenetics of the Diglyphosematini Belizin, 1961, and the description of a new genus (Hymenoptera: Figitidae: Eucolilinae). Proc. Entomol. Soc. Wash. 113: 239–290.
- Buffington, M. L., and J. Liljeblad 2008. The description of Euceroptinae, a new subfamily of Figitidae (Hymenoptera), including a revision of *Euceroptres* Ashmead, 1896, and the description of a new species. J. Hym. Res. 17: 44–56.
- Buffington, M. L., and S. van Noort. 2007. A world revision of the Pycnostigminae (Cynipoidea: Figitidae) with descriptions of seven new species. Zootaxa. 1392: 1–30.
- Buffington, M. L., and S. van Noort. 2009. A world revision of *Anacharoides* Cameron, 1904 (Hymenoptera: Figitidae) with a description of a new species. ZooKeys. 20: 245–274. doi:10.3897/zookeys.20.124
- Buffington, M. L., and S. van Noort. 2012. Revision of the Afrotropical Oberthuerellinae (Cynipoidea, Liopteridae). ZooKeys. 202: 1–154. <https://doi.org/10.3897/zookeys.202.2136>
- Buffington, M. L., Z. Liu, and F. Ronquist. 2006. Cynipoidea, pp. 811–823. In F. Fernández and M. J. Sharkey (eds.), Introducción a los Hymenoptera de la Región Neotropical. Sociedad Colombiana de Entomología y Universidad Nacional de Colombia, Bogotá, Colombia.
- Buffington, M. L., J. A. A. Nylander, and J. Heraty. 2007. The phylogeny and evolution of Figitidae (Hymenoptera: Cynipoidea). Cladistics. 23: 1–29.
- Buffington, M. L., and J. L. Nieves-Aldrey. 2011. Revision of Plectocynipinae (Hymenoptera: Figitidae) with descriptions of a new genus and three new species from Chile. Proc. Entomol. Soc. Wash. 113: 91–108.
- Buffington, M. L., S. Brady, S. Morita, and S. van Noort. 2012. Divergence estimates and early evolutionary history of Figitidae (Hymenoptera: Cynipoidea). Syst. Entomol. 37: 287–304.
- Buffington, M. L., J. Prasifka, M. M. W. Gates, R. R. Kula, and K. Petersen. 2017. New host plant and distribution records for *Antistrophus laciniatus*

- Gillette, 1891 (Hymenoptera: Cynipidae), an herb gall wasp on *Silphium integrifolium* Michx. (Asteraceae), with notes on other *S. integrifolium*-associated wasps. Proc. Entomol. Soc. Wash. 119: 660–667.
- Buffington, M. L., F. E. Gallardo, V. Reche, and M. Forshage. 2018. A revision of *Zaeucoila* Ashmead (Hymenoptera, Figitidae), parasitoids of Agromyzidae (Diptera); new species, identity, distribution and hosts. Proc. Entomol. Soc. Wash. 119: 317–397.
- Burks, B. D. 1979. Cynipoidea, pp. 1045–1107. In K. V. Krombein, P. D. Hurd, D. R. Smith, and B. D. Burks, (eds.), Catalog of Hymenoptera North of Mexico. Smithsonian Institution Press, Washington, DC.
- Costa Baião, G., and M. Forshage. 2018. Revision of the West Palearctic species of *Rhoptromeris* Förster, 1869. J. Nat. Hist. 52: 1201–1224.
- Coulianos, C. C., and I. Holmåsén. 1991. Galler. En fälthandbok om gallbildningar på vilda och odlade växter. 317 pp. Interpublishing, Stockholm, Sweden.
- Csóka, G., G. N. Stone, and G. Melika. 2005. Biology, ecology, and evolution of gall-inducing Cynipidae, pp. 569–636. In A. Raman, C. W. Schaefer and T. M. Withers (eds.), Biology, ecology, and evolution of gall-inducing arthropods. Science Publishers, Inc., Enfield, NH.
- Dalla Torre, K. W., and J. J. Kieffer. 1910. *Cynipidae*, Das Teirreich V. 24, 891p. Verlag von R. Friedländer und Sohn, Berlin, Germany.
- Ferrer-Suay, M., and L. M. Garrido-Salas. 2014. Interactive Charipinae Worldwide Database: a valuable tool for entomologists, agronomists and pest controllers. Butll. Inst. Cat. Hist. Nat. 78: 83–91.
- Ferrer-Suay, M., J. Paretas-Martínez, J. Selfa, and J. Pujade-Villar. 2012. Taxonomic and synonymic world catalogue of the Charipinae and notes about this subfamily (Hymenoptera: Cynipoidea: Figitidae). Zootaxa. 3376: 1–92.
- Ferrer-Suay, M., J. Selfa, A. Equiha-Martínez, E. Estrada-Venegas, R. Lomeli-Flores, R. Peña-Martínez, and J. Pujade-Villar. 2013a. Charipinae (Hymenoptera: Cynipoidea: Figitidae) from Mexico with description of three new species. Ann. Entomol. Soc. Am. 106: 26–41.
- Ferrer-Suay, M., J. Selfa, and J. Pujade-Villar. 2013b. Charipinae fauna (Hymenoptera: Figitidae) from Asia, with description of eleven new species. Zool. Studies. 52: 41: 1–26.
- Ferrer-Suay, M., J. Selfa, and J. Pujade-Villar. 2014. First records, new species and a key of the Charipinae (Hymenoptera: Cynipoidea: Figitidae) from the Nearctic region. Ann. Entomol. Soc. Amer. 107: 50–73.
- Ferrer-Suay, M., J. Selfa, and J. Pujade-Villar. 2018. Palaearctic species of Charipinae (Hymenoptera, Figitidae): two new species, syntheses and identification key. Eur. J. Taxon. 427: 1–110.
- Fontal-Cazalla, F. M., M. L. Buffington, G. Nordlander, J. Liljebblad, P. Ros-Farré, J. L. Nieves-Aldrey, J. Pujade-Villar, and F. Ronquist. 2002. Phylogeny of the Eucilinae (Hymenoptera: Cynipoidea: Figitidae). Cladistics. 18: 154–199.
- Forshage, M. 2009. Systematics of Eucilini. Exploring the diversity of a poorly known group of cynipoid parasitic wasps. Doctoral Dissertation. Faculty of Science and Technology, Uppsala University, Uppsala, Sweden.
- Forshage, M., and G. Nordlander. 2008. Identification key to European genera of Eucilinae (Hymenoptera, Cynipoidea, Figitidae). Insect Syst. Evol. 39: 341–359.
- Forshage, M., and G. Nordlander. 2018. The identity of figitid parasitoids (Hymenoptera: Cynipoidea: Figitidae) of anthomyiid flies in conifer cones. Eur. J. Entomol. 115: 104–111.
- Forshage, M., G. Nordlander, and M. L. Buffington. 2013. Eucilinae of North America: a revised catalog of genera and described species. Proc. Ent. Soc. Wash. 115: 225–255.
- Goulet, H., and Huber, J. (eds) 1993. Hymenoptera of the world: an identification guide to families. Centre for Land and Biological Resources Research. Issued by Research Branch. Agriculture Canada, Ottawa, Canada.
- Hedicke, H., and G. Kerrich. 1940. A revision of the family Liopteridae (Hymenopt., Cynipoidea). T. Roy. Entomol. Soc. London. 90: 177–228.
- Hurley, B. P., K. N. Fitz, M. J. Wingfield, and B. Slippers. 2020. Sequence data reflect the introduction pathways of the Sirex woodwasp parasitoid, *Ibalia leucospoides* (Ibaliidae, Hymenoptera). Agric. For. Entomol. 22: 129–135.
- Ide, T., and Y. Abe. 2015. A new species of *Dryocosmus* Giraud (Hymenoptera: Cynipidae: Cynipini) in Japan and Korea—first record of Eastern Palearctic *Dryocosmus* species showing alternation of generations on Section *Cerris* oaks. Proc. Entomol. Soc. Wash. 117: 467–480.
- Ide, T., N. Wachi, and Y. Abe. 2010. Discovery of a new *Plagiostrochus* species (Hymenoptera: Cynipidae) inducing galls on the evergreen oak in Japan. Ann. Entomol. Soc. Am. 103: 838–843.
- Ide, T., N. Wachi, and Y. Abe. 2012. Three new species and a new record of *Cycloneuroterus* (Hymenoptera: Cynipidae: Cynipini) inducing galls on *Cyclobalanopsis* in Japan. Ann. Entomol. Soc. Am. 105: 539–549.
- Ide, T., N. Wachi, and Y. Abe. 2013. Description of two new species of *Dryocosmus* (Hymenoptera: Cynipidae: Cynipini) inducing galls on the strictly Asian subgenus *Cyclobalanopsis* of the genus *Quercus*, with a key to species of *Dryocosmus* in East Asia. Ann. Entomol. Soc. Am. 106: 18–25.
- Ide, T., J. Kusumi, K. Miura, and Y. Abe. 2018. Gall inducers arose from inquilines: phylogenetic position of a gall-inducing species and its relatives in the inquiline tribe Synergini. Ann. Entomol. Soc. Am. 111: 6–12.
- Jiménez, M., N. B. Díaz, F. Gallardo, P. Ros-Farré, and J. Pujade-Villar. 2008d. Revisión de las especies sudamericanas del género *Neralsia* Cameron (Hymenoptera: Cynipoidea: Figitidae: Figitinae) con la descripción de 8 especies nuevas. Revista de Biología Neotropical. 56: 795–838.
- Jiménez, M., J. Paretas-Martínez, and J. Pujade-Villar. 2008a. Revisión de las especies de *Neralsia* de Centroamérica y las Antillas, con la descripción de once especies nuevas (Hymenoptera: Figitidae: Figitinae). Dugesiana. 15: 45–68.
- Jiménez, M., J. Paretas-Martínez, and J. Pujade-Villar. 2008b. Revision of the species of *Neralsia* (Hymenoptera: Figitidae: Figitinae) from North America. Ann. Entomol. Soc. Am. 101: 993–1002.
- Jiménez, M., J. Paretas-Martínez, and J. Pujade-Villar. 2008c. Revision of *Xyalophora* Kieffer and description of *Xyalophoroides* n. gen. (Hymenoptera: Cynipoidea: Figitidae: Figitinae). Eur. J. Entomol. 105: 751–769.
- Kieffer, J. J. 1904. Les Cynipides. Supplement aux Cynipides. Eucelinae. Hym. Eur. 7: 603–631.
- Latreille, P. A. 1802. Histoire naturelle, generale et particuliere, des Crustaces et des Insectes. Ouvrage faisant Suite aux Oeuvres de Leclerc de Buffon, et Partie du Cours complet d'Histoire naturelle redige par C.S. Sonnini. Par P.A. Latreille. Tom 1–14. Paris. X-XIII [1802–1805].
- van Lenteren, J. C., N. Isidoro, and F. Bin. 1998. Functional anatomy of the ovipositor clip in the parasitoid *Leptopilina heterotoma* (Thomson) (Hymenoptera: Eucilidae), a structure to grip escaping larvae. Int. J. Insect Morphol. 27: 263–268.
- Liljebblad, J., and F. Ronquist. 1998. A phylogenetic analysis of higher-level gall wasp relationships (Hymenoptera: Cynipidae). Syst. Entomol. 23: 229–252.
- Liljebblad, J., F. Ronquist, J. L. Nieves-Aldrey, F. Fontal-Cazalla, P. Ros-Farré, and D. Gaitros. 2008. A fully web-illustrated morphological phylogenetic study of relationships among oak gall wasps and their closest relatives (Hymenoptera: Cynipidae). Zootaxa. 1796: 1–73.
- Liljebblad, J., J. L. Nieves-Aldrey, S. Nesar, and G. Melika. 2011. Adding another piece to the cynipoid puzzle: the description of a new tribe, genus and species of gall wasp (Hymenoptera: Cynipidae) endemic to the Republic of South Africa. Zootaxa. 2806: 35–52.
- Lin, K. S. 1987. *Aganaspis*, a new genus of Eucilidae (Hymenoptera: Cynipoidea). Taiwan Ag. Res. Inst., special publication. 22: 67–79.
- Lin, K. S. 1988. The Eucilidae from Taiwan (Hymenoptera: Cynipoidea). J. Taiwan Mus. 41(2): 1–66.
- Liu, Z., and M. Engel. 2007. Phylogeny and Geological History of the cynipoid wasps (Hymenoptera: Cynipoidea). Am. Mus. Nov. 3583: 1–48.
- Liu, Z., and G. Nordlander. 1992. Ibaliid parasitoids of siricid wood-wasps in North America: Two new *Ibalia* species and a key to species (Hymenoptera: Cynipoidea). Proc Ent. Soc. Wash. 94: 500–507.
- Liu, Z., and G. Nordlander. 1994. Review of the family Ibaliidae (Hymenoptera: Cynipoidea) with keys to genera and species of the world. Entomol. Scan. 25: 377–392.
- Liu, Z., F. Ronquist, and G. Nordlander. 2007. The cynipoid genus *Paramblynotus*: revision, phylogeny, and historical biogeography (Hymenoptera, Liopteridae). Bull. Am. Mus. Nat. His. 304: 1–151.
- Lobato-Vila, I., and J. Pujade-Villar. 2019. Revision of world Cerotropesini (Hymenoptera: Cynipidae) with the description of a new genus and five new species. Zootaxa. 4685: 1–67.



- Lue, C. H., A. Driskell, J. Leips, and M. L. Buffington. 2016. Review of the genus *Leptopilina* (Hymenoptera, Cynipoidea, Figitidae, Eucolilinae) from the Eastern United States, including three newly described species. *J. Hym. Res.* 53: 35–76.
- Mata-Casanova, N., J. Selfa, F. E. Gallardo, and J. Pujade-Villar. 2019. *Aegilips chilensis* (Hymenoptera: Cynipoidea: Figitidae: Anacharitinae): Redescription and biogeographic considerations. *Neotrop. Entomol.* 48: 628–632.
- Mata-Casanova, N., J. Selfa, and J. Pujade-Villar. 2015a. Revision of the genus *Xyalaspis* Hartig, 1843 (Hymenoptera: Figitidae: Anacharitinae) in the Western Palearctic. *Zoosystema.* 37: 31–43.
- Mata-Casanova, N., J. Selfa, and J. Pujade-Villar. 2015b. Description of two new species of *Anacharis* Dalman, 1823 (Hymenoptera: Figitidae, Anacharitinae) from the Afrotropical region. *African Entomol.* 314–320.
- Mata-Casanova, N., J. Selfa, and J. Pujade-Villar. 2017. Revision of the current knowledge of genus *Aegilips* Haliday, 1835 (Hymenoptera: Figitidae: Anacharitinae) in the Afrotropical region, with description of three new species. *African Entomol.* 62–71.
- Medianero, E., and J. L. Nieves-Aldrey. 2011. First record of the genus *Discholcaspis* Dall Torre & Kieffer (Hymenoptera, Cynipidae, Cynipini) in the Neotropics, with description of two new species from Panama. *Zootaxa.* 2802: 23–33.
- Medianero, E., and J. L. Nieves-Aldrey. 2013. *Barucynips panamensis*, a new genus and species of oak gallwasps (Hymenoptera, Cynipidae, Cynipini) from Panama, and description of one new species of *Coffeikokkos*. *Zookeys.* 277: 25–46.
- Medianero, E. and J. L. Nieves-Aldrey and G. Melika. 2011. Two new Neotropical species of oak gall wasps of the genus *Loxaulus* Mayr (Hymenoptera: Cynipidae: Cynipini) from Panama. *Zootaxa.* 2811: 37–46.
- Melika, G. 2006. Gall wasps of Ukraine. Cynipidae. *Vestnik zoologii, supplement 21, vol. 1–2.*
- Melika, G. 2012. Superfamily Cynipoidea – cynipoids or gallwasps, pp. 139–146. In A. Lelej (ed.) *Annotated catalogue of the insects of the Russian Far East. Vol. I. Hymenoptera.* Vladivostok. Dalnauka, Russia (in Russian)
- Melika, G., and W. G. Abrahamson. 2002. Review of the world genera of oak cynipid wasps (Hymenoptera: Cynipidae: Cynipini), pp. 150–190. In G. Melika, and C. Thuroczy (eds.), *Parasitic Wasps: evolution, systematics, biodiversity and biological control.* Agrioinform, Budapest, Hungary.
- Melika, G., J. Pujade-Villar, Y. Abe, C. T. Tang, J. A. Nicholls, N. Wachi, T. Ide, M. M. Yang, Z. Péntzes, G. Csóka, and G. N. Stone. 2010. Palearctic oak gallwasps galling oaks (*Quercus*) in the section Cerris: re-appraisal of generic limits, with descriptions of new genera and species (Hymenoptera: Cynipidae: Cynipini). *Zootaxa.* 2470: 1–79.
- Melika, G., C. T. Tang, J. A. Nicholls, M. M. Yang, and G. N. Stone. 2011. Four new species of *Dryocosmus* gallwasps from Taiwan (Hymenoptera: Cynipidae: Cynipini). *ISRN Zoology.* 17 pp. doi:10.5402/2011/725180
- Melika, G., E. Buss, J. Nicholls, J. Platt Bird, and G. N. Stone. 2013a. Life cycle of *Discholcaspis quercusvirens* (Hymenoptera: Cynipidae) with a description of the sexual generation. *Florida Entomol.* 96: 991–1001.
- Melika, G., C. T. Tang, F. Sinclair, M. M. Yang, K. Lohse, J. Hearn, J. A. Nicholls and G. N. Stone. 2013b. A new genus of oak gallwasp, *Cyclocynips* Melika, Tang & Sinclair (Hymenoptera: Cynipidae: Cynipini), with descriptions of two new species from Taiwan. *Zootaxa.* 3630: 534–548.
- Menke, A. S., and H. H. Evenhuis. 1991. North American Charipidae, key to genera, nomenclature, species checklist and a new species of *Dilyta* Förster (Hymenoptera, Cynipoidea). *Proc. Entomol. Soc. Wash.* 93: 136–158.
- Nicholls, J. A., G. N. Stone, and G. Melika. 2018. A new genus of oak gallwasp, *Protobalandricus* Melika, Nicholls & Stone (Hymenoptera: Cynipidae: Cynipini) from California. *Zootaxa.* 4472: 141–152.
- Nieves-Aldrey, J. L. 1994. Revision of the West-European Genera of the Tribe Aylacini Ashmead (Hymenoptera, Cynipidae). *J. Hym. Res.* 3: 175–206
- Nieves-Aldrey, J. L. 2001. Hymenoptera: Cynipidae: Fauna Iberica, vol. 16, 636 pp. M. A. Ramos et al. (eds.). Museo Nacional de Ciencias Naturales. CSIC, Madrid, Spain.
- Nieves-Aldrey, J. L. 2002. Notes on the morphology and biology of *Neaylax salviae* (Giraud), a cynipid new to the Iberian fauna, with a description of the larva (Hymenoptera, Cynipidae). *Bol. Soc. Entomol. Arag.* 31: 61–65.
- Nieves-Aldrey, J. L. 2012. Revision of the *Amphibolips* species of Mexico excluding the “niger complex” Kinsey (Hymenoptera: Cynipidae), with description of seven new species. *Zootaxa* 3545: 1–40.
- Nieves-Aldrey, J. L., J. Liljeblad, M. Hernández-Nieves, A. Grez, and J. A. A. Nylander. 2009. Revision and phylogenetics of the genus *Paraulax* Kieffer (Hymenoptera, Cynipidae) with biological notes and description of a new tribe, a new genus, and five new species. *Zootaxa.* 2200: 1–40.
- Nieves-Aldrey, J. L., and G. San Blan. 2015. Revision of the Neotropical genus *Eschatocerus* Mayr (Hymenoptera, Cynipidae, Eschatocerini) with biological notes and the first description of the terminal larva. *Zootaxa* 4012: 135–155.
- van Noort, S., and M. L. Buffington. 2013. Revision of the Afrotropical Mayrellinae (Cynipoidea: Liopteridae), with the first record of the genus from Madagascar. *J. Hym. Res.* 31: 1–64. doi:10.3897/jhr.31.4072.
- van Noort, S., G. N. Stone, V. B. Whitehead, and J. L. Nieves-Aldrey. 2007. Biology of *Rhoophilus loewi* (Hymenoptera: Cynipoidea: Cynipidae), with implications for the evolution of inquiline in gall wasps. *Biol. J. Linn. Soc.* 90: 153–172. doi:10.1111/j.1095-8312.2007.00719.x.
- van Noort, S., M. L. Buffington, and M. Forshage. 2014. Review of Afrotropical Figitinae (Figitidae, Cynipoidea, Hymenoptera) with the first record of *Neralsia* and *Lonchidia* for the region. *ZooKeys.* 453: 37–69. doi:10.3897/zookeys.453.8511.
- van Noort, S., M. L. Buffington, and M. Forshage. 2015. Afrotropical Cynipoidea. *Zookeys.* 493: 1–176. doi:10.3897/zookeys.493.6353.
- Nordlander, G. 1976. Studies on Eucolilidae (Hymenoptera: Cynipoidea) I. A revision of the north-western European species of *Cothonaspis* Htg. with a description of a new species and notes on some other genera. *Entomol. Tids.* 97: 65–77.
- Nordlander, G. 1978. Revision of genus *Rhoptomeres* Förster, 1869 with reference to north-western European species. *Studies on Eucolilidae (Hymenoptera: Cynipoidea) II.* *Entomol. Scan.* 9: 47–62.
- Nordlander, G. 1980. Revision of the genus *Leptopilina* Förster, 1869, with notes on the status of some other genera (Hymenoptera, Cynipoidea, Eucolilidae). *Entomol. Scan.* 11: 428–453.
- Nordlander, G. 1981. A review of the genus *Trybliographa* Förster, 1869 (Hymenoptera, Cynipoidea: Eucolilidae). *Entomol. Scan.* 12: 381–402.
- Nordlander, G. 1982a. Identities and relationships of the previously confused genera *Odonteucoila*, *Conucoila*, and *Trichoplasta* (Hymenoptera, Cynipoidea: Eucolilidae). *Entomol. Scan.* 13: 269–292.
- Nordlander, G. 1982b. Systematics and phylogeny of an interrelated group of genera within the family Eucolilidae (Insecta: Hymenoptera: Cynipoidea). PhD thesis. Stockholm University. 34 pp.
- Nordlander, G., Z. Liu, and F. Ronquist. 1996. Phylogeny and historical biogeography of the cynipoid wasp family Ibalidae (Hymenoptera). *Syst. Entomol.* 21: 151–166.
- Novkovic, B., H. Mitsui, A. Suwito, and M. T. Kimura. 2011. Taxonomy and phylogeny of *Leptopilina* species (Hymenoptera: Cynipoidea: Figitidae) attacking frugivorous drosophilid flies in Japan, with description of three new species. *Entomol. Sci.* 14: 333–346.
- Paretas-Martínez, J., and J. Pujade-Villar. 2010. First valid records of Figitinae (Hymenoptera: Figitidae) from Australia: *Xyalophora mauri* sp. n. and *Xyalophora australiana* sp. n. *Aust. J. Entomol.* 49: 354–358.
- Paretas-Martínez, J., C. Restrepo-Ortiz, M. L. Buffington, and J. Pujade-Villar. 2011. Systematics of Australian Thrasorinae (Hymenoptera, Cynipoidea, Figitidae) with descriptions of Mikeiinae, new subfamily, two new genera, and three new species. *ZooKeys.* 108: 21–48.
- Paretas-Martínez, J., M. Forshage, M. L. Buffington, N. Fisher, J. La Salle, and J. Pujade-Villar. 2013. Overview of Australian Cynipoidea (Hymenoptera). *Aust. J. Entomol.* 52: 73–86.
- Péntzes, Z., C. T. Tang, P. Bihari, M. Bozsó, S. Schwéger, and G. Melika. 2012. Oak associated inquiline (Hymenoptera, Cynipidae, Synergini). *TISCIA monograph series 11.* Szeged.
- Péntzes, Z., C. T. Tang, G. N. Stone, J. A. Nicholls, S. Schwéger, M. Bozsó, and G. Melika. 2018. Current status of the oak gallwasp (Hymenoptera: Cynipidae: Cynipini) fauna of the Eastern Palearctic and Oriental Regions. *Zootaxa.* 4433: 245–289.
- Pujade-Villar, J. 2019. Reclasificación de los grandes taxa de Cynipoidea (Hymenoptera) desde Weld (1952) hasta 2017: la historia de una lucha evolutiva entre el parasitoidismo y la fitofagia. *Folia Entomol. Mex.* 5: 18–65.

- Pujade-Villar, J., and M. Ferrer-Suay. 2015. Adjudicació genèrica d'espècies mexicanes d'ubicació dubtosa descrites per Kinsey i comentaris sobre la fauna mexicana (Hymenoptera: Cynipidae: Cynipini). *Butll. Inst. Catalana Hist. Nat.* 79: 7–14.
- Pujade-Villar J., M. Ferrer-Suay, V. Cuesta-Porta, and I. Lobato-Vila. 2018. ¿Existe *Biorhiza* Westwood, 1840 (Hymenoptera: Cynipidae) en México? *Folia Entomol. Mex.* 4: 110–127.
- Pujade-Villar, J., and G. Melika. 2014. Re-establishment of *Erythres* Kinsey, 1937 as a valid genus of gallwasps from Mexico (Hymenoptera: Cynipidae: Cynipini). *Dugesiana*. 21: 155–160.
- Pujade-Villar, J., D. Bellido, G. Segú, and G. Melika. 2001. Current state of knowledge of heterogony in Cynipidae (Hymenoptera, Cynipoidea). *Sessió Conjunta de Entomologia ICHN-SCL*. 11: 87–107.
- Pujade-Villar, J., M. Jiménez, and J. Paretas-Martínez. 2008. *Xyalophoroides quinquelmeata* (Say, 1836) (Hymenoptera: Figitidae: Figitinae): a species complex or a very variable species? *Boletín de La S.E.A.* 43: 367–374.
- Pujade-Villar, J., S. Romero-Rangel, C. Chagoyán-García, A. Equihua-Martínez, E. G. Estrada-Venegas, and G. Melika. 2010. A new genus of oak gallwasps, *Kinseyella* Pujade-Villar & Melika, with a description of a new species from Mexico (Hymenoptera: Cynipidae: Cynipini). *Zootaxa*. 2335: 16–28.
- Pujade-Villar, J., P. Hanson, and G. Melika. 2012a. A new genus of oak gallwasp, *Coffeikokkos* Pujade-Villar & Melika, gen. n., with a description of a new species from Costa Rica (Hymenoptera, Cynipidae). *ZooKeys*. 168: 19–29.
- Pujade-Villar, J., P. Hanson, C. A. Medina, M. Torres, and G. Melika. 2012b. A new genus of oak gallwasps, *Zapatella* Pujade-Villar & Melika, gen. n., with a description of two new species from the Neotropics (Hymenoptera, Cynipidae, Cynipini). *ZooKeys*. 210: 75–104.
- Pujade-Villar, J., A. Equihua-Martínez, E. G. Estrada-Venegas, and G. Melika. 2013. A new genus of oak gallwasp, *Kokkocynips* Pujade-Villar & Melika gen. n., with a description of a new species from Mexico (Hymenoptera: Cynipidae). *Acta Zool. Mexicana*. 29: 209–218.
- Pujade-Villar, J., D. Cibrián-Tovar, V. D. Cibrián-Llenderal, A. Equihua-Martínez, E. G. Estrada-Venegas, M. Serrano-Muñoz, and J. R. Lomeli-Flores. 2014. A new genus of oak gallwasp, *Melikaiella* Pujade-Villar (Hymenoptera: Cynipidae: Cynipini), from the Nearctic region. *Dugesiana*. 21: 1–29.
- Pujade-Villar, J., I. Lobato-Vila, and M. Ferrer-Suay. 2017. Restablecimiento del género *Dros* Kinsey (Hymenoptera: Cynipidae: Cynipini) como género válido para especies Americanas. *Entomol. Mexicana*. 4: 752–758.
- Quinlan, J. 1978. Hymenoptera Cynipoidea Eucolidae. Handbooks for the Identification of British Insects, vol 8, part 1b. London, United Kingdom: Royal Entomological Society of London.
- Restrepo-Ortiz, C. X., and J. Pujade-Villar. 2010. The validity of *Hexacharis* Kieffer with taxonomic notes on Anacharitininae genera (Hymenoptera: Cynipoidea: Figitidae). *Zootaxa*. 2400: 16–28.
- Riek, E. F. 1971. A new subfamily of cynipoid wasps (Hymenoptera: Cynipoidea) from Australia, pp. 107–112 *In* S. Asahina (ed.), *Entomological essays to commemorate the retirement of Professor K. Yasumatsu*, pp. 107–112.
- Ritchie, A. J., and J. D. Shorthouse. 1987. Revision of the genus *Synophromorpha* Ashmead (Hymenoptera: Cynipidae). *Can. Entomol.* 119: 215–230.
- Ronquist, F. 1994. Evolution of parasitism among closely related species: Phylogenetic relationships and the origin of inquiline in gall wasps (Hymenoptera, Cynipidae). *Evolution* 48: 241–266.
- Ronquist, F. 1995a. Phylogeny and classification of the Liopteridae, an archaic group of cynipoid wasps (Hymenoptera). *Entomol. Scand. Supplement*. 46: 1–74.
- Ronquist, F. 1995b. Phylogeny and early evolution of the Cynipoidea (Hymenoptera). *Syst. Entomol.* 20: 309–335.
- Ronquist, F. 1999. Phylogeny, classification and evolution of the Cynipoidea. *Zool. Scr.* 28: 139–164.
- Ronquist, F., and J. L. Nieves-Aldrey. 2001. A new subfamily of Figitidae (Hymenoptera, Cynipoidea). *Zool. J. Linn. Soc-Lond.* 133: 483–494.
- Ronquist, F., and G. Nordlander. 1989. Skeletal morphology of an archaic cynipoid, *Ibalia rufipes* (Hymenoptera, Ibalidae). *Entomol. Scand. Suppl.* 33: 1–60.
- Ronquist, F., J.-L. Nieves-Aldrey, M. L. Buffington, Z. Liu, J. Liljeblad, and J. A. A. Nylander. 2015. Phylogeny, evolution and classification of gall wasps: the plot thickens. *PLoS One* 10: e0123301.
- Ronquist, F., J. A. A. Nylander, H. Vårdal, and J. L. Nieves-Aldrey. 2018. Life history of *Parnips* and the evolutionary origin of gallwasps. *J. Hym. Res.* 65: 91–110.
- Ros-Farré, P. 2007. *Pujadella* Ros-Farré, a new genus from the Oriental Region, with a description of two new species (Hymenoptera: Figitidae: Aspicerinae). *Zool. Stud.* 46: 1–5.
- Ros-Farré, P., and J. Pujade-Villar. 2006. Revision of the genus *Prosaspicera* Kieffer, 1907 (Hym, Figitidae: Aspicerinae). *Zootaxa*. 1379: 1–102.
- Ros-Farré, P., and J. Pujade-Villar. 2007. Plectrocynipinae, a new subfamily of Figitidae and description of a new Neotropical genus of Thrasorinae (Hymenoptera: Cynipoidea). *Zootaxa*. 1538: 1–13.
- Ros-Farré, P., and J. Pujade-Villar. 2009a. Revision of the genus *Callaspida* Dahlbom, 1842. (Hym.: Figitidae: Aspicerinae). *Zootaxa*. 2105: 1–31.
- Ros-Farré, P., and J. Pujade-Villar. 2009b. Revisión del género *Myrtopsen* Rübsaamen, 1908 (Hymenoptera: Figitidae: Thrasorinae). *Dugesiana*. 16: 21–33.
- Ros-Farré, P., and J. Pujade-Villar. 2011a. Revision of the genus *Paraspicera* Kieffer, 1907 (Hym: Figitidae: Aspicerinae). *Zootaxa*. 2801: 48–56.
- Ros-Farré, P., and J. Pujade-Villar. 2011b. Revision of the genus *Omalaspis* Giraud, 1860 (Hym.: Figitidae: Aspicerinae). *Zootaxa*. 2917: 1–28.
- Ros-Farré, P., and J. Pujade-Villar. 2013. Revision of the genus *Aspicera* Dahlbom, 1842 (Hym.: Figitidae: Aspicerinae). *Zootaxa*. 3606: 1–110.
- Ros-Farré, P., F. Ronquist, and J. Pujade-Villar. 2000. Redescription of *Acanthaegilips* Ashmead, 1897, with characterization of the Anacharitininae and Aspiceratinae (Hymenoptera: Cynipoidea: Figitidae). *Zool. J. Linn. Soc-Lond.* 129: 467–488.
- Russo, R. 2006. Field guide to plant galls of California and other western states. 400 pp. California Natural History Guides, University of California Press. Berkeley, CA.
- Shorthouse, J. 1993. Adaptations of gall wasps of the genus *Diplolepis* (Hymenoptera: Cynipidae) and the role of gall anatomy in cynipid systematics. *Mem. Entomol. Soc. Can.* 165: 139–163.
- Shorthouse, J. 2001. Galls induced by cynipid wasps of the genus *Diplolepis* (Cynipidae, Hymenoptera) on cultivated shrub roses in Canada. *Acta Hort.* 547: 83–93.
- Stone, G. N., K. Schönrogge, R. J. Atkinson, D. Bellido, and J. Pujade-Villar. 2002. The population biology of oak gall wasps (Hymenoptera: Cynipidae). *Ann. Rev. Entomol.* 47: 633–668.
- Stone, G. N., A. Hernandez-Lopez, J. A. Nicholls, E. D. Pierro, J. Pujade-Villar, G. Melika, and J. M. Cook. 2009. Extreme host plant conservatism during at least 20 million years of host plant pursuit by oak gallwasps. *Evolution*. 63: 854–869.
- Syrett, P., L. Smith, G. Grosskopf, and C. Meurk. 2001. Predicting the likely success of biocontrol of hawkweeds in New Zealand. *Plant Prot. Quar.* 16: 172–176.
- Tang, C. T., G. Melika, M. M. Yang, A. A. Nicholls, G. Csóka, and G. N. Stone. 2009. First record of an *Andricus* oak gallwasp from the Oriental region: a new species from Taiwan (Hymenoptera: Cynipidae: Cynipini). *Zootaxa*. 2175: 57–65.
- Tang, C. T., G. Melika, J. A. Nicholls, M. M. Yang, and G. N. Stone. 2011. A new genus of oak gallwasps, *Cycloneuroterus* Melika & Tang, with the description of five new species from Taiwan (Hymenoptera: Cynipidae: Cynipini). *Zootaxa*. 3008: 33–62.
- Tang, C.-T., I. Mikó, J. A. Nicholls, S. Schwéger, M. M. Yang, G. N. Stone, F. Sinclair, M. Bozsó, G. Melika, and Z. Péntzes. 2016. New *Dryocosmus* Giraud species associated with *Cyclobaeanopsis* and non-*Quercus* host plants from the Eastern Palaearctic (Hymenoptera, Cynipidae, Cynipini). *J. Hym. Res.* 53: 77–162.
- Weld, L. H. 1952. Cynipoidea (Hym.) 1905–1950, being a Supplement to the Dalla Torre and Kieffer monograph, the Cynipidae in Das Tierreich, Lieferung 24, 1910 and bringing the systematic literature of the world up to date, including keys to families and subfamilies and list of new generic, specific and variety names. Privately Printed, Ann Arbor, Michigan. 1–351 pp.
- Weld, L. H. 1957. Cynipid galls of the Pacific Slope (Hymenoptera: Cynipoidea) an aid to their identification. 84 pp. Privately Printed, Ann Arbor, MI.



- Weld, L. H. 1959. Cynipid galls of Eastern United States. 124 pp. Privately Printed, Ann Arbor, MI.
- Weld, L. H. 1960a. Cynipid galls of the Southwest. 52 pp. Privately Printed, Ann Arbor, MI.
- Weld, L. H. 1960b. A new genus in Cynipoidea (Hymenoptera). *Proc. Entomol. Soc. Wash.* 62: 195–196.
- Yoshimoto, C. 1970. A new subfamily of Cynipoidea (Hymenoptera) from Nepal. *Can. Entomol.* 102: 1583–1585.
- Zerova, M. D., Seryogina, L., G. Melika, T. Pavlicek, and E. Nevo. 2003. New genus and new species of cynipid gall inducing wasp (Hymenoptera: Cynipidae) and new species of chalcid wasps (Hymenoptera: Chalcidoidea) from Israel. *J. Entomol. Res. Soc.* 5: 35–49.
